# Supplementary material for: β-Lactam and penicillin substituted mesoionic metal carbene complexes
Source: Royal Society of Chemistry journal article supplement (doi:10.1039/d2ob00216g), 2022-01-01

Supporting Information for

# $\beta$ -Lactam and Penicillin Substituted Mesoionic Metal Carbenes Complexes

Marta G. Avello,<sup>†</sup> María Moreno Latorre,<sup>†</sup> María C. de la Torre,<sup>\*,†,‡</sup> Luis Casarrubios,<sup>‡</sup>  
Heinz Gornitzka,<sup>§</sup> Catherine Hemmert,<sup>§</sup> Miguel A. Sierra.<sup>\*,‡</sup>

<sup>†</sup>Instituto de Química Orgánica General. Consejo Superior de Investigaciones Científicas  
(IQOG-CSIC). Juan de la Cierva 3, 28006 Madrid (Spain).

*E-mail:* [mc.delatorre@csic.es](mailto:mc.delatorre@csic.es)

<sup>‡</sup>Departamento de Química Orgánica I, Facultad de Química. Universidad Complutense, 28040  
Madrid (Spain) and Centro de Investigación en Química Avanzada (ORFEO-CINQA).

*E-mail:* [sierraor@ucm.es](mailto:sierraor@ucm.es)

<sup>§</sup>LCC-CNRS, Université de Toulouse, CNRS, UPS, Toulouse (France)

## Table of Contents

|                                                                           |     |
|---------------------------------------------------------------------------|-----|
| <b>General methods</b> .....                                              | S2  |
| General procedure for the synthesis of triazoles.....                     | S2  |
| General procedure for the synthesis of triazolium salts.....              | S4  |
| General procedure for the synthesis of Au-NHCs.....                       | S5  |
| General method for the synthesis of Pd/Pt-NHCs.....                       | S7  |
| <b>Catalytic assays</b>                                                   |     |
| General procedure for the cycloisomerisation of enines <sup>8</sup> ..... | S9  |
| General procedure for hydrosilylation of alkynes <sup>9</sup> .....       | S9  |
| <b>Crystallographic data for 15</b> .....                                 | S10 |
| <b>References</b> .....                                                   | S10 |
| <b><sup>1</sup>H and <sup>13</sup>C NMR spectra</b> .....                 | S11 |

## General methods.

Unless noted otherwise, all manipulations were carried out under argon atmosphere using standard Schlenk techniques. DMF, toluene, CH<sub>2</sub>Cl<sub>2</sub> and CH<sub>3</sub>CN were dried by passage through solvent purification columns containing activated alumina. Other solvents were HPLC grade and were used without purification. All reagents were obtained from commercial sources and used without additional purification, unless noted otherwise. Flash column chromatography was performed using silica gel 60 (Merck, n° 1.09385, 230-400 mesh). <sup>1</sup>H and <sup>13</sup>C NMR spectra were recorded at 400 or 500 MHz (<sup>1</sup>H NMR) and at 101 or 126 MHz (<sup>13</sup>C NMR) using CDCl<sub>3</sub> or Acetonitrile-*d*<sub>3</sub> as solvents with the residual solvent signal as internal reference (CHCl<sub>3</sub> 7.26 and 77.2 ppm), (Acetonitrile 1.94, and 118.26 and 1.32 ppm). The following abbreviations are used to describe peak patterns when appropriate: s (singlet), d (doublet), t (triplet), q (quadruplet), m (multiplet), and br (broad). The NMR peak assignments were based on the analysis of <sup>1</sup>H-<sup>13</sup>C -HMBC and HSQC recorded spectra along with previously reported data for related compounds. High-resolution mass spectrometry (HRMS) by the ESI technique was performed with an Agilent 6500 accurate mass apparatus with a Q-TOF analyser. IR spectra were recorded on a Perkin-Elmer 681 spectrophotometer. Melting points were determined on a Koffler block.

Compounds **9**,<sup>1</sup> **10b**,<sup>2</sup> **10c**,<sup>3</sup> **11**,<sup>4</sup> and **18**<sup>5</sup> were prepared according to previously described procedures. Benzyloxyacetyl chloride **10a** and Penicillin G potassium salt were obtained from commercial sources and used without further purification.

## General procedure for the synthesis of triazoles.

A mixture of organic azide (1.0 equiv), alkyne (1.2 equiv), sodium (L)-ascorbate (0.5 equiv) and CuSO<sub>4</sub>·5H<sub>2</sub>O (0.25 equiv) in DMF was stirred under argon at rt until completion of the reaction (TLC analysis). The reaction was quenched with water at 0 °C and allowed to reach rt. The mixture was extracted with CH<sub>2</sub>Cl<sub>2</sub> (x3). The organic layer was dried over MgSO<sub>4</sub>, filtered, and the solvent removed under *vacuum*. The crude product was purified by column chromatography (SiO<sub>2</sub>) to afford the pure triazoles *cis*-**12a**, *cis*-**12b**, *trans*-**12c** and **19**.

### Triazole *cis*-**12a**.

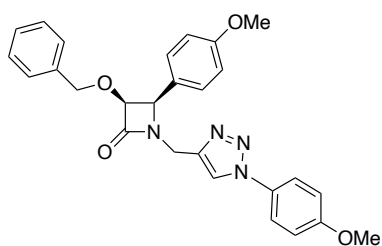

Following the general procedure, a mixture of *p*-anisyl azide **11** (75 mg, 0.50 mmol, 1.00 equiv), alkyne *cis*-**8a** (172 mg, 0.53 mmol, 1.10 equiv), sodium (L)-ascorbate (50 mg, 0.25 mmol, 0.50 equiv) and CuSO<sub>4</sub>·5H<sub>2</sub>O (31 mg, 0.13 mmol, 0.25 equiv) in DMF (5 mL) was stirred under Ar at rt for 3 h. The crude

obtained after workup was purified by SiO<sub>2</sub> chromatography (Hex/EtOAc 1:4) to yield **cis-12a** as a white solid (197 mg, 86%). <sup>1</sup>H NMR (400 MHz, CDCl<sub>3</sub>): δ 7.75 (s, 1H, N<sub>3</sub>C=CH), 7.54 (d, *J* = 9.0 Hz, 2H, *p*-OMe-C<sub>6</sub>H<sub>4</sub>), 7.28 (d, *J* = 8.7 Hz, 2H, *p*-OMe-C<sub>6</sub>H<sub>4</sub>), 7.23 – 7.17 (m, 3H, Ph), 7.02 – 6.95 (m, 4H, 2H *p*-OMe-C<sub>6</sub>H<sub>4</sub>, 2H Ph), 6.89 (d, *J* = 8.7 Hz, 2H, *p*-OMe-C<sub>6</sub>H<sub>4</sub>), 4.85 (d, *J* = 4.3 Hz, 1H, β-lactam *cis*), 4.80 (d, *J* = 15.5 Hz, 1H, N-CH<sub>2</sub>) 4.80 (d, *J* = 4.3 Hz, 1H, β-lactam *cis*), 4.29 (d, *J* = 11.3 Hz, 1H, O-CH<sub>2</sub>), 4.21 (d, *J* = 15.5 Hz, 1H, N-CH<sub>2</sub>), 4.19 (d, *J* = 11.3 Hz, 1H, O-CH<sub>2</sub>), 3.85 (s, 3H, CH<sub>3</sub>, *p*-OMe-C<sub>6</sub>H<sub>4</sub>), 3.80 (s, 3H, CH<sub>3</sub>, *p*-OMe-C<sub>6</sub>H<sub>4</sub>). <sup>13</sup>C NMR (101 MHz, CDCl<sub>3</sub>): δ 167.0 (C, C=O), 160.1 (C, *p*-OMe-C<sub>6</sub>H<sub>4</sub>), 160.0 (C, *p*-OMe-C<sub>6</sub>H<sub>4</sub>), 142.6 (C, N<sub>3</sub>C=CH), 136.5 (C, Ph), 130.4 (C, *p*-OMe-C<sub>6</sub>H<sub>4</sub>), 130.1 (2CH, *p*-OMe-C<sub>6</sub>H<sub>4</sub>), 128.3 (2CH, Ph), 128.3 (2CH, Ph), 128.0 (CH, Ph), 125.5 (C, *p*-OMe-C<sub>6</sub>H<sub>4</sub>), 122.2 (2CH, *p*-OMe-C<sub>6</sub>H<sub>4</sub>), 121.0 (CH, N<sub>3</sub>C=CH), 114.9 (2CH, *p*-OMe-C<sub>6</sub>H<sub>4</sub>), 114.0 (2CH, *p*-OMe-C<sub>6</sub>H<sub>4</sub>), 83.8 (CH, β-lactam), 72.3 (CH<sub>2</sub>, O-CH<sub>2</sub>), 61.9 (CH, β-lactam), 55.7 (CH<sub>3</sub>, *p*-OMe-C<sub>6</sub>H<sub>4</sub>), 55.4 (CH<sub>3</sub>, *p*-OMe-C<sub>6</sub>H<sub>4</sub>), 35.4 (CH<sub>2</sub>, N-CH<sub>2</sub>). IR (KBr): ν<sub>max</sub> 1759, 1611, 1518, 1455, 1304, 1253, 1176, 1045, 1033, 835, 738, 699. cm<sup>-1</sup>. MS (ESI) *m/z* calculated for C<sub>27</sub>H<sub>27</sub>N<sub>4</sub>O<sub>4</sub>: 471.2027 [M+H]<sup>+</sup>; found 471.2018. Mp: 137–139 °C.

#### Triazole **trans-12c**.

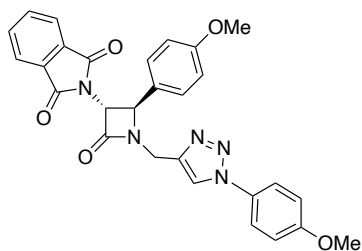

Following the general procedure, a mixture of *p*-anisyl azide **11** (120 mg, 0.8 mmol, 1.0 equiv), alkyne **8c** (317 mg, 0.9 mmol, 1.1 equiv), sodium (L)-ascorbate (78 mg, 0.4 mmol, 0.5 equiv) and CuSO<sub>4</sub>·5H<sub>2</sub>O (49 mg, 0.2 mmol, 0.3 equiv) in DMF (6 mL) was stirred under Ar at rt for 5 h. The crude obtained after workup was purified by SiO<sub>2</sub> chromatography (Hex/EtOAc 3:7) to yield **trans-12c** as a white solid (358 mg, 89%). <sup>1</sup>H NMR (400 MHz, CDCl<sub>3</sub>): δ 8.43 (s, 1H, N<sub>3</sub>C=CH), 7.89 – 7.81 (m, 2H, Phth), 7.77 – 7.71 (m, 4H, 2H Phth+ 2H *p*-OMe-C<sub>6</sub>H<sub>4</sub>), 7.23 (d, *J* = 8.3 Hz, 2H, *p*-OMe-C<sub>6</sub>H<sub>4</sub>), 7.05 (d, *J* = 8.7 Hz, 2H, *p*-OMe-C<sub>6</sub>H<sub>4</sub>), 6.91 (d, *J* = 8.2 Hz, 2H, *p*-OMe-C<sub>6</sub>H<sub>4</sub>), 5.27 (d, *J* = 2.5 Hz, 1H, β-lactam *trans*), 5.04 (d, *J* = 16.1 Hz, 1H, N-CH<sub>2</sub>), 4.89 (d, *J* = 2.3 Hz, 1H, β-lactam *trans*), 4.25 (d, *J* = 16.1 Hz, 1H, N-CH<sub>2</sub>), 3.88 (s, 3H, CH<sub>3</sub>, *p*-OMe-C<sub>6</sub>H<sub>4</sub>), 3.80 (s, 3H, CH<sub>3</sub>, *p*-OMe-C<sub>6</sub>H<sub>4</sub>). <sup>13</sup>C NMR (101 MHz, CDCl<sub>3</sub>): δ 167.0 (2C, C=O, Phth), 165.0 (C, C=O, β-lactam), 160.5 (C, *p*-OMe-C<sub>6</sub>H<sub>4</sub>), 159.9 (C, *p*-OMe-C<sub>6</sub>H<sub>4</sub>), 142.8 (C, N<sub>3</sub>C=CH), 134.6 (2CH, Phth), 131.8 (2C, Phth), 130.8 (C, *p*-OMe-C<sub>6</sub>H<sub>4</sub>), 128.2 (2CH, *p*-OMe-C<sub>6</sub>H<sub>4</sub>), 126.8 (C, *p*-OMe-C<sub>6</sub>H<sub>4</sub>), 123.9 (2CH, Phth), 122.2 (2CH, *p*-OMe-C<sub>6</sub>H<sub>4</sub>), 121.5 (CH, N<sub>3</sub>C=CH), 114.9 (2CH, *p*-OMe-C<sub>6</sub>H<sub>4</sub>), 114.8 (2CH, *p*-OMe-C<sub>6</sub>H<sub>4</sub>), 62.6 (CH, β-lactam), 60.2 (CH, β-lactam), 55.8 (CH<sub>3</sub>, *p*-OMe-C<sub>6</sub>H<sub>4</sub>), 55.5 (CH<sub>3</sub>, *p*-OMe-C<sub>6</sub>H<sub>4</sub>), 36.6 (CH<sub>2</sub>, N-CH<sub>2</sub>). IR (KBr): ν<sub>max</sub> 1767, 1720, 1612, 1518, 1392, 1253, 1179, 1104, 1033, 834, 717, 530 cm<sup>-1</sup>. MS (ESI) *m/z* calculated for C<sub>28</sub>H<sub>24</sub>N<sub>5</sub>O<sub>5</sub>: 510.1772 [M+H]<sup>+</sup>; found 510.1761. Mp: 168–170 °C.

## General procedure for the synthesis of triazolium salts.

**Method A.** A mixture of triazole (1.0 equiv) and Meerwein's salt (1.3 equiv) in CH<sub>2</sub>Cl<sub>2</sub> was stirred under argon at rt until reaction completion (TLC analysis). The reaction was quenched with some drops of methanol. The solvent was removed under *vacuum* and the resulting residue was dissolved in the minimum amount of CH<sub>2</sub>Cl<sub>2</sub> and precipitated with Et<sub>2</sub>O. The solvents were decanted, and the solid was washed with Et<sub>2</sub>O (x3) and *vacuum*-dried to yield pure triazolium salts **cis-13b** and **trans-13c**.

**Method B.** MeOTf (0.9 equiv) was added to a CH<sub>2</sub>Cl<sub>2</sub> solution of triazole (1.0 equiv) at 0 °C. The mixture was stirred at 0 °C for 4h, until no evolution of the reaction was observed. The solvent was removed under *vacuum* and the resulting residue was dissolved in the minimum amount of CH<sub>2</sub>Cl<sub>2</sub> and precipitated with Et<sub>2</sub>O. The solvents were decanted and the solid was washed with Et<sub>2</sub>O (x3) and *vacuum*-dried to yield the pure triazolium salts **cis-13a** and **20**.

### Triazolium salt **trans-13c**.

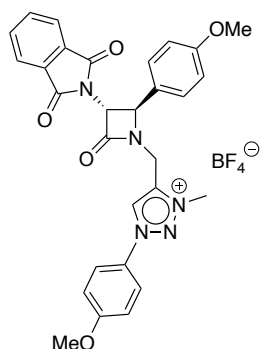

Following *Method A*, treatment of **12c** (120 mg, 0.2 mmol, 1.0 equiv) with Me<sub>3</sub>OBF<sub>4</sub> (45 mg, 0.3 mmol, 1.3 equiv) in CH<sub>2</sub>Cl<sub>2</sub> (8 mL) afforded pure **trans-13c** as a light pink solid (127 mg, 88%). <sup>1</sup>H NMR (400 MHz, Acetonitrile-*d*<sub>3</sub>): δ 8.82 (s, 1H, N<sub>3</sub>C=CH), 7.90 – 7.81 (m, 4H, Phth), 7.78 (d, *J* = 9.1 Hz, 2H, *p*-OMe-C<sub>6</sub>H<sub>4</sub>), 7.39 (d, *J* = 8.6 Hz, 2H, *p*-OMe-C<sub>6</sub>H<sub>4</sub>), 7.23 (d, *J* = 9.0 Hz, 2H, *p*-OMe-C<sub>6</sub>H<sub>4</sub>), 6.97 (d, *J* = 8.6 Hz, 2H, *p*-OMe-C<sub>6</sub>H<sub>4</sub>), 5.27 (d, *J* = 2.0 Hz, 1H, β-lactam *trans*), 5.10 – 4.99 (m, 2H, 1H β-lactam *trans* + 1H N-CH<sub>2</sub>), 4.44 (d, *J* = 17.1 Hz, 1H, N-CH<sub>2</sub>), 4.32 (s, 3H, CH<sub>3</sub>, N-CH<sub>3</sub>), 3.92 (s, 3H, CH<sub>3</sub>, *p*-OMe-C<sub>6</sub>H<sub>4</sub>), 3.77 (s, 3H, CH<sub>3</sub>, *p*-OMe-C<sub>6</sub>H<sub>4</sub>). <sup>13</sup>C NMR (101 MHz, Acetonitrile-*d*<sub>3</sub>): δ 168.3 (2C, C=O, Phth), 165.8 (C, C=O, β-lactam), 163.3 (C, *p*-OMe-C<sub>6</sub>H<sub>4</sub>), 161.5 (C, *p*-OMe-C<sub>6</sub>H<sub>4</sub>), 140.7 (C, N<sub>3</sub>C=CH), 135.9 (2CH, Phth), 132.7 (2C, Phth), 129.7 (2CH, *p*-OMe-C<sub>6</sub>H<sub>4</sub>), 128.9 (C, *p*-OMe-C<sub>6</sub>H<sub>4</sub>), 128.5 (CH, N<sub>3</sub>C=CH), 127.6 (C, *p*-OMe-C<sub>6</sub>H<sub>4</sub>), 124.5 (2CH, Phth), 124.1 (2CH, *p*-OMe-C<sub>6</sub>H<sub>4</sub>), 116.5 (2CH, *p*-OMe-C<sub>6</sub>H<sub>4</sub>), 115.5 (2CH, *p*-OMe-C<sub>6</sub>H<sub>4</sub>), 63.8 (CH, β-lactam), 61.4 (CH, β-lactam), 56.8 (CH<sub>3</sub>, *p*-OMe-C<sub>6</sub>H<sub>4</sub>), 56.1 (CH<sub>3</sub>, *p*-OMe-C<sub>6</sub>H<sub>4</sub>), 39.4 (CH<sub>3</sub>, N-CH<sub>3</sub>), 34.3 (CH<sub>2</sub>, N-CH<sub>2</sub>).

IR (KBr): ν<sub>max</sub> 1770, 1718, 1516, 1392, 1258, 1179, 1057, 1027, 837, 719 cm<sup>-1</sup>. MS (ESI) *m/z* calculated for C<sub>29</sub>H<sub>26</sub>N<sub>5</sub>O<sub>5</sub>: 524.1929 [M]<sup>+</sup>; found 524.1929. Mp: 245–247 °C.

### Triazolium salt **cis-13a**.

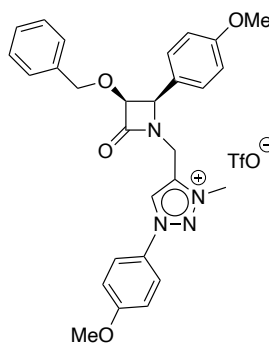

Following *Method B*, treatment of **12a** (277 mg, 0.6 mmol, 1.0 equiv) with MeOTf (80  $\mu$ L, 0.7 mmol, 1.2 equiv) in  $\text{CH}_2\text{Cl}_2$  (20 mL) afforded pure **cis-13a** as a white solid (367 mg, 98%).  $^1\text{H}$  NMR (400 MHz,  $\text{CDCl}_3$ ):  $\delta$  8.74 (s, 1H,  $\text{N}_3\text{C}=\text{CH}$ ), 7.62 (d,  $J = 9.1$  Hz, 2H,  $p\text{-OMe-C}_6\text{H}_4$ ), 7.26 (m, 5H, 3H Ph + 2H  $p\text{-OMe-C}_6\text{H}_4$ ), 7.03 (d,  $J = 9.1$  Hz, 2H,  $p\text{-OMe-C}_6\text{H}_4$ ), 7.01 – 6.96 (m, 2H, Ph), 6.76 (d,  $J = 8.3$  Hz, 2H,  $p\text{-OMe-C}_6\text{H}_4$ ), 5.04 (d,  $J = 4.1$  Hz, 1H,  $\beta\text{-lactam cis}$ ), 5.01 (d,  $J = 4.1$  Hz, 1H,  $\beta\text{-lactam cis}$ ), 4.78 (d,  $J = 16.4$  Hz, 1H, N- $\text{CH}_2$ ), 4.70 (d,  $J = 16.4$  Hz, 1H, N- $\text{CH}_2$ ), 4.35 – 4.26 (m, 4H, 3H N- $\text{CH}_3$  + 1H O- $\text{CH}_2$ ), 4.15 (d,  $J = 11.1$  Hz, 1H, O- $\text{CH}_2$ ), 3.88 (s, 3H,  $p\text{-OMe-C}_6\text{H}_4$ ), 3.64 (s, 3H,  $p\text{-OMe-C}_6\text{H}_4$ ).  $^{13}\text{C}$  NMR (101 MHz,  $\text{CDCl}_3$ ):  $\delta$  167.3 (C, C=O), 162.1 (C,  $p\text{-OMe-C}_6\text{H}_4$ ), 160.0 (C,  $p\text{-OMe-C}_6\text{H}_4$ ), 139.5 (C,  $\text{N}_3\text{C}=\text{CH}$ ), 136.1 (C, Ph), 130.3 (2CH,  $p\text{-OMe-C}_6\text{H}_4$ ), 128.3 (2CH, Ph), 128.2 (2CH, Ph), 128.2 (CH, Ph), 128.0 (CH,  $\text{N}_3\text{C}=\text{CH}$ ), 127.4 (C,  $p\text{-OMe-C}_6\text{H}_4$ ), 125.2 (C,  $p\text{-OMe-C}_6\text{H}_4$ ), 122.8 (2CH,  $p\text{-OMe-C}_6\text{H}_4$ ), 115.3 (2CH,  $p\text{-OMe-C}_6\text{H}_4$ ), 113.8 (2CH,  $p\text{-OMe-C}_6\text{H}_4$ ), 84.0 (CH,  $\beta\text{-lactam}$ ), 72.6 ( $\text{CH}_2$ , O- $\text{CH}_2$ ), 62.4 (CH,  $\beta\text{-lactam}$ ), 55.9 ( $\text{CH}_3$ ,  $p\text{-OMe-C}_6\text{H}_4$ ), 55.1 ( $\text{CH}_3$ ,  $p\text{-OMe-C}_6\text{H}_4$ ), 38.2 ( $\text{CH}_3$ , N- $\text{CH}_3$ ), 32.8 ( $\text{CH}_2$ , N- $\text{CH}_2$ ). IR (KBr):  $\nu_{\text{max}}$  3065, 2939, 1763, 1611, 1516, 1264, 1177, 1159, 1031, 837, 737, 701, 639, 518  $\text{cm}^{-1}$ . MS (ESI)  $m/z$  calculated for  $\text{C}_{28}\text{H}_{29}\text{N}_4\text{O}_4$ : 485.2183 [M] $^+$ ; found 485.2178. Mp: 72–75  $^\circ\text{C}$ .

### General procedure for the synthesis of Au-NHCs.

In a Schlenk flask charged with 4  $\text{\AA}$  molecular sieves, a mixture of triazolium salt (1.0 equiv),  $\text{NMe}_4\text{Cl}$  (1.5 equiv) and  $\text{Ag}_2\text{O}$  (0.8 equiv) was stirred at rt in the dark in a 1:10  $\text{CH}_3\text{CN}/\text{CH}_2\text{Cl}_2$  mixture until formation of the corresponding silver carbene ( $^1\text{H}$  NMR analysis).  $[\text{AuCl}(\text{SMe}_2)]$  complex (1.0 equiv) was then added and the mixture was stirred at rt until the reaction was completed ( $^1\text{H}$  NMR analysis). The mixture was filtered through a pad of Celite and the volatiles were removed under *vacuum* to afford the corresponding carbene complexes **cis-14a**, **cis-14b** and **trans-14c**, which were purified through a short pad of  $\text{SiO}_2$ .

**Au(I) complex *cis-14a*.**

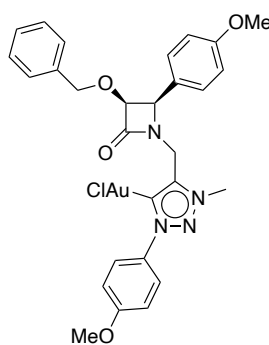

Following the general procedure, a mixture of ***cis-13a*** (100 mg, 0.2 mmol, 1.0 equiv), NMe<sub>4</sub>Cl (26 mg, 0.2 mmol, 1.5 equiv) and Ag<sub>2</sub>O (28 mg, 0.1 mmol, 0.8 equiv) in 10:1 CH<sub>2</sub>Cl<sub>2</sub>: CH<sub>3</sub>CN (11 mL) was stirred under argon at rt overnight. [AuCl(SMe<sub>2</sub>)] (46 mg, 0.2 mmol, 1.0 equiv) was then added and the mixture was stirred for another 2h. The residue was purified (SiO<sub>2</sub>, CH<sub>2</sub>Cl<sub>2</sub>/MeOH 98:2) to yield ***cis-14a*** as a white solid (67 mg, 59%). Suitable crystals for X-ray analysis were obtained from a CHCl<sub>3</sub>/EtOAc/Hexane mixture of solvents. <sup>1</sup>H NMR (400 MHz, CDCl<sub>3</sub>): δ 7.71 (d, *J* = 9.0 Hz, 2H, *p*-OMe-C<sub>6</sub>H<sub>4</sub>), 7.29 (d, *J* = 8.7 Hz, 2H, *p*-OMe-C<sub>6</sub>H<sub>4</sub>), 7.24 – 7.20 (m, 3H, Ph), 7.00 (dd, *J* = 6.6, 2.9 Hz, 2H, Ph), 6.95 (d, *J* = 9.1 Hz, 2H, *p*-OMe-C<sub>6</sub>H<sub>4</sub>), 6.82 (d, *J* = 8.7 Hz, 2H, *p*-OMe-C<sub>6</sub>H<sub>4</sub>), 5.00 (d, *J* = 4.4 Hz, 1H, β-lactam *cis*), 4.90 (d, *J* = 4.3 Hz, 1H, β-lactam *cis*), 4.49 (d, *J* = 15.9 Hz, 1H, N-CH<sub>2</sub>), 4.43 (d, *J* = 15.9 Hz, 1H, N-CH<sub>2</sub>), 4.29 – 4.24 (m, 4H, 3H N-CH<sub>3</sub> + 1H O-CH<sub>2</sub>), 4.17 (d, *J* = 11.3 Hz, 1H, O-CH<sub>2</sub>), 3.84 (s, 3H, *p*-OMe-C<sub>6</sub>H<sub>4</sub>), 3.75 (s, 3H, *p*-OMe-C<sub>6</sub>H<sub>4</sub>). <sup>13</sup>C NMR (101 MHz, CDCl<sub>3</sub>): δ 167.2 (C, C=O), 161.1 (C, *p*-OMe-C<sub>6</sub>H<sub>4</sub>), 160.2 (C, *p*-OMe-C<sub>6</sub>H<sub>4</sub>), 159.0 (C, N<sub>3</sub>C=CAu), 141.6 (C, N<sub>3</sub>C=CAu), 136.1 (C, Ph), 131.7 (C, *p*-OMe-C<sub>6</sub>H<sub>4</sub>), 130.8 (2CH, *p*-OMe-C<sub>6</sub>H<sub>4</sub>), 128.5 (2CH, Ph), 128.4 (2CH, Ph), 128.2 (CH, Ph), 125.3 (2CH, *p*-OMe-C<sub>6</sub>H<sub>4</sub>), 124.8 (C, *p*-OMe-C<sub>6</sub>H<sub>4</sub>), 114.6 (2CH, *p*-OMe-C<sub>6</sub>H<sub>4</sub>), 114.1 (2CH, *p*-OMe-C<sub>6</sub>H<sub>4</sub>), 83.9 (CH, β-lactam), 72.7 (CH<sub>2</sub>, O-CH<sub>2</sub>), 62.5 (CH, β-lactam), 55.8 (CH<sub>3</sub>, *p*-OMe-C<sub>6</sub>H<sub>4</sub>), 55.4 (CH<sub>3</sub>, *p*-OMe-C<sub>6</sub>H<sub>4</sub>), 37.5 (CH<sub>3</sub>, N-CH<sub>3</sub>), 34.6 (CH<sub>2</sub>, N-CH<sub>2</sub>). IR (KBr): ν<sub>max</sub> 1757, 1610, 1513, 1252, 1175, 1029, 836 cm<sup>-1</sup>. MS (ESI) *m/z* calculated for C<sub>28</sub>H<sub>28</sub>AuN<sub>4</sub>O<sub>4</sub>: 681.1776 [M-Cl]<sup>+</sup>; found 681.1853. Mp: 119–122 °C.

**Au(I) complex *trans-14c*.**

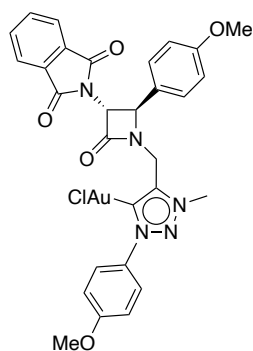

Following the general procedure, a mixture of ***13c*** (100 mg, 0.2 mmol, 1.0 equiv), NMe<sub>4</sub>Cl (27 mg, 0.2 mmol, 1.5 equiv) and Ag<sub>2</sub>O (29 mg, 0.1 mmol, 0.8 equiv) in 10:1 CH<sub>2</sub>Cl<sub>2</sub>:CH<sub>3</sub>CN (16.5 mL) was stirred under argon at rt overnight. [AuCl(SMe<sub>2</sub>)] (48 mg, 0.2 mmol, 1.0 equiv) was then added and the mixture was stirred for another 3 h. The residue was purified (SiO<sub>2</sub>, CH<sub>2</sub>Cl<sub>2</sub>/MeOH 98:2) to yield ***trans-14c*** as a brownish white solid (69 mg, 57%).

<sup>1</sup>H NMR (500 MHz, CDCl<sub>3</sub>): δ 7.93 (d, *J* = 9.0 Hz, 2H, *p*-OMe-C<sub>6</sub>H<sub>4</sub>), 7.83 – 7.80 (m, 2H, Phth), 7.76 – 7.72 (m, 2H, Phth), 7.41 (d, *J* = 8.7 Hz, 2H, *p*-OMe-C<sub>6</sub>H<sub>4</sub>), 7.00 (dd, *J* = 8.9, 2.1 Hz, 4H, *p*-OMe-C<sub>6</sub>H<sub>4</sub>), 5.35 (d, *J* = 2.4 Hz, 1H, β-lactam *trans*), 4.90 (d, *J* = 2.4 Hz, 1H, β-lactam *trans*), 4.79 (d, *J* = 15.7 Hz, 1H, N-CH<sub>2</sub>), 4.48 (s, 3H, CH<sub>3</sub>, N-CH<sub>3</sub>), 4.35 (d, *J* = 15.8 Hz, 1H, N-CH<sub>2</sub>), 3.87 (s, 3H, CH<sub>3</sub>, *p*-OMe-C<sub>6</sub>H<sub>4</sub>), 3.84 (s, 3H, CH<sub>3</sub>, *p*-OMe-C<sub>6</sub>H<sub>4</sub>). <sup>13</sup>C NMR (126 MHz, CDCl<sub>3</sub>): δ 166.9 (2C, C=O, Phth),

165.4 (C, C=O,  $\beta$ -lactam), 161.1 (C, *p*-OMe-C<sub>6</sub>H<sub>4</sub>), 160.9 (C, *p*-OMe-C<sub>6</sub>H<sub>4</sub>), 158.8 (C, N<sub>3</sub>C=CAu), 140.8 (C, N<sub>3</sub>C=CAu), 134.7 (2CH, Phth), 132.0 (C, *p*-OMe-C<sub>6</sub>H<sub>4</sub>), 131.7 (2C, Phth), 129.1 (2CH, *p*-OMe-C<sub>6</sub>H<sub>4</sub>), 125.4 (2CH, *p*-OMe-C<sub>6</sub>H<sub>4</sub>), 125.2 (C, *p*-OMe-C<sub>6</sub>H<sub>4</sub>), 123.9 (2CH, Phth), 115.4 (2CH, *p*-OMe-C<sub>6</sub>H<sub>4</sub>), 114.7 (2CH, *p*-OMe-C<sub>6</sub>H<sub>4</sub>), 62.1 (CH,  $\beta$ -lactam), 60.3 (CH,  $\beta$ -lactam), 55.9 (CH<sub>3</sub>, *p*-OMe-C<sub>6</sub>H<sub>4</sub>), 55.6 (CH<sub>3</sub>, *p*-OMe-C<sub>6</sub>H<sub>4</sub>), 38.1 (CH<sub>3</sub>, N-CH<sub>3</sub>), 34.7 (CH<sub>2</sub>, N-CH<sub>2</sub>). **IR (KBr):**  $\nu_{\max}$  1767, 1720, 1514, 1390, 1253, 1176, 1103, 1030, 836, 717 cm<sup>-1</sup>. **MS (ESI) *m/z*** calculated for C<sub>29</sub>H<sub>25</sub>AuN<sub>5</sub>O<sub>5</sub>: 720.1516 [M-Cl]<sup>+</sup>; found 720.1510. **Mp:** (dec.).

### General method for the synthesis of Pd/Pt-NHCs.

To a mixture of triazolium salt (1.0 equiv), potassium carbonate (1.1 equiv), [K<sub>2</sub>(PtCl<sub>4</sub>)] or PdCl<sub>2</sub> (1.1 equiv) and potassium iodide (5.0 equiv), 5 mL of pyridine were added. The mixture was stirred under argon at 84 °C for 17-48 h. Pyridine was evaporated under vacuum and the residue was diluted with water and extracted with CH<sub>2</sub>Cl<sub>2</sub>. The organic layer was washed with water and brine, dried over anhydrous Na<sub>2</sub>SO<sub>4</sub> and filtered. The solvent was removed under *vacuum* and the crude product was purified by column chromatography (SiO<sub>2</sub>) to afford the pure carbenes **cis-15**, **16a**, **16b** and **22**.

#### Complex **trans-16a**.

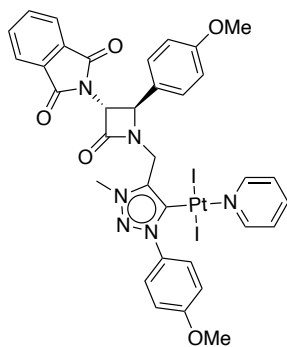

Following the general method, a mixture of triazolium salt **trans-13c** (150 mg, 0.2 mmol, 1.0 equiv), K<sub>2</sub>CO<sub>3</sub> (38 mg, 0.3 mmol, 1.1 equiv), [K<sub>2</sub>(PtCl<sub>4</sub>)] (112 mg, 0.3 mmol, 1.1 equiv) and KI (66 mg, 0.4 mmol, 5.0 equiv) was stirred in pyridine (5 mL) at 84°C for 48 h, yielding, after purification (SiO<sub>2</sub>, Hex/EtOAc 2:3), pure **trans-16a** (44 mg, 17%) as an orange solid. (47 mg of triazole **trans-12c** were also recovered during purification as previously described).<sup>6</sup> <sup>1</sup>H NMR (500 MHz, CDCl<sub>3</sub>):  $\delta$

8.26 (d, *J* = 9.0 Hz, 2H, *p*-OMe-C<sub>6</sub>H<sub>4</sub>), 8.17 (d, *J* = 5.0 Hz, 2H, Py), 7.87 – 7.82 (m, 2H, Phth), 7.76 – 7.73 (m, 2H, Phth), 7.58 (t, *J* = 7.7 Hz, 1H, Py), 7.53 (d, *J* = 8.7 Hz, 2H, *p*-OMe-C<sub>6</sub>H<sub>4</sub>), 7.13 – 7.08 (m, 2H, Py), 7.06 (d, *J* = 9.0 Hz, 2H, *p*-OMe-C<sub>6</sub>H<sub>4</sub>), 6.97 (d, *J* = 8.7 Hz, 2H, *p*-OMe-C<sub>6</sub>H<sub>4</sub>), 5.38 (d, *J* = 2.1 Hz, 1H,  $\beta$ -lactam *trans*), 5.22 (d, *J* = 15.9 Hz, 1H, N-CH<sub>2</sub>), 5.13 (d, *J* = 2.2 Hz, 1H,  $\beta$ -lactam *trans*), 5.02 (d, *J* = 15.9 Hz, 1H, N-CH<sub>2</sub>), 4.45 (s, 3H, CH<sub>3</sub>, N-CH<sub>3</sub>), 3.89 (s, 3H, CH<sub>3</sub>, *p*-OMe-C<sub>6</sub>H<sub>4</sub>), 3.87 (s, 3H, CH<sub>3</sub>, *p*-OMe-C<sub>6</sub>H<sub>4</sub>). <sup>13</sup>C NMR (126 MHz, CDCl<sub>3</sub>):  $\delta$  166.8 (2C, C=O, Phth), 165.5 (C, C=O,  $\beta$ -lactam), 160.4 (C, *p*-OMe-C<sub>6</sub>H<sub>4</sub>), 159.9 (C, *p*-OMe-C<sub>6</sub>H<sub>4</sub>), 153.6 (2CH, Py), 139.6 (C, N<sub>3</sub>C=Cpt), 137.1 (CH, Py), 134.6 (2CH, Phth), 133.0 (C, *p*-OMe-C<sub>6</sub>H<sub>4</sub>), 131.8 (2C, Phth), 129.0 (2CH, *p*-OMe-C<sub>6</sub>H<sub>4</sub>), 127.7 (C, *p*-OMe-C<sub>6</sub>H<sub>4</sub>), 127.3 (C, N<sub>3</sub>C=Cpt), 126.8 (2CH, *p*-OMe-C<sub>6</sub>H<sub>4</sub>), 124.6 (2CH, Py),

123.9 (2CH, Phth), 114.7 (2CH, *p*-OMe-C<sub>6</sub>H<sub>4</sub>), 113.7 (2CH, *p*-OMe-C<sub>6</sub>H<sub>4</sub>), 63.7 (CH, β-lactam), 60.9 (CH, β-lactam), 55.7 (CH<sub>3</sub>, *p*-OMe-C<sub>6</sub>H<sub>4</sub>), 55.5 (CH<sub>3</sub>, *p*-OMe-C<sub>6</sub>H<sub>4</sub>), 38.1 (CH<sub>3</sub>, N-CH<sub>3</sub>), 35.1 (CH<sub>2</sub>, N-CH<sub>2</sub>). IR (KBr):  $\nu_{\max}$  1767, 1721, 1607, 1514, 1390, 1251, 1175, 834, 716 cm<sup>-1</sup>. MS (ESI) *m/z* calculated for C<sub>34</sub>H<sub>31</sub>I<sub>2</sub>N<sub>6</sub>O<sub>5</sub>Pt: 1052.0090 [M+H]<sup>+</sup>; found 1052.010. Mp: 187–189 °C.

#### Complex **trans-16b**.

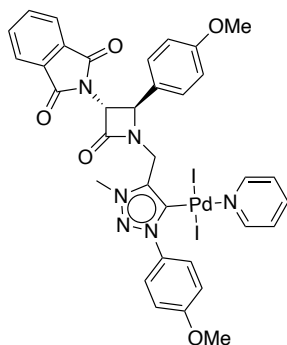

Following the general method, a mixture of triazolium salt **trans-13c** (100 mg, 0.2 mmol, 1.0 equiv), K<sub>2</sub>CO<sub>3</sub> (45 mg, 0.3 mmol, 2.0 equiv), PdCl<sub>2</sub> (32 mg, 0.2 mmol, 1.1 equiv) and KI (135 mg, 0.8 mmol, 5.0 equiv) was stirred in pyridine (4 mL) at 84 °C for 24 h, yielding, after purification (SiO<sub>2</sub>, Hex/EtOAc 1:1), pure **trans-16b** (79 mg, 50 %) as an orange solid. (Again, a small amount of triazole **trans-12c** was observed in the <sup>1</sup>H NMR of the crude).<sup>6</sup> Suitable crystals for X-ray

analysis were obtained from an EtOAc/Hexane mixture. <sup>1</sup>H NMR (400 MHz, CDCl<sub>3</sub>): δ 8.18 (d, *J* = 9.0 Hz, 2H, *p*-OMe-C<sub>6</sub>H<sub>4</sub>), 8.10 (d, *J* = 4.8 Hz, 2H, Py), 7.80 – 7.74 (m, 2H, Phth), 7.69 – 7.64 (m, 2H, Phth), 7.56 – 7.50 (m, 1H, Py), 7.48 (d, *J* = 8.7 Hz, 2H, *p*-OMe-C<sub>6</sub>H<sub>4</sub>), 7.06 – 7.03 (m, 2H, Py), 7.01 (d, *J* = 8.9 Hz, 2H, *p*-OMe-C<sub>6</sub>H<sub>4</sub>), 6.89 (d, *J* = 8.7 Hz, 2H, *p*-OMe-C<sub>6</sub>H<sub>4</sub>), 5.33 (d, *J* = 2.1 Hz, 1H, β-lactam *trans*), 5.07 (d, *J* = 16.1 Hz, 1H, N-CH<sub>2</sub>), 5.07 (d, *J* = 2.2 Hz, 1H, β-lactam *trans*), 4.98 (d, *J* = 16.1 Hz, 1H, N-CH<sub>2</sub>), 4.36 (s, 3H, CH<sub>3</sub>, N-CH<sub>3</sub>), 3.82 (s, 3H, CH<sub>3</sub>, *p*-OMe-C<sub>6</sub>H<sub>4</sub>), 3.78 (s, 3H, CH<sub>3</sub>, *p*-OMe-C<sub>6</sub>H<sub>4</sub>). <sup>13</sup>C NMR (101 MHz, CDCl<sub>3</sub>): δ 166.7 (2C, C=O, Phth), 165.4 (C, C=O, β-lactam), 160.6 (C, *p*-OMe-C<sub>6</sub>H<sub>4</sub>), 160.0 (C, *p*-OMe-C<sub>6</sub>H<sub>4</sub>), 153.3 (2CH, Py), 138.8 (C, N<sub>3</sub>C=CPd), 137.3 (C, N<sub>3</sub>C=CPd), 137.2 (CH, Py), 134.5 (2CH, Phth), 133.0 (C, *p*-OMe-C<sub>6</sub>H<sub>4</sub>), 131.7 (2C, Phth), 129.1 (2CH, *p*-OMe-C<sub>6</sub>H<sub>4</sub>), 127.2 (C, *p*-OMe-C<sub>6</sub>H<sub>4</sub>), 126.5 (2CH, *p*-OMe-C<sub>6</sub>H<sub>4</sub>), 124.0 (2CH, Py), 123.8 (2CH, Phth), 114.6 (2CH, *p*-OMe-C<sub>6</sub>H<sub>4</sub>), 113.9 (2CH, *p*-OMe-C<sub>6</sub>H<sub>4</sub>), 63.6 (CH, β-lactam), 61.1 (CH, β-lactam), 55.6 (CH<sub>3</sub>, *p*-OMe-C<sub>6</sub>H<sub>4</sub>), 55.4 (CH<sub>3</sub>, *p*-OMe-C<sub>6</sub>H<sub>4</sub>), 38.1 (CH<sub>3</sub>, N-CH<sub>3</sub>), 35.6 (CH<sub>2</sub>, N-CH<sub>2</sub>). IR (KBr):  $\nu_{\max}$  1767, 1721, 1514, 1390, 1251, 1175, 834, 716 cm<sup>-1</sup>. MS (ESI) *m/z* calculated for C<sub>34</sub>H<sub>31</sub>N<sub>6</sub>O<sub>5</sub>I<sub>2</sub>Pd: 962.9487 [M+H]<sup>+</sup>; found 962.9428. Mp: (dec.).

#### Complex **22**.

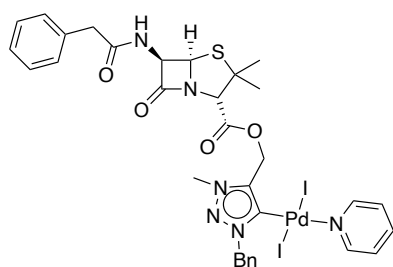

Following the general method, a mixture of triazolium salt **20** (150 mg, 0.2 mmol, 1.0 equiv), K<sub>2</sub>CO<sub>3</sub> (62 mg, 0.5 mmol, 2.0 equiv), PdCl<sub>2</sub> (44 mg, 0.3 mmol, 1.1 equiv) and KI (185 mg, 1.1 mmol, 5.0 equiv) was stirred in pyridine (2 mL) at 80 °C for 17 h, yielding, after purification (SiO<sub>2</sub>, Hex/AcOEt 1:1),



pure **23** (54 mg, 25 %) as an orange solid.  $^1\text{H}$  NMR (500 MHz,  $\text{CDCl}_3$ ):  $\delta$  8.96 (dt,  $J = 5.0, 1.6$  Hz, 2H, Py), 7.72 (tt,  $J = 7.7, 1.7$  Hz, 1H, Py), 7.65 (dd,  $J = 7.5, 2.0$  Hz, 2H, Py), 7.45 – 7.21 (m, 10H, 2Ph), 6.04 (d,  $J = 9.1$  Hz, 1H, NH), 5.95 (s, 2H, N- $\text{CH}_2$ ), 5.67 – 5.60 (m, 2H, 1H  $\beta$ -lactam + 1H O- $\text{CH}_2$ ), 5.57 (d,  $J = 4.2$  Hz, 1H,  $\beta$ -lactam), 5.50 (d,  $J = 13.5$  Hz, 1H, O- $\text{CH}_2$ ), 4.49 (s, 1H,  $\beta$ -lactam), 4.05 (s, 3H, N- $\text{CH}_3$ ), 3.63 (s, 2H, Ph- $\text{CH}_2$ ), 1.56 (s, 3H,  $\text{CH}_3$ ), 1.47 (s, 3H,  $\text{CH}_3$ ).  $^{13}\text{C}$  NMR (126 MHz,  $\text{CDCl}_3$ ):  $\delta$  173.5 (C, C=O,  $\beta$ -lactam), 170.4 (C, C=O, HN-C=O), 167.6 (C, C=O, O-C=O), 154.0 (2CH, Py), 139.9 (C,  $\text{N}_3\text{C}=\text{CPd}$ ), 137.9 (C,  $\text{N}_3\text{C}=\text{CPd}$ ), 137.7 (CH, Py), 133.9 (C, Ph), 133.2 (C, Ph), 130.3 (2CH, Py), 129.7 (2CH, Ph), 129.3 (2CH, Ph), 129.2 (CH, Ph), 129.0 (2CH, Ph), 127.8 (CH, Ph), 124.6 (2CH, Ph), 70.4 (CH,  $\beta$ -lactam), 68.2 (CH,  $\beta$ -lactam), 65.0 (C,  $\text{C}(\text{CH}_3)_2$ ), 60.1 ( $\text{CH}_2$ , N- $\text{CH}_2$ ), 58.9 (CH,  $\beta$ -lactam), 57.3 ( $\text{CH}_2$ , O- $\text{CH}_2$ ), 43.6 ( $\text{CH}_2$ , Ph- $\text{CH}_2$ ), 37.5 ( $\text{CH}_3$ , N- $\text{CH}_3$ ), 32.1 ( $\text{CH}_3$ ), 27.6 ( $\text{CH}_3$ ). IR (KBr):  $\nu_{\text{max}}$  1782, 1749, 1678, 1447, 1201, 1180, 1153, 695  $\text{cm}^{-1}$ . HRMS (ESI)  $m/z$  calculated for  $\text{C}_{27}\text{H}_{29}\text{I}_2\text{N}_5\text{O}_4\text{PdS}$ : 879.906 [ $\text{M-py} + \text{H}$ ] $^+$ ; found 879.915. Mp: 148–152  $^\circ\text{C}$ .  $[\alpha]_{\text{D}}^{25} = +14.01$  (c 0.40,  $\text{CHCl}_3$ ).

### Catalysis experiments.

#### *General procedure for the cycloisomerisation of enyne 23.*<sup>7</sup>

Gold carbene complex (0.006 mmol, 3 mol%) and Sodium tetrakis[3,5-bis(trifluoromethyl)phenyl]borate (NaBARF) (0.006 mmol, 3 mol%) were stirred under Ar in 2 mL of anhydrous  $\text{CH}_2\text{Cl}_2$  for 15 min. A solution of enyne **23** (0.2 mmol, 1.0 equiv) in 2 mL of anhydrous  $\text{CH}_2\text{Cl}_2$  was added in one portion to the resulting slurry. The reaction mixture was stirred at rt until completion of the reaction (TLC). The reaction crude was filtered through a short pad of Celite and  $\text{SiO}_2$ , the solvent was removed under *vacuum* and the residue was purified through a short pad of  $\text{SiO}_2$ .

#### *General procedure for hydrosilylation of alkynes.*<sup>8</sup>

To a solution of catalyst (5 mg, 0.005 mmol, 1 mol%) in toluene (3 mL), phenylacetylene (54  $\mu\text{L}$ , 0.49 mmol, 1.0 equiv) and triethylsilane (86  $\mu\text{L}$ , 0.54 mmol, 1.1 equiv) were quickly added via syringe. After stirring at 100 $^\circ\text{C}$  for 14 h the reaction was stopped and allowed to reach rt. The crude mixture was filtered through a short pad of  $\text{SiO}_2$  and the solvent was removed under *vacuum*. The resulting mixtures were analysed by  $^1\text{H}$  NMR spectroscopy.

## Crystallographic data for 15:

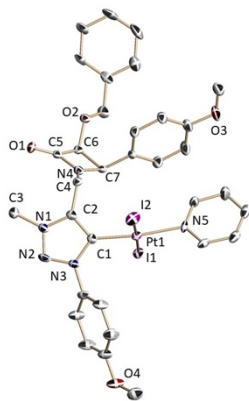

All data were collected at low temperature using oil-coated shock-cooled crystals at 120(2) K on a Bruker-AXS APEX II diffractometer with MoK $\alpha$  radiation ( $\lambda = 0.71073$  Å). The structure was solved by direct<sup>9</sup> and all non hydrogen atoms were refined anisotropically using the least-squares method on  $F^2$ .<sup>10</sup>

Only one of three independent molecules present in the asymmetric unit is depicted as thermal ellipsoid plot at the 50% level. Hydrogen atoms and disorders of the pyridine ligand and of the benzyl group connected to O2 are omitted for clarity. Selected bond lengths [Å] and angles [°]: Pt1-C1 1.974(7), Pt1-I1 2.599(1), Pt1-I2 2.596(1), Pt1-N5 2.133(15), I1-Pt1-I2 178.2(1), C1-Pt1-N5 172.4(6), C1-Pt1-I1 87.9(2), C1-Pt1-I2 90.3(2), I1-Pt1-N5 91.2(9), I2-Pt1-N5 90.6(9).

**15:** C<sub>33</sub>H<sub>33</sub>I<sub>2</sub>N<sub>5</sub>O<sub>4</sub>Pt, Mr = 1012.53, crystal size = 0.40 x 0.40 x 0.10 mm<sup>3</sup>, triclinic, space group  $P\bar{1}$ ,  $a = 12.5954(5)$  Å,  $b = 20.4792(8)$  Å,  $c = 21.2634(9)$  Å,  $\alpha = 91.735(2)^\circ$ ,  $\beta = 106.457(2)^\circ$ ,  $\gamma = 94.822(2)^\circ$ ,  $V = 5233.0(4)$  Å<sup>3</sup>,  $Z = 6$ , 184964 reflections collected, 28040 unique reflections ( $R_{\text{int}} = 0.0747$ ),  $R_1 = 0.0501$ ,  $wR_2 = 0.0930$  [ $I > 2\sigma(I)$ ],  $R_1 = 0.0954$ ,  $wR_2 = 0.1197$  (all data), residual electron density = 4.102 e Å<sup>-3</sup>.

CCDC 2110874 contains the supplementary crystallographic data. These data can be obtained free of charge from The Cambridge Crystallographic Data Centre via [www.ccdc.cam.ac.uk/data\\_request/cif](http://www.ccdc.cam.ac.uk/data_request/cif).

## References

- 1 Muntaner, J. G.; Casarrubios, L.; Sierra, M. A. *Synthesis of new Bioorganometallic Ir-and Rh-Complexes Having  $\beta$ -Lactam Containing Ligands*. *Org. Biomol. Chem.* **2014**, *12*, 286–297.
- 2 Evans, D. A.; Sjogren, B. E. *The Asymmetric Synthesis of  $\beta$ -Lactam Antibiotics - I. Application of Chiral Oxazolidones in The Staudinger Reaction*. *Tetrahedron Letters* **1985**, *26*, 3783–3786.
- 3 Usifoh, C. O.; Lambert, D. M.; Wouters, J.; Scriba, G. K. E. *Synthesis and Anticonvulsant Activity of N,N-Phthaloyl Derivatives of Central Nervous System Inhibitory Amino Acids*. *Archiv der Pharmazie* **2001**, *334*, 323–331.
- 4 Wilkening, I.; Signore, G. D.; Hackenberger, C. P. R. *Synthesis of Phosphoramidate Peptides by Staudinger Reactions of Silylated Phosphinic Acids and Esters*. *Chem. Commun.* **2011**, *47*, 349–351.

- 5 Alvarez, S. G.; Alvarez, M. T. *A Practical Procedure for The Synthesis of Alkyl Azides at Ambient Temperature in Dimethyl Sulfoxide in High Purity and Yield. Synthesis* **1997**, 413–414.
- 6 Maity, R.; Tichter, T.; van der Meer, M.; Sarkar, B. *C–H activation in Ir<sup>III</sup> and N-Demethylation in Pt<sup>II</sup> Complexes with Mesoionic Carbene Ligands: Examples of Monometallic, Homobimetallic and Heterobimetallic Complexes. Dalton Trans.*, **2015**, 44, 18311–18315.
- 7 Frutos, M.; Avello, M. G.; Viso, A.; Fernández de la Pradilla, R.; de la Torre, M. C.; Sierra, M. A.; Gornitzka, H.; Hemmert, C. *Gold Sulfinyl Mesoionic Carbenes: Synthesis, Structure, and Catalytic Activity. Org. Lett.* **2016**, 18, 3570–3573.
- 8 Hu, J. J.; Li, F.; Hor, T. S. A. *Novel Pt (II) Mono-and Biscarbene Complexes: Synthesis, Structural Characterization and Application in Hydrosilylation Catalysis. Organometallics* **2009**, 28, 1212–1220.
- 9 Sheldrick, G. M. *Phase annealing in SHELX-90: direct methods for larger structures. Acta Crystallographica Section A* **1990**, 46(6), 467-473.
- 10 Sheldrick, G. M. *Crystal structure refinement with SHELXL. Acta Crystallographica Section C: Structural Chemistry* **2015**, 71(1), 3-8.

## **<sup>1</sup>H and <sup>13</sup>C NMR Spectra**

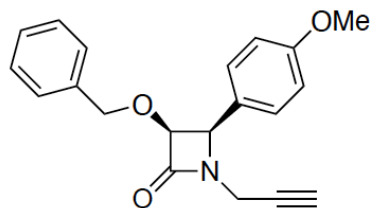

*cis*-8a

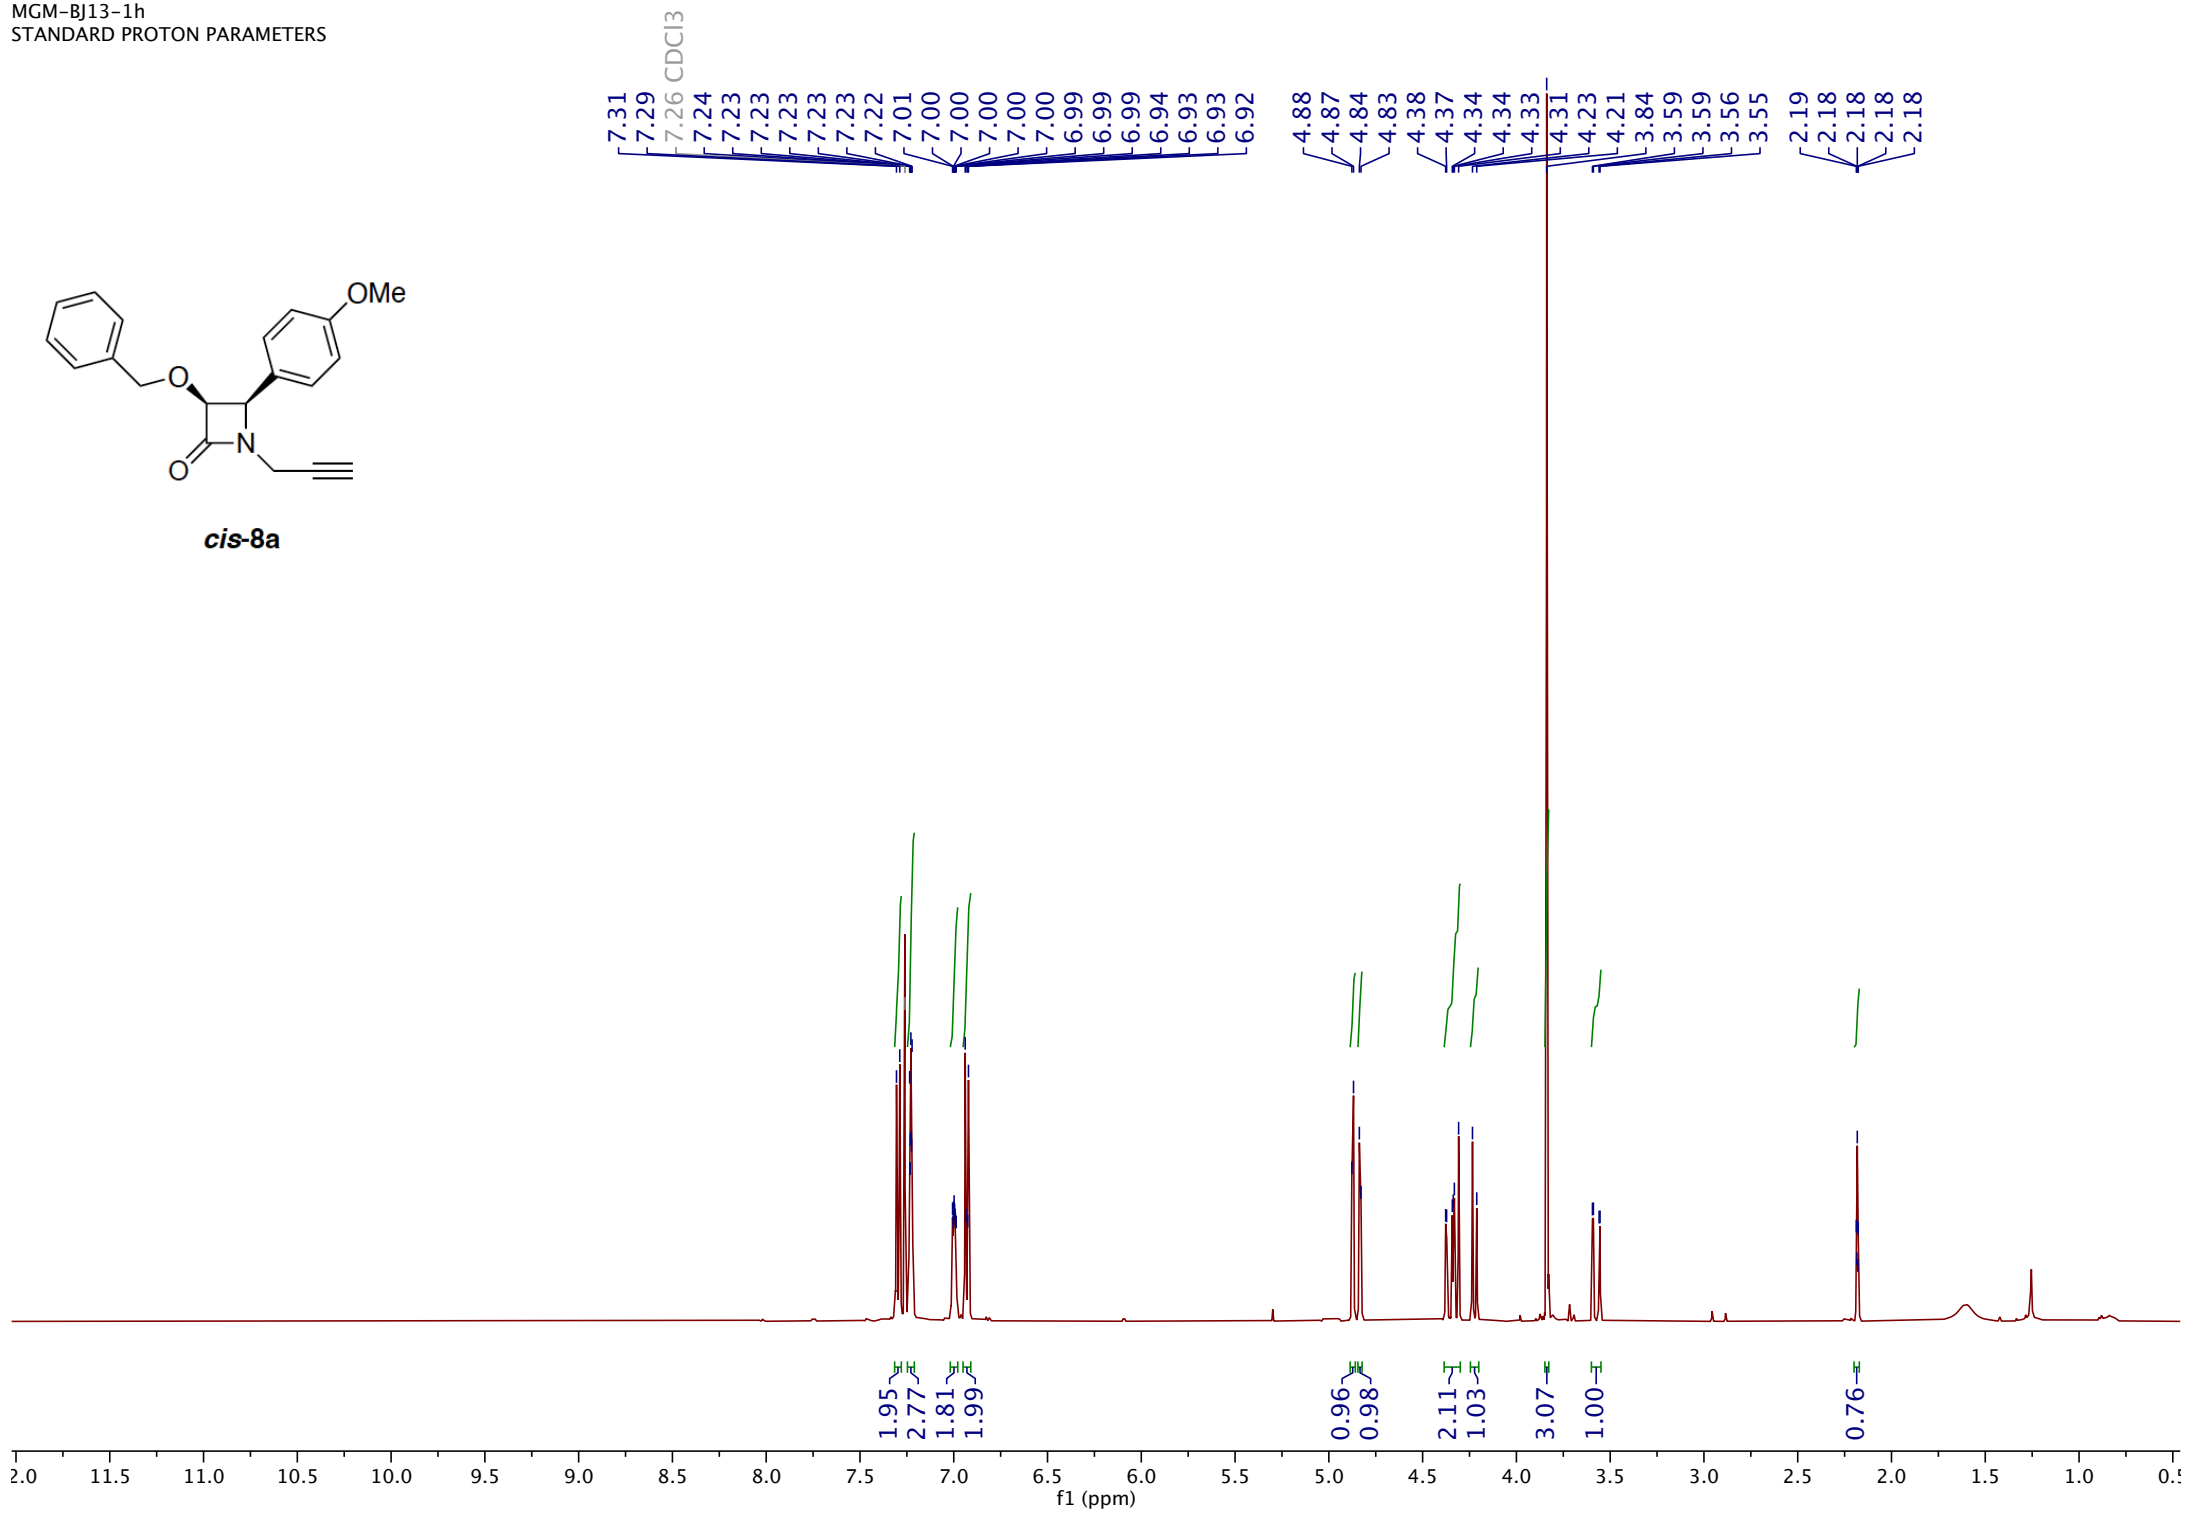

MGM-BJ13-13c  
STANDARD PROTON PARAMETERS

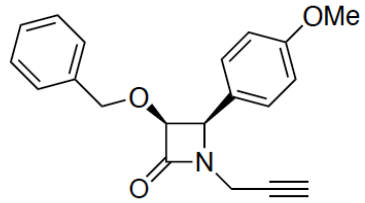

***cis-8a***

—166.52  
—160.20  
—136.51  
—129.99  
—128.40  
—128.29  
—128.06  
—125.24  
—114.09  
—83.85  
77.16 CDCl<sub>3</sub>  
—76.29  
—72.82  
—72.38  
—61.19  
—55.49  
—29.42

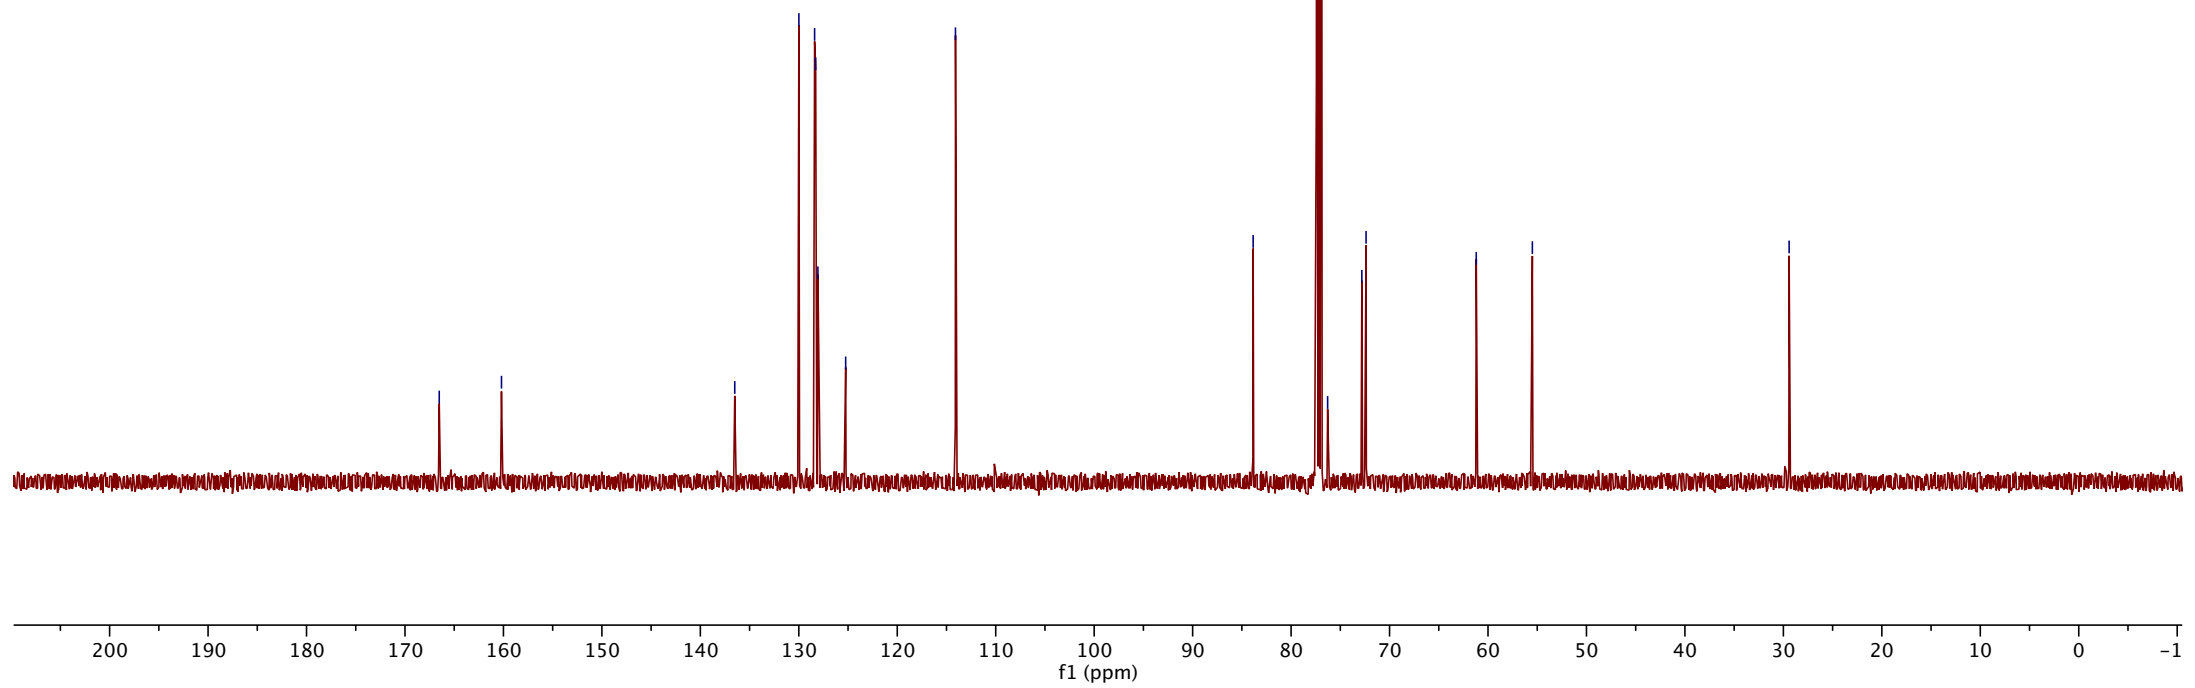

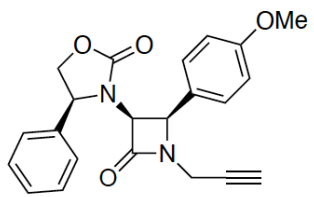

*cis*-8b

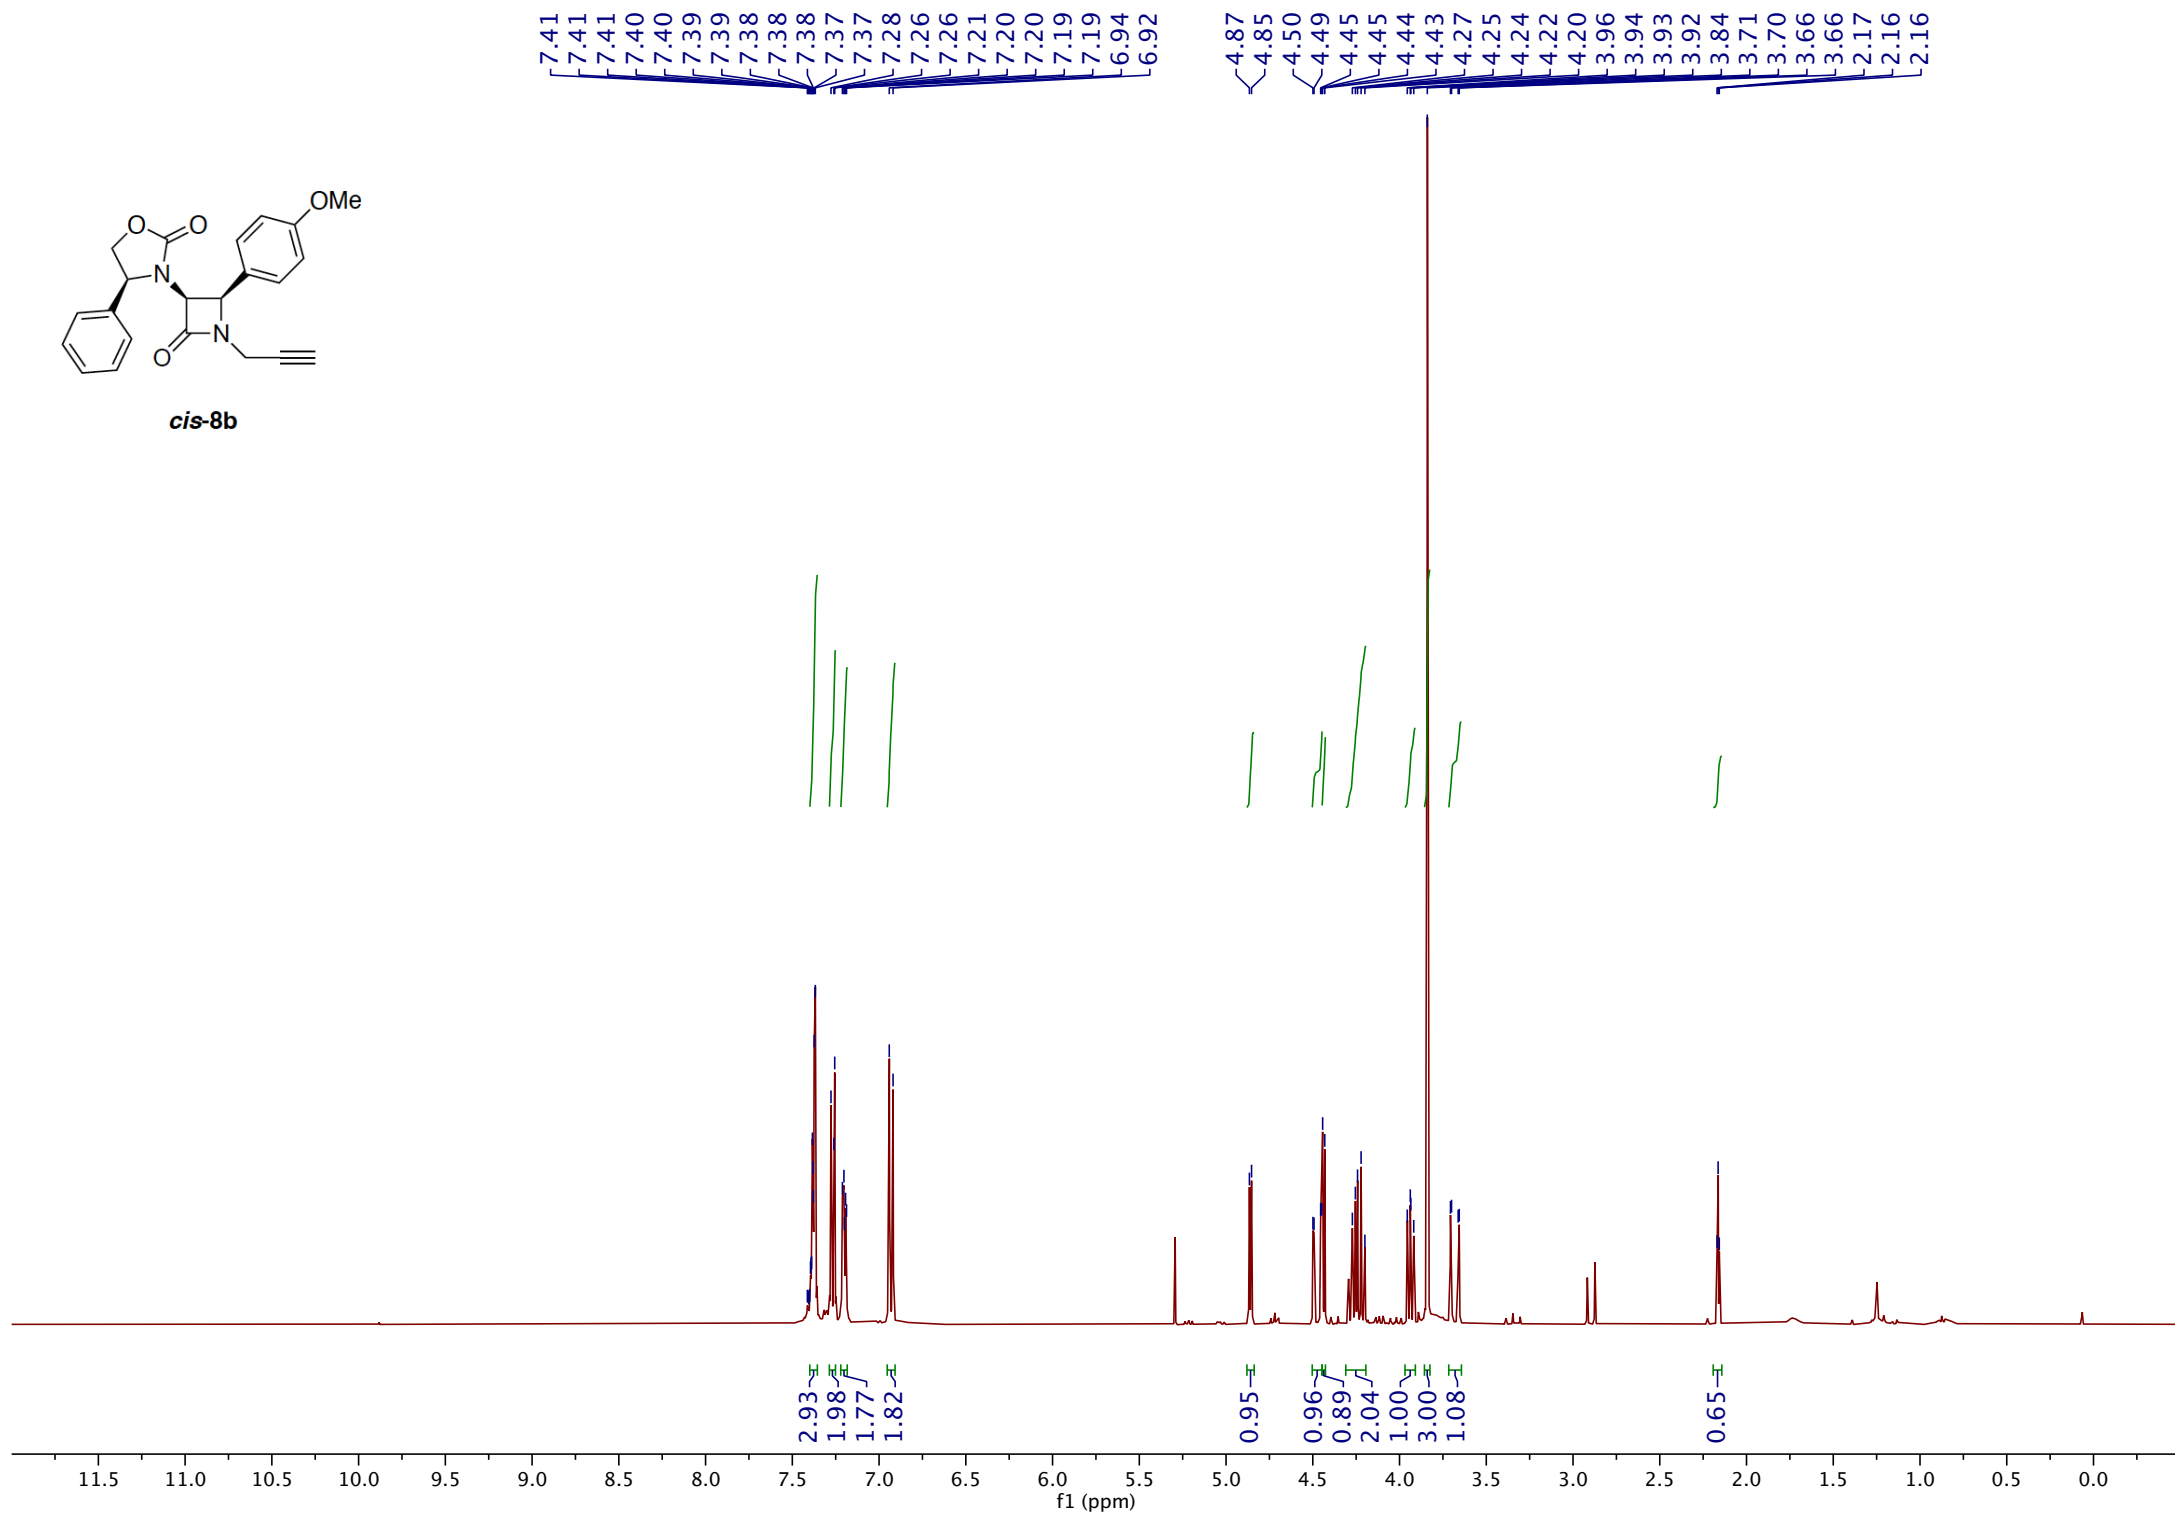

MGM921B  
single pulse decoupled gated NOE

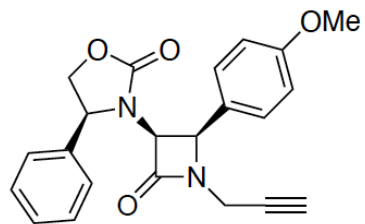

*cis*-8b

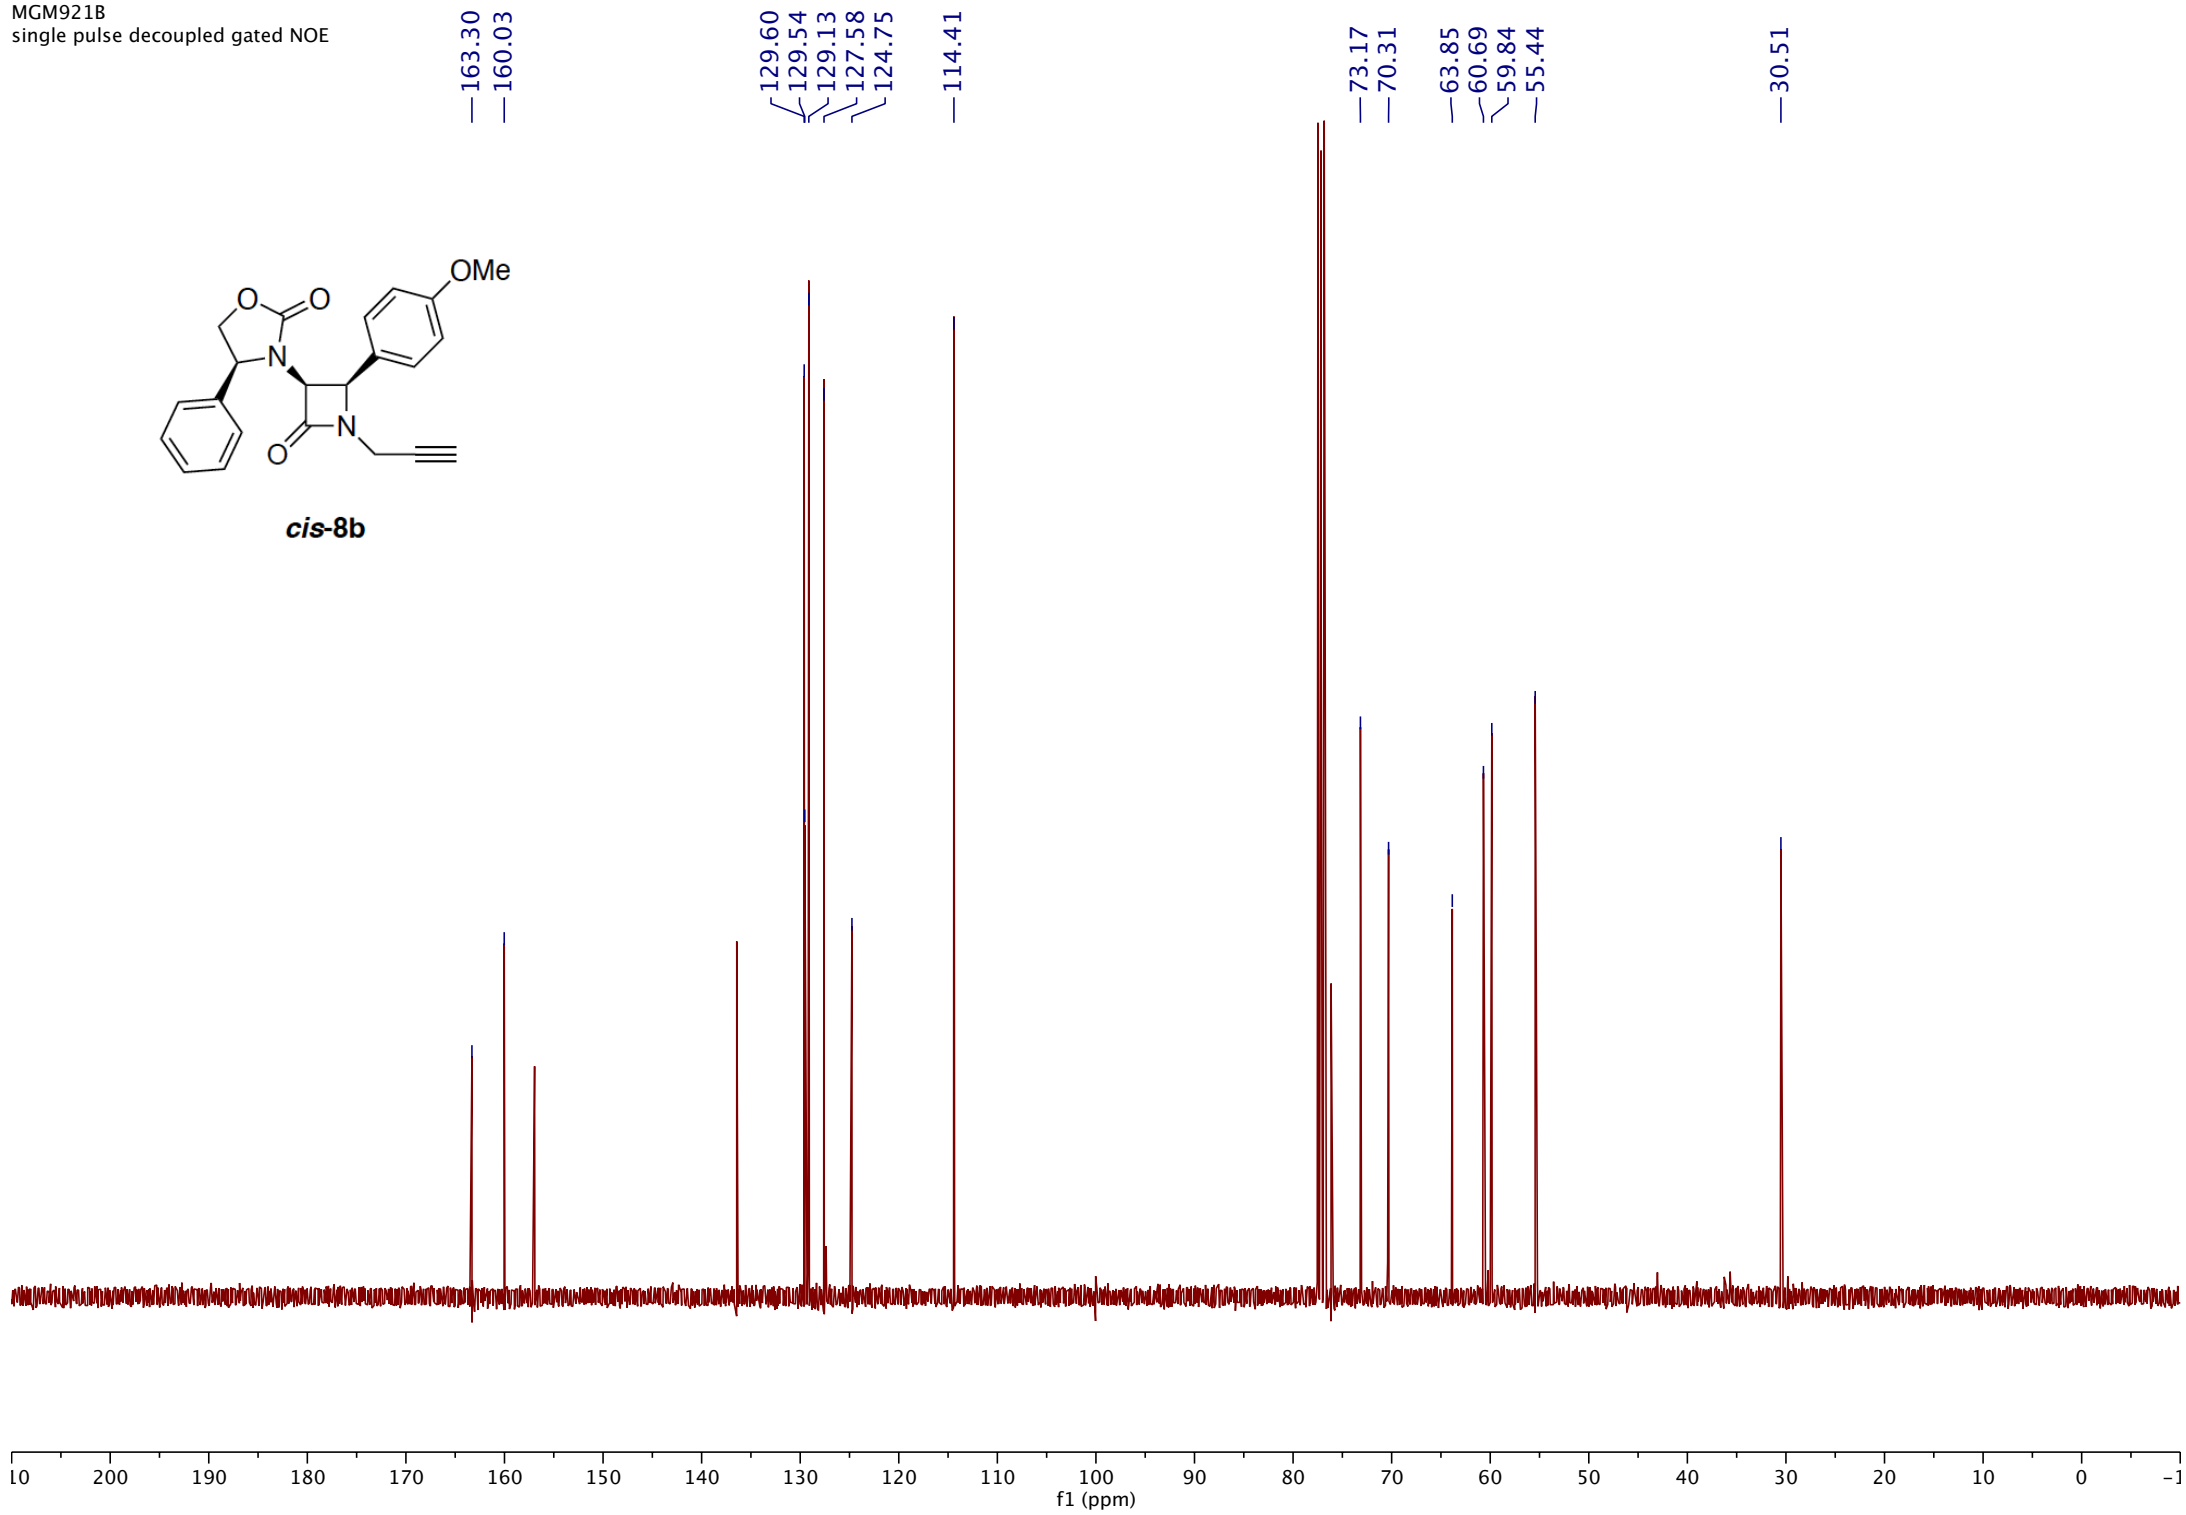

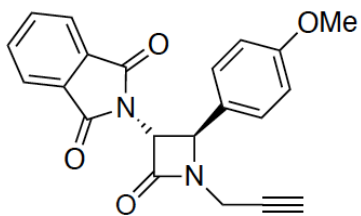

*trans*-8c

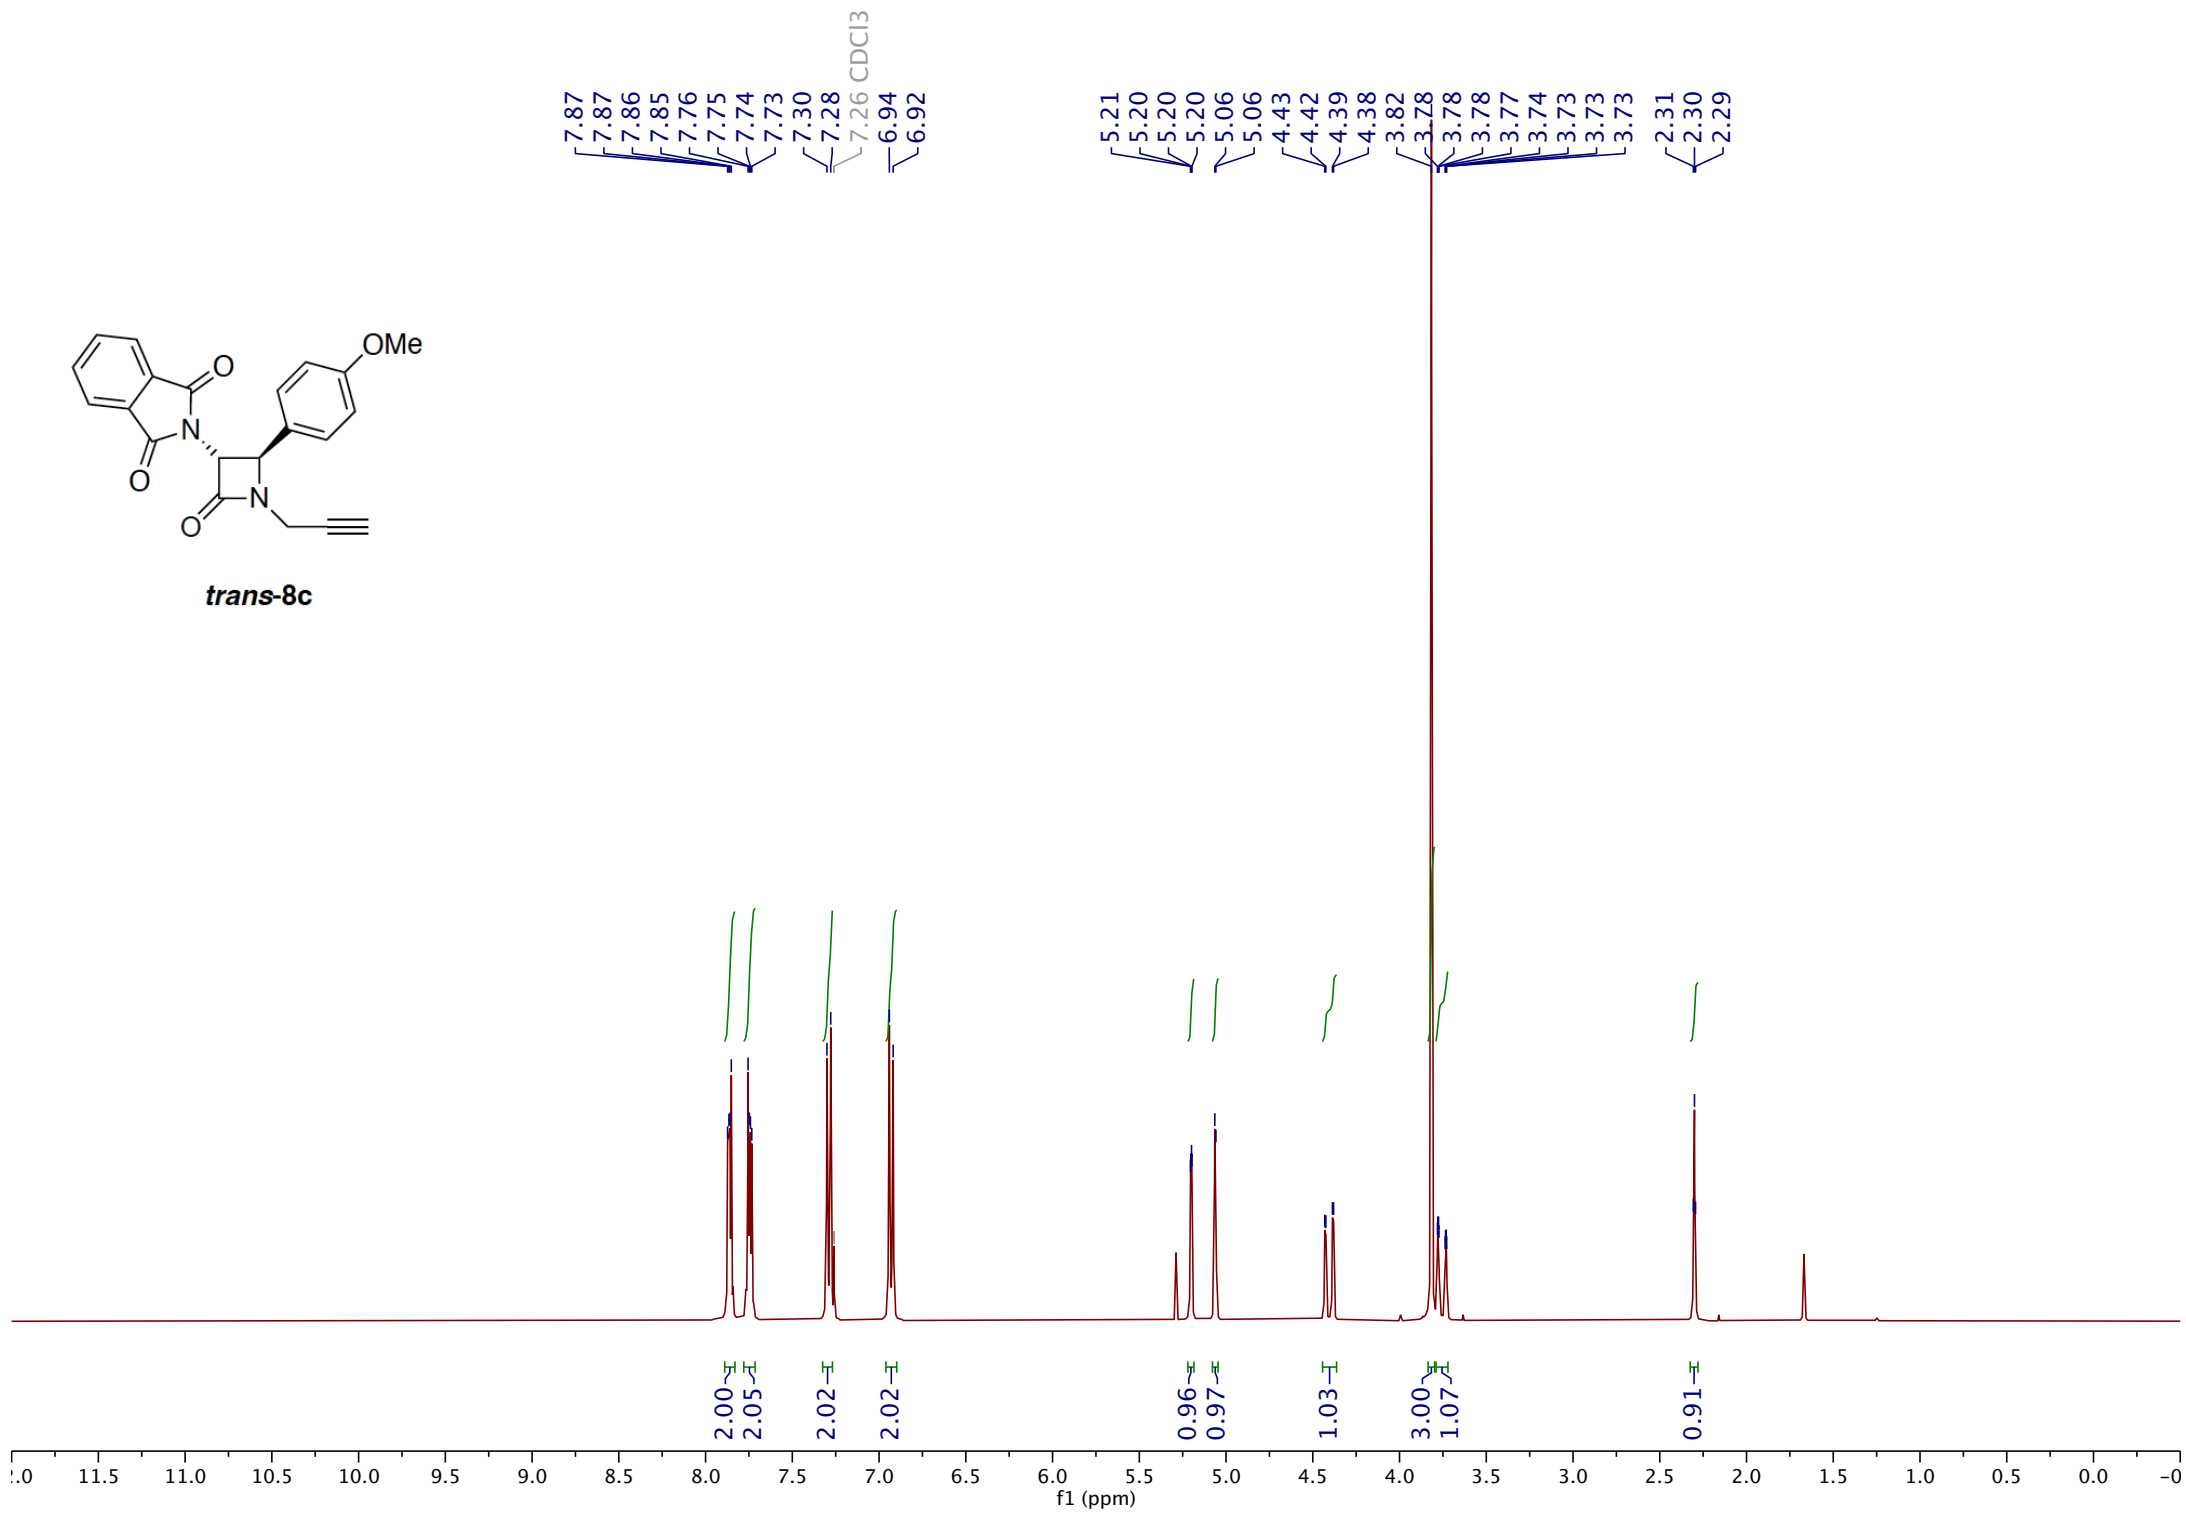



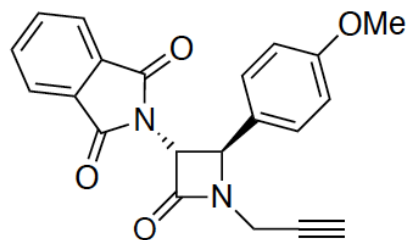***trans*-8c**

~166.93  
~164.65  
~160.44

~134.62  
~131.84  
~128.22  
~127.15  
~123.87

~114.71

~77.16 CDCl<sub>3</sub>  
~75.85  
~73.15

~62.59  
~60.40  
~55.49

~30.60

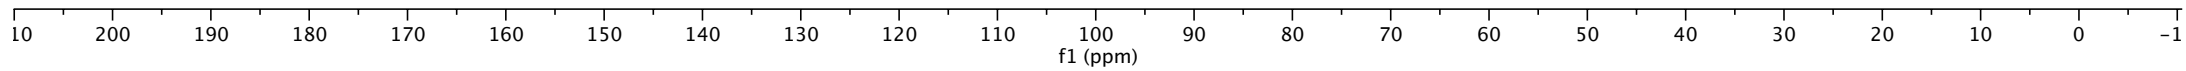

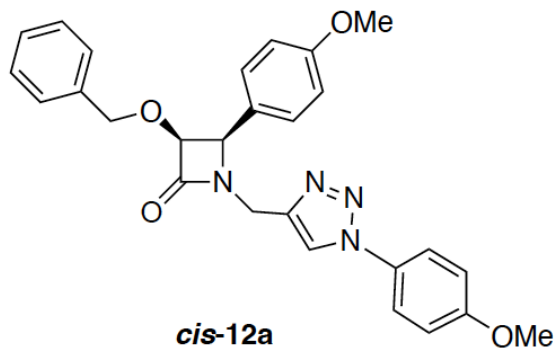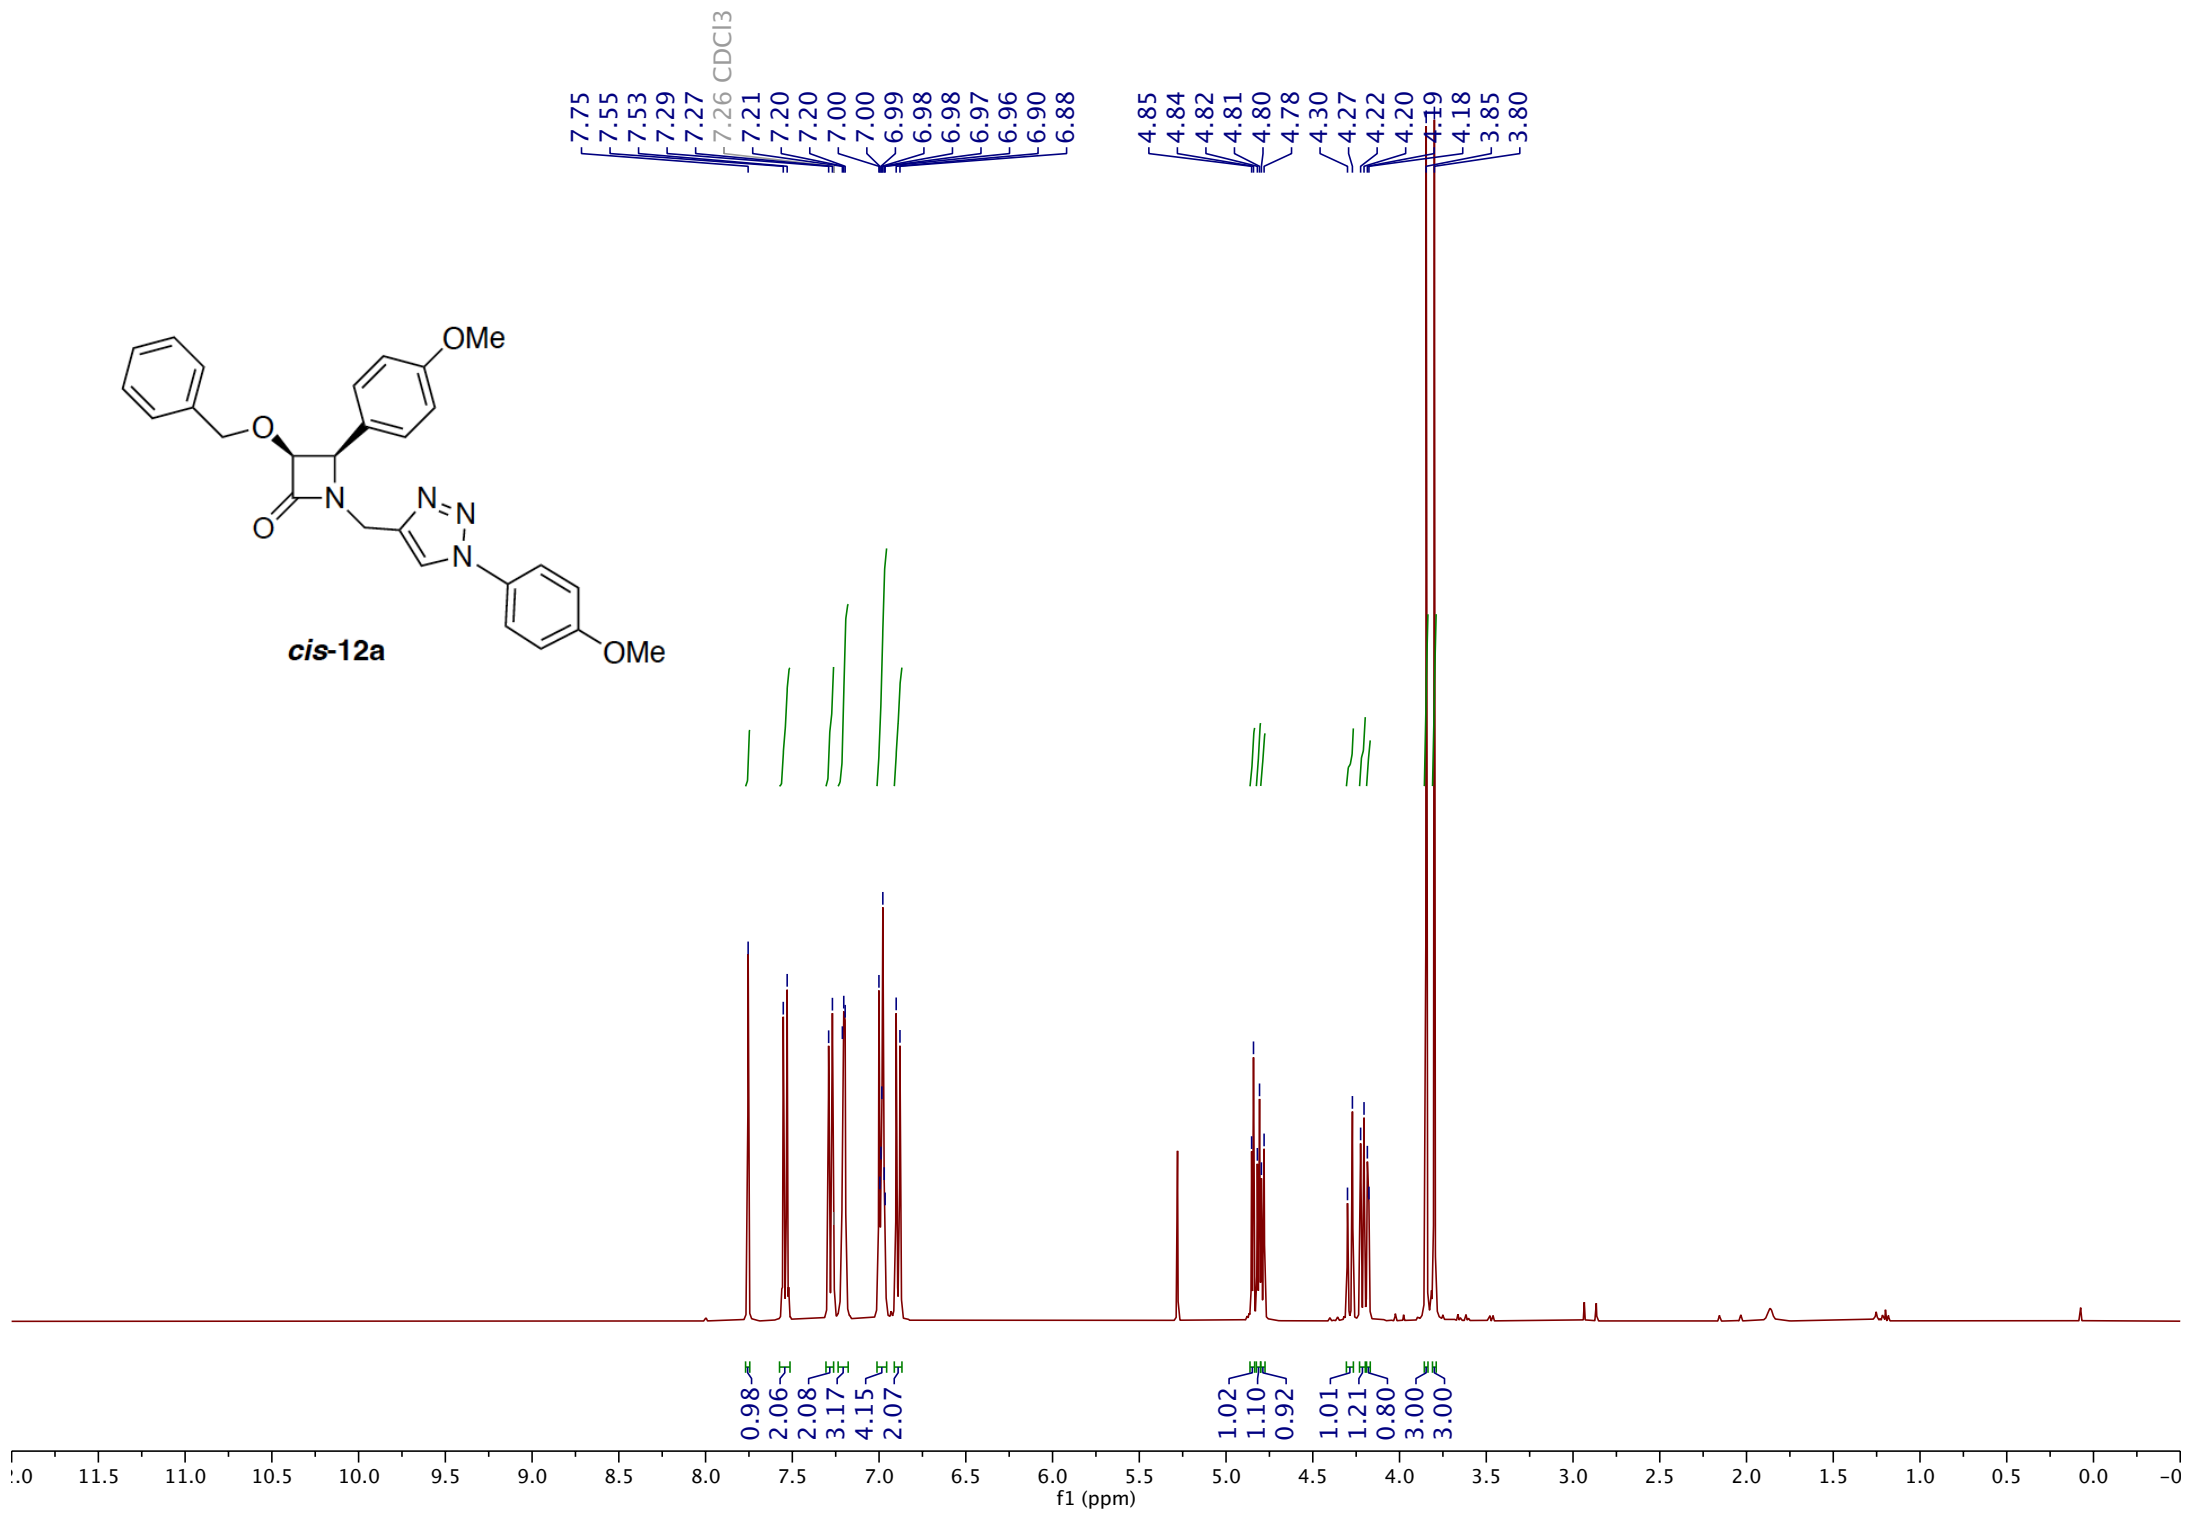

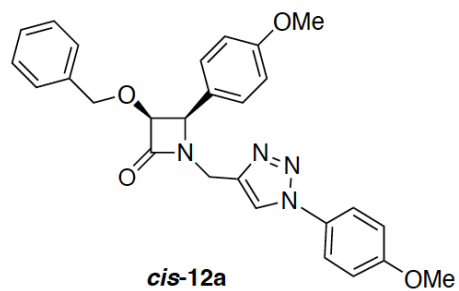

— 166.96

— 160.05

— 159.97

— 142.63

— 136.48

— 130.35

— 130.07

— 128.30

— 128.25

— 127.96

— 125.52

— 122.19

— 120.97

— 114.85

— 113.98

— 83.78

— 77.16 CDCl<sub>3</sub>

— 72.30

— 61.94

— 55.72

— 55.40

— 35.39

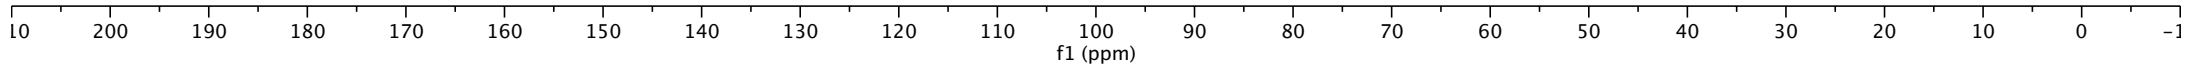

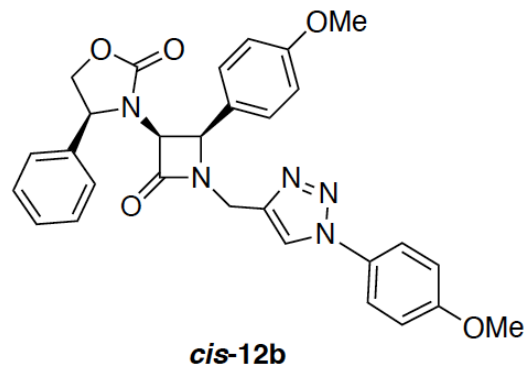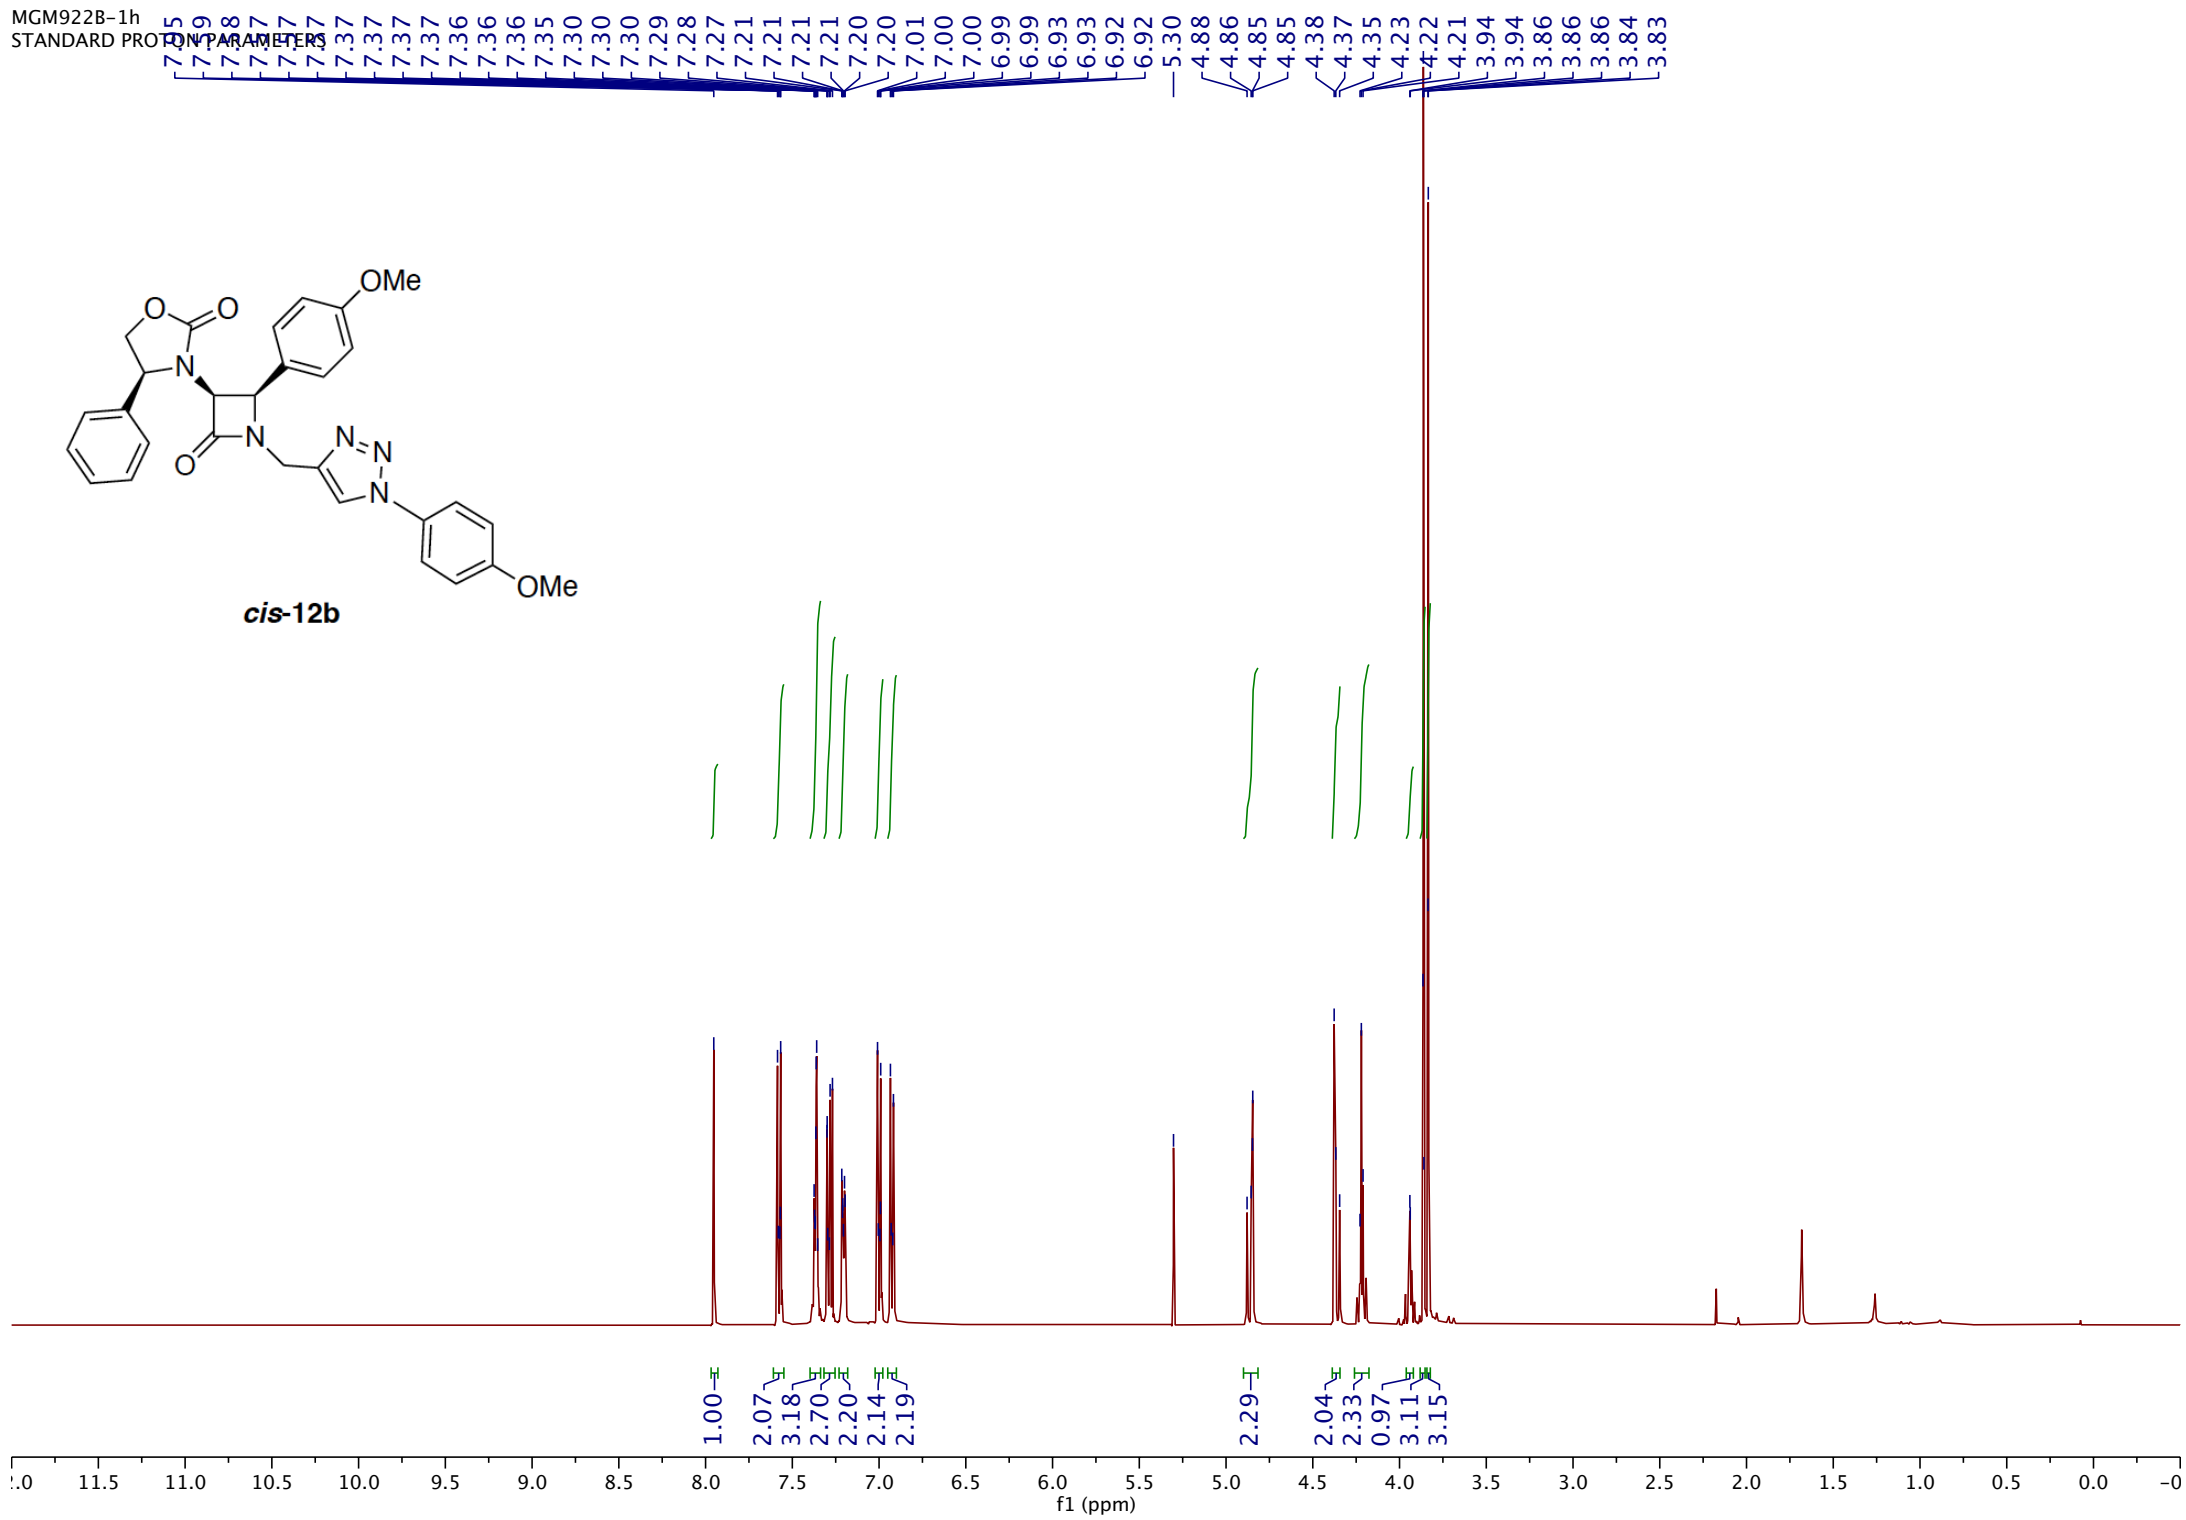

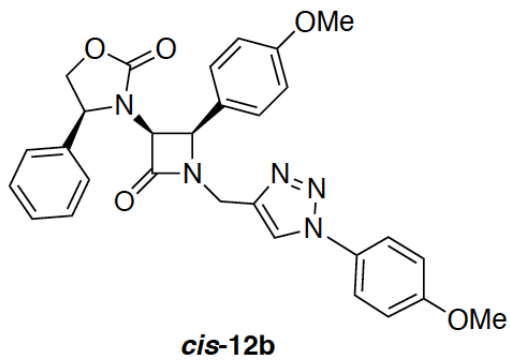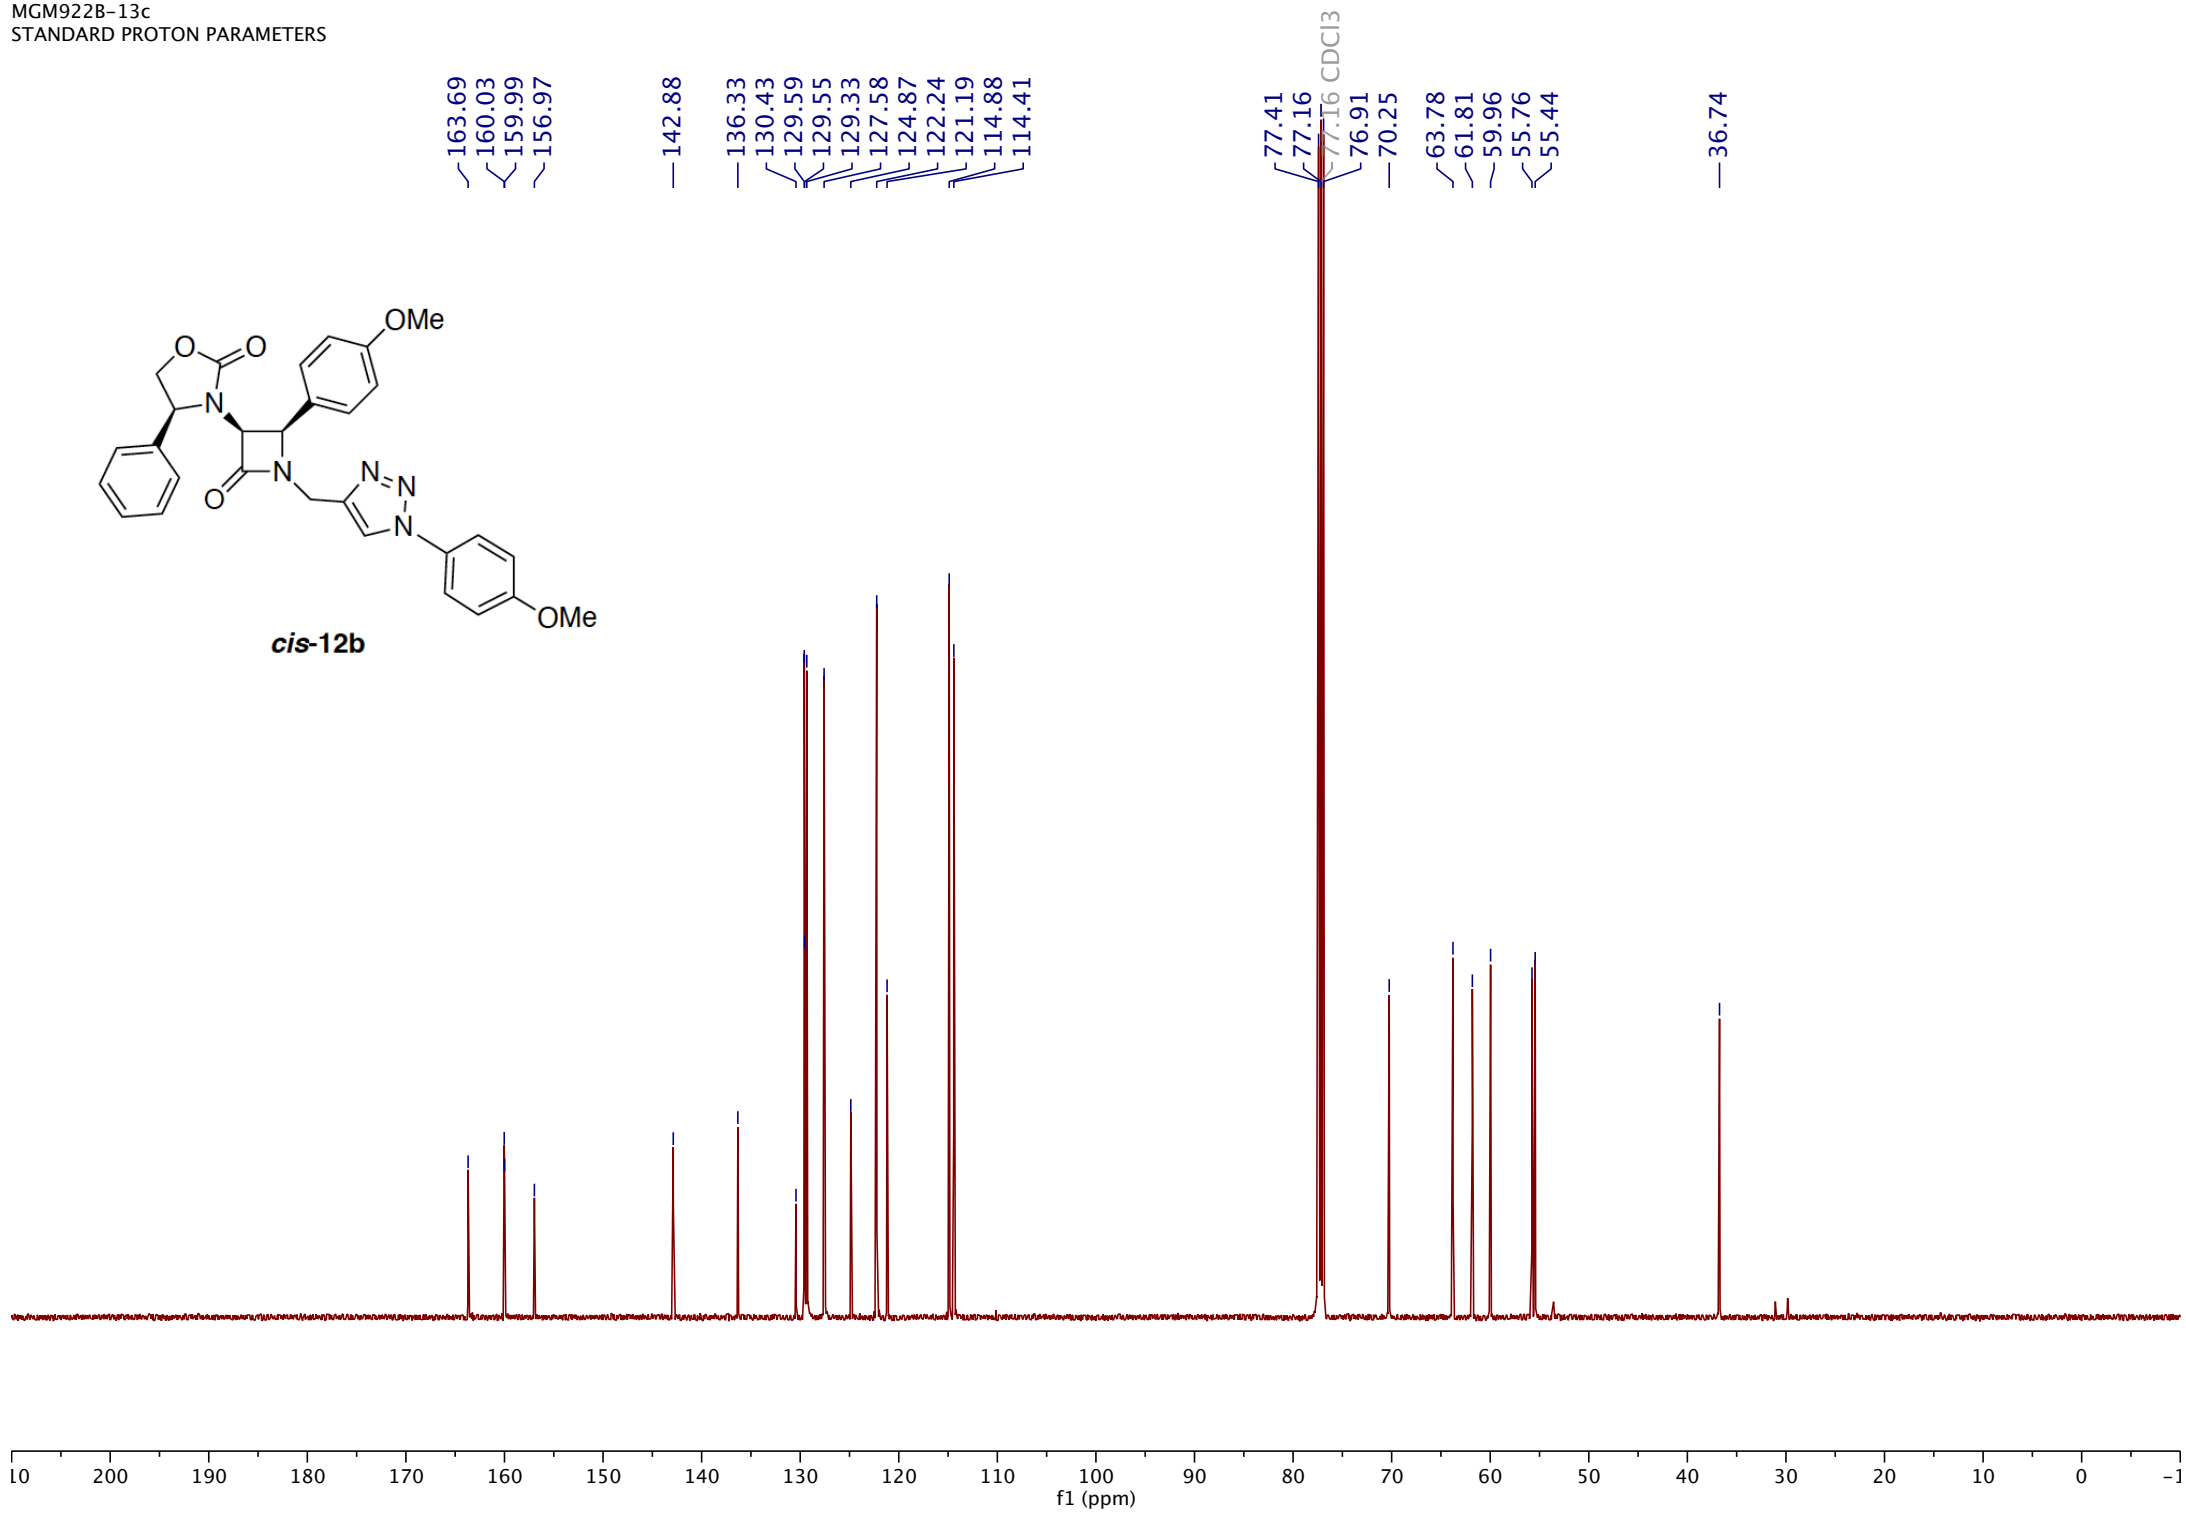

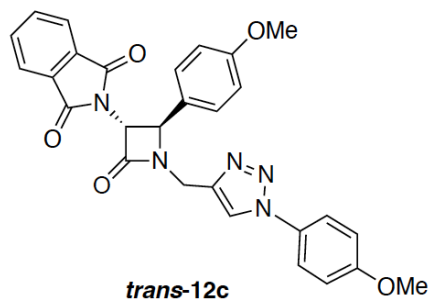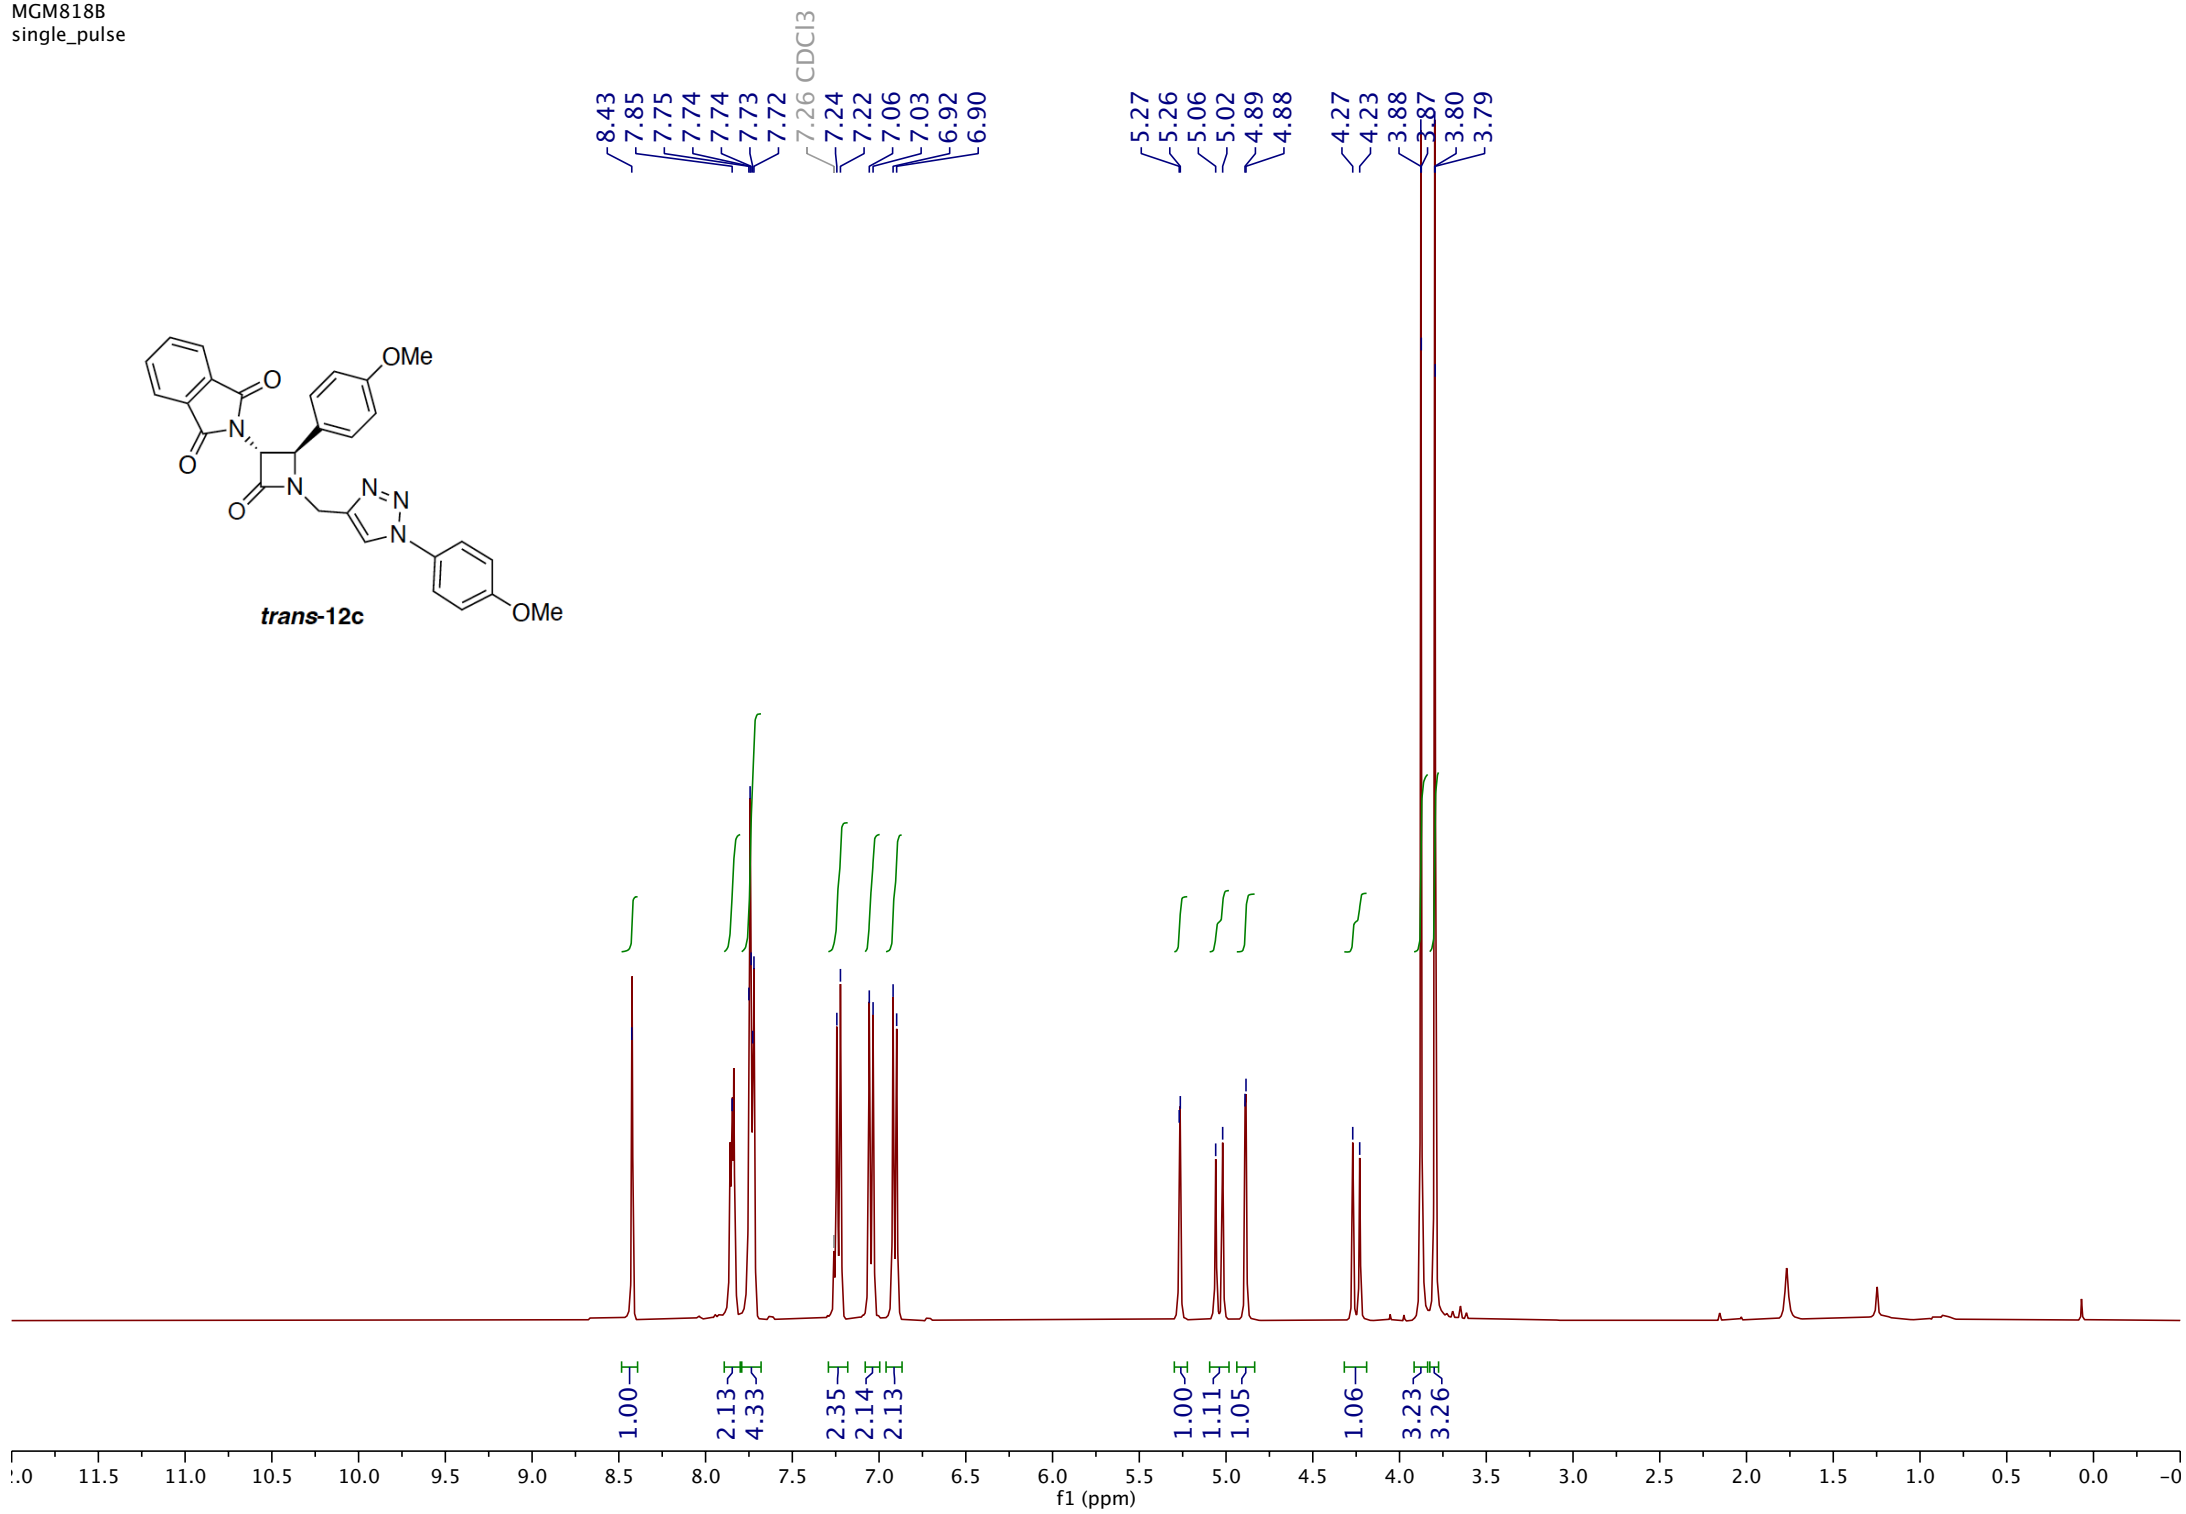

MGM818B  
single pulse decoupled gated NOE

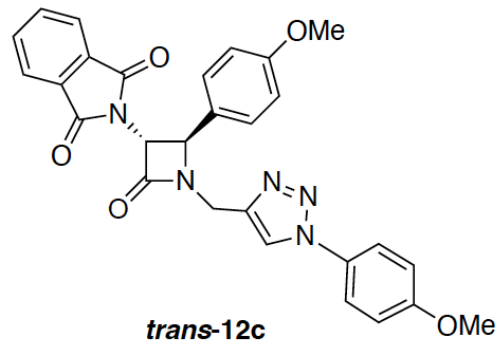

166.99  
164.96  
160.47  
159.89

142.82  
134.63  
131.78  
130.77  
128.23  
126.79  
123.86  
122.19  
121.48  
114.86  
114.81

77.16 CDCl<sub>3</sub>

62.62  
60.22  
55.75  
55.48

36.62

200 190 180 170 160 150 140 130 120 110 100 90 80 70 60 50 40 30 20 10 0 -1  
f1 (ppm)

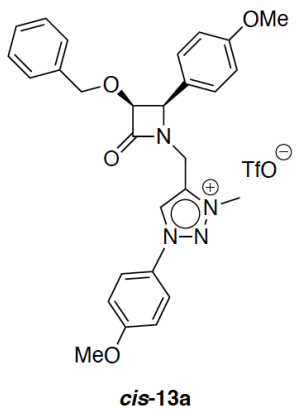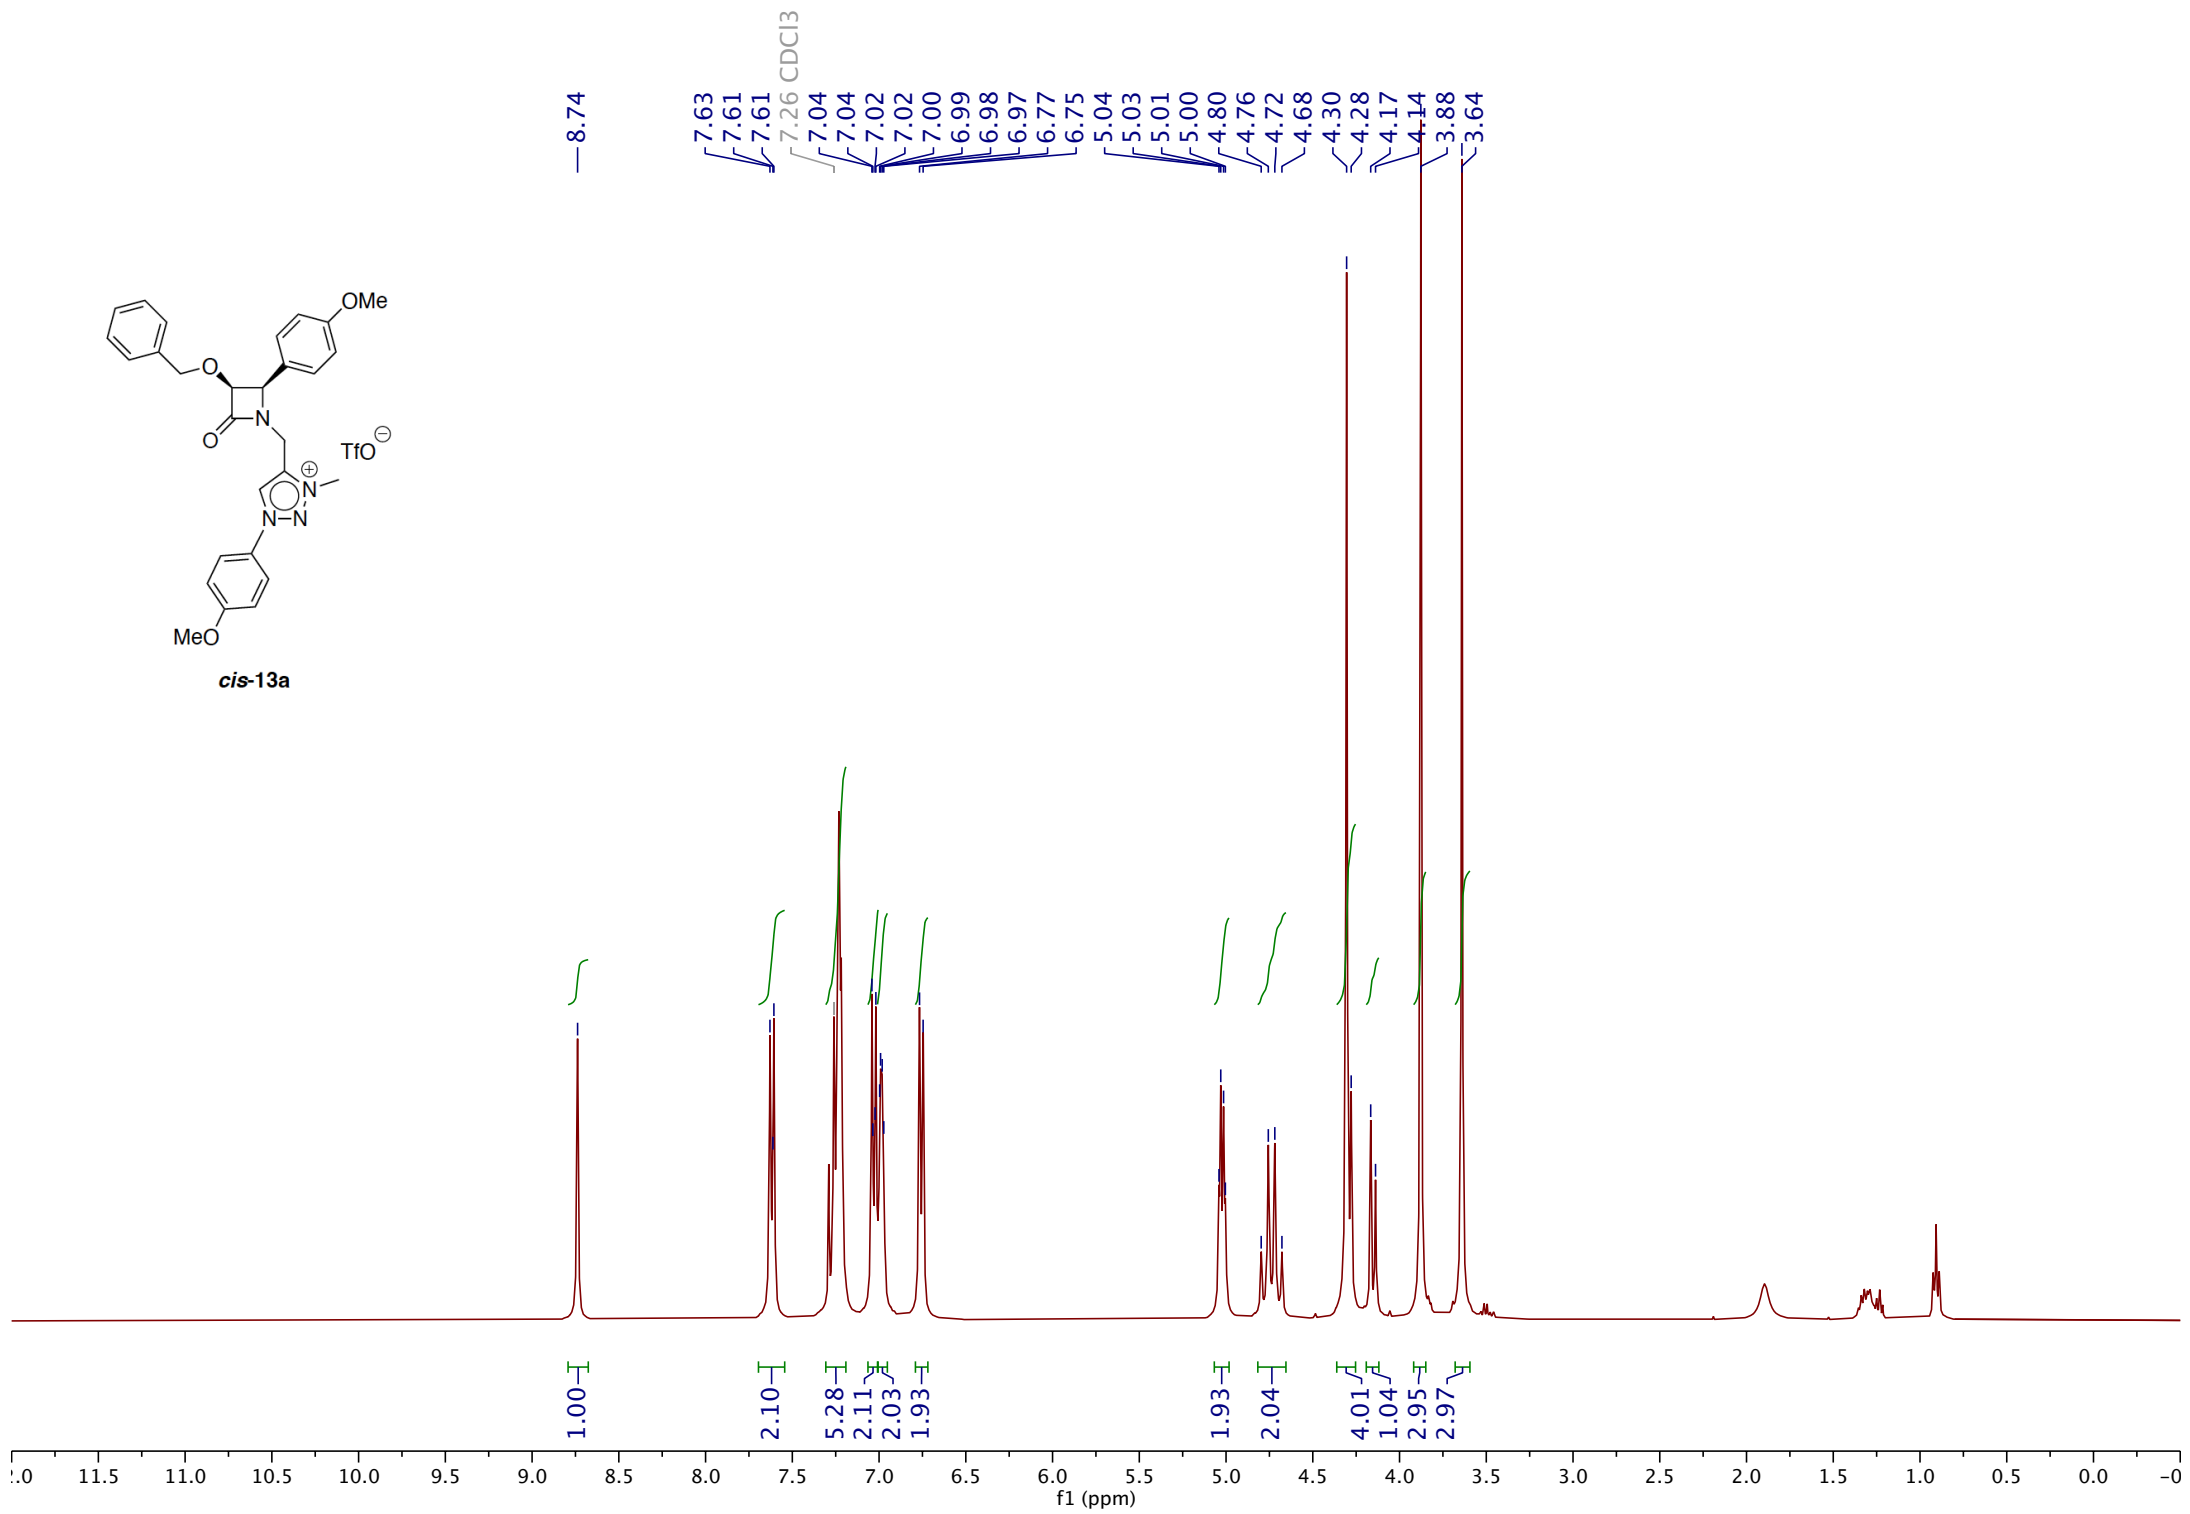



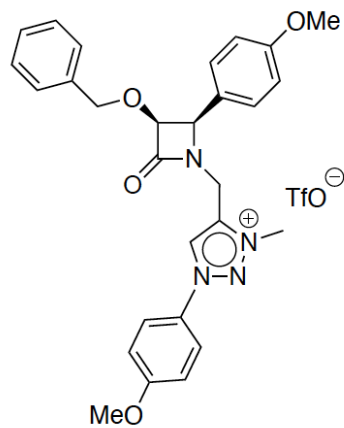***cis*-13a**

167.44  
162.21  
160.08

139.63  
136.21  
130.38  
128.40  
128.35  
128.28  
128.16  
127.54  
125.27  
122.93  
115.43  
113.91

84.08

77.16 CDCl<sub>3</sub>

72.72

62.51

55.97

55.25

38.32

32.89

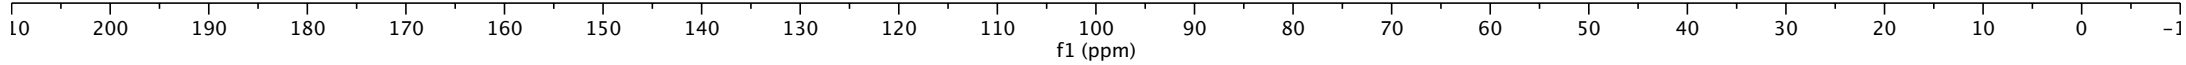

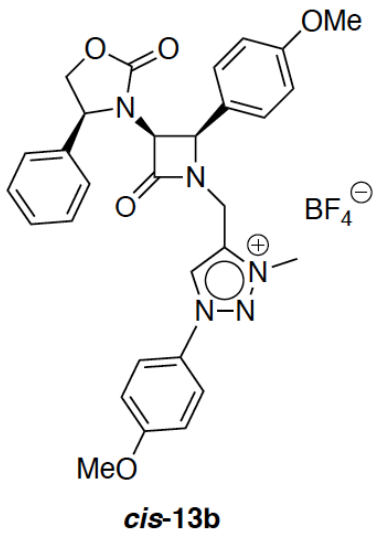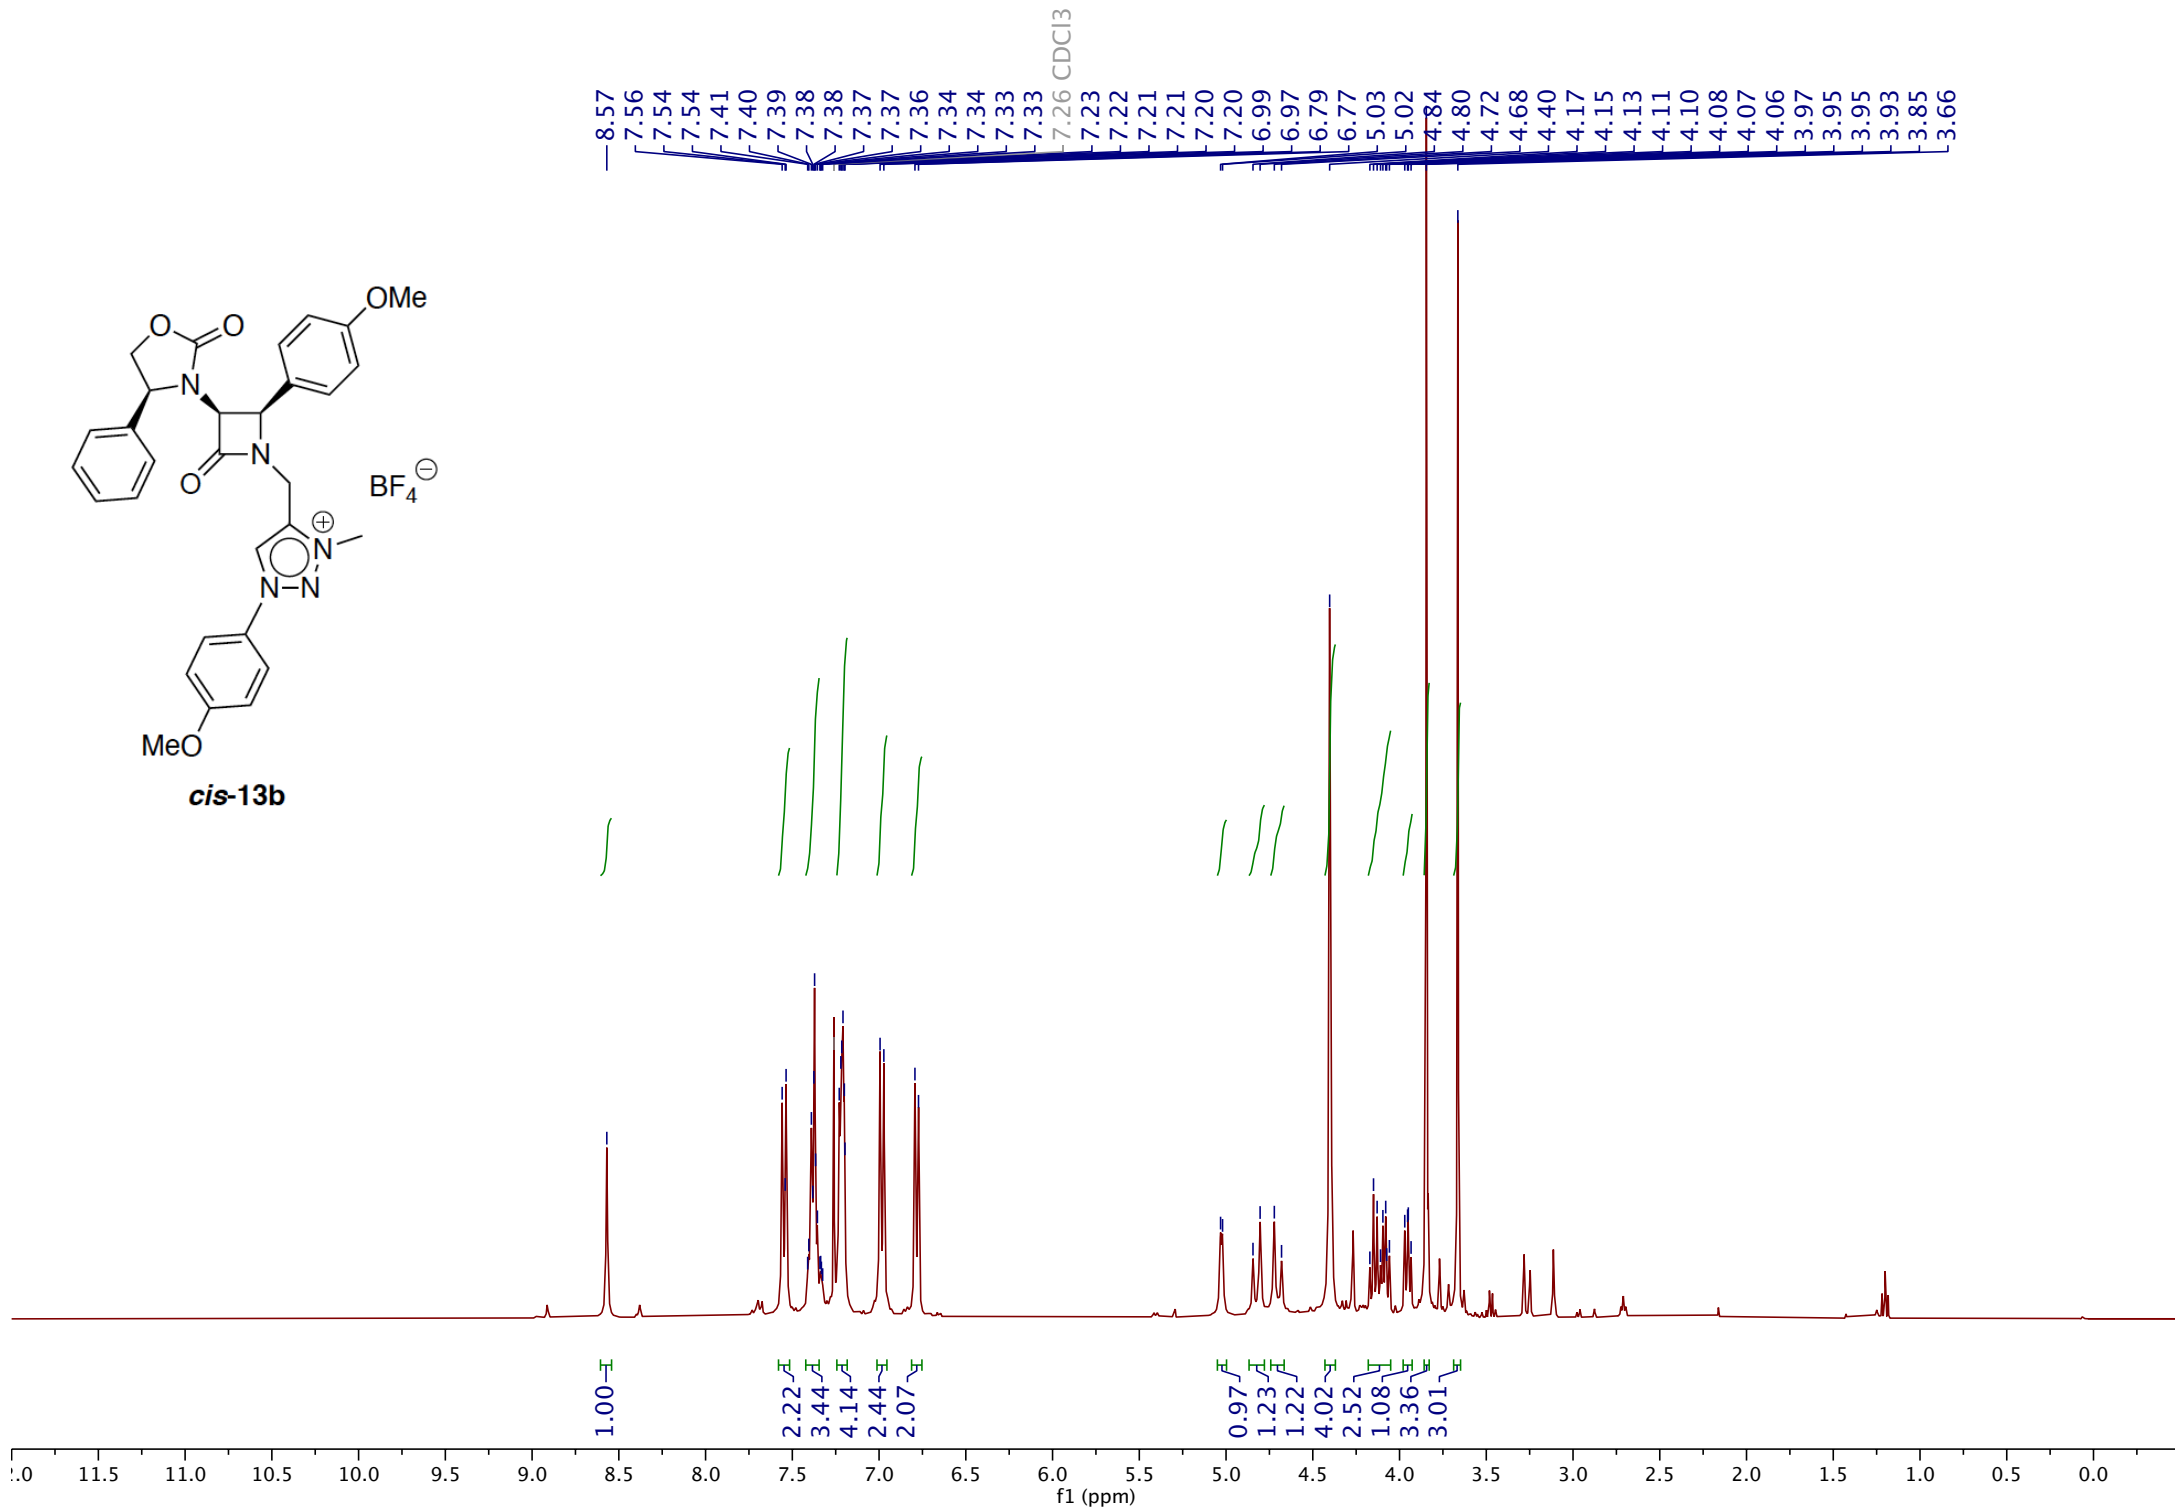

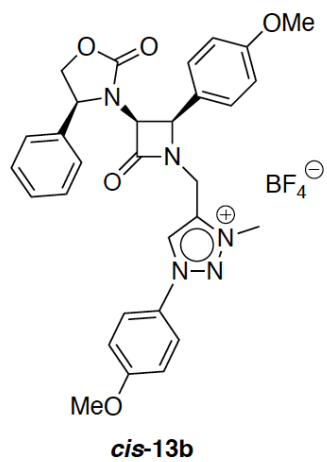

~164.39  
~162.18  
~160.06  
~157.31

~139.84  
~135.98  
~129.73  
~129.60  
~128.00  
~127.66  
~127.38  
~124.48  
~123.06  
~115.44  
~114.32

77.16 CDCl<sub>3</sub>

—70.29  
~63.94  
~63.05  
~60.01  
~55.96  
~55.30

—38.47  
—33.95

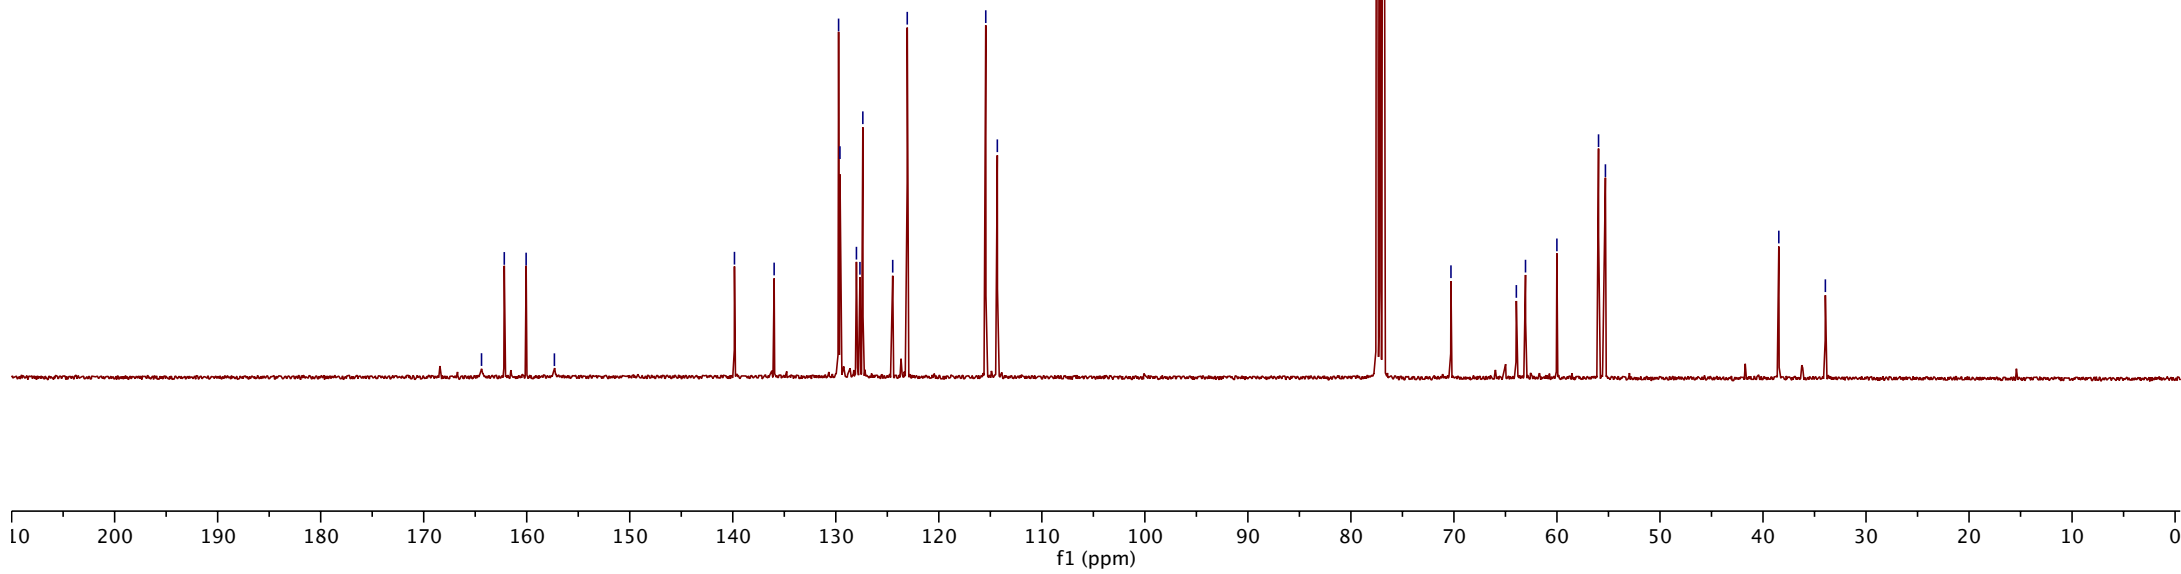

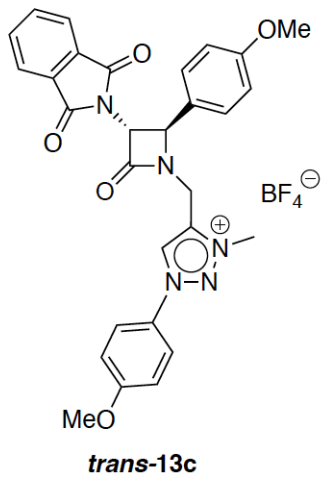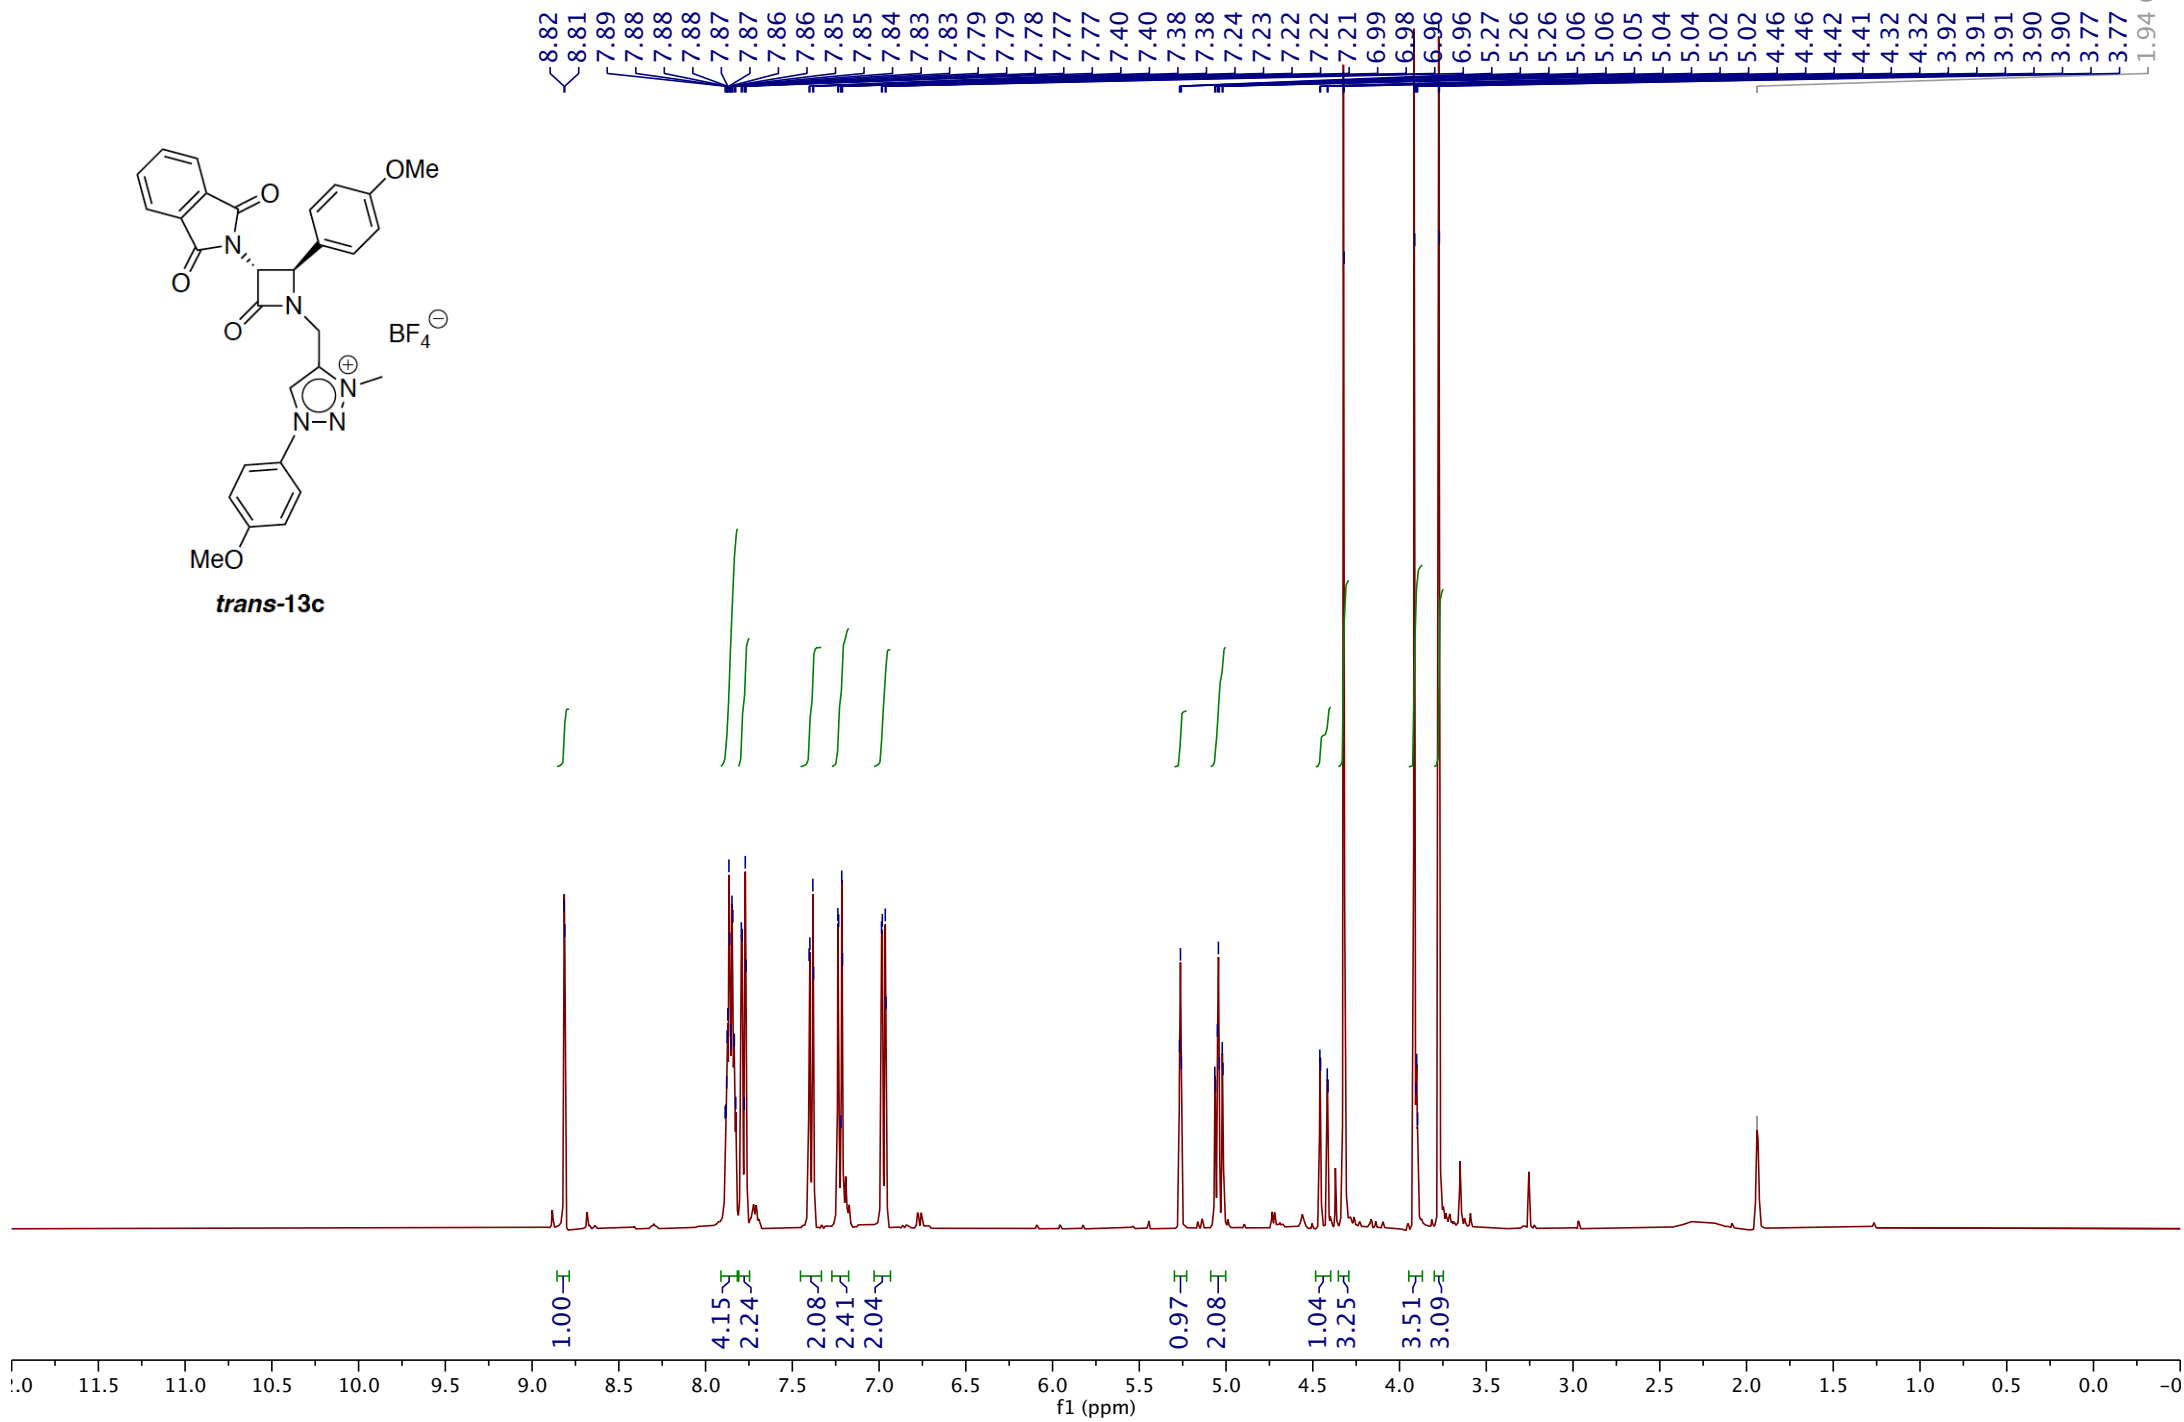

MGM820  
single pulse decoupled gated NOE

168.27  
165.80  
163.29  
161.50

140.65  
135.90  
132.73  
129.70  
128.85  
128.54  
124.53  
124.11  
116.52  
115.48

63.80  
61.43  
56.79  
56.07

39.39  
34.31

1.32 CD3CN

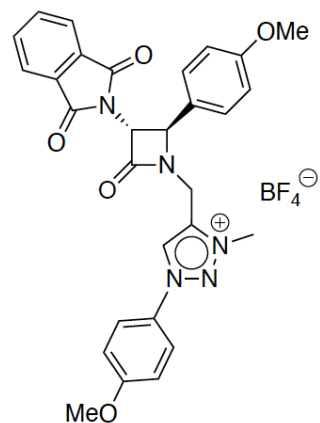

**trans-13c**

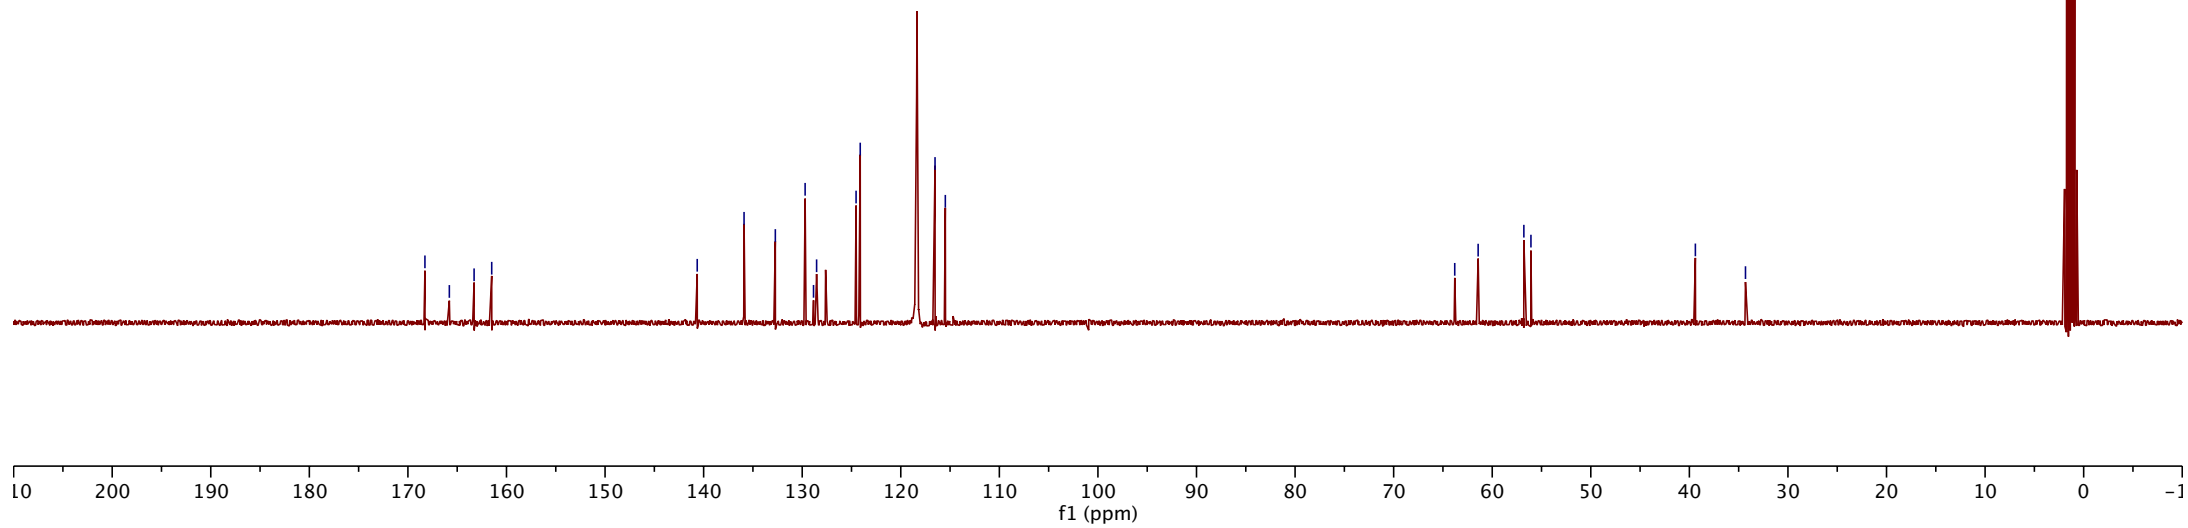

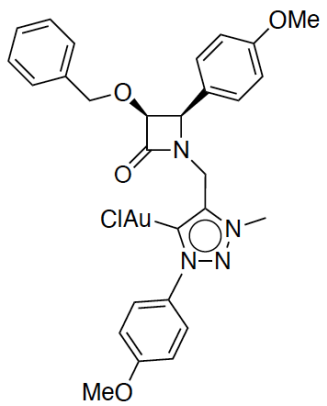

**cis-14a**

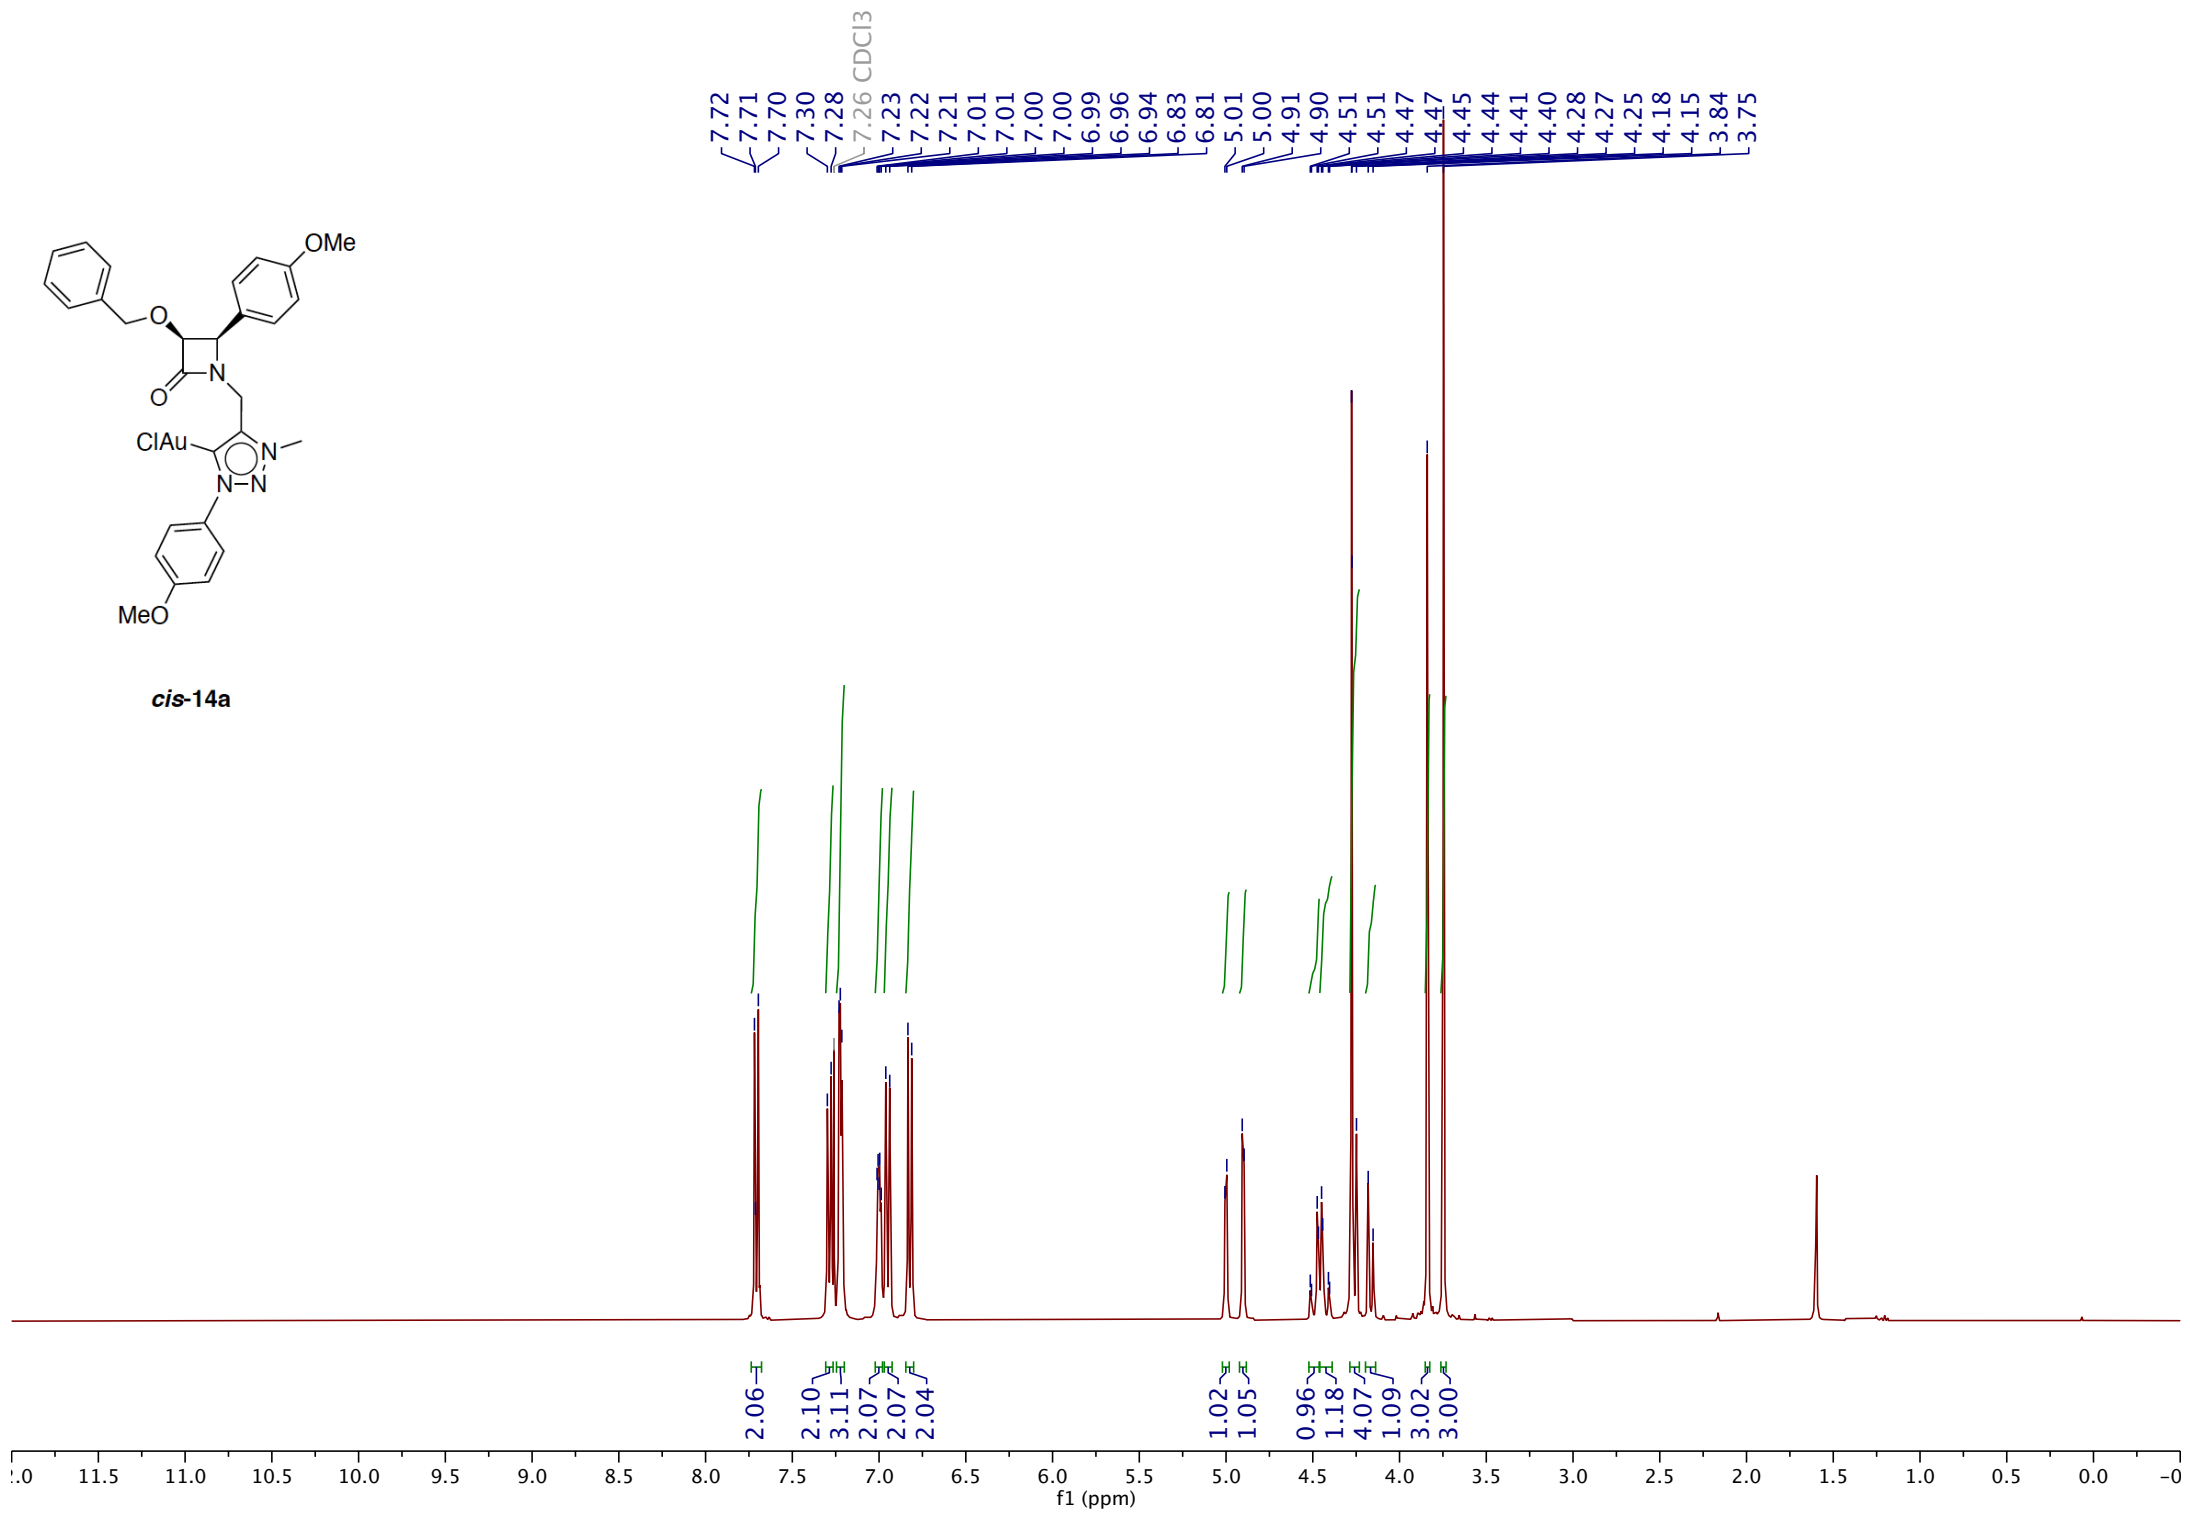

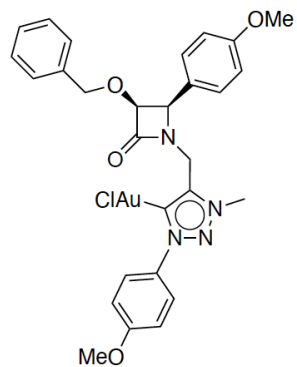*cis*-14a

— 167.20  
/ 161.07  
/ 160.18  
/ 159.02

/ 141.57  
/ 136.14  
/ 131.68  
/ 130.77  
/ 128.45  
/ 128.44  
/ 128.22  
/ 125.31  
/ 124.81

< 114.56  
< 114.10

— 83.86

77.16 CDCl<sub>3</sub>

— 72.66

— 62.48

< 55.82  
< 55.42

— 37.53  
— 34.55

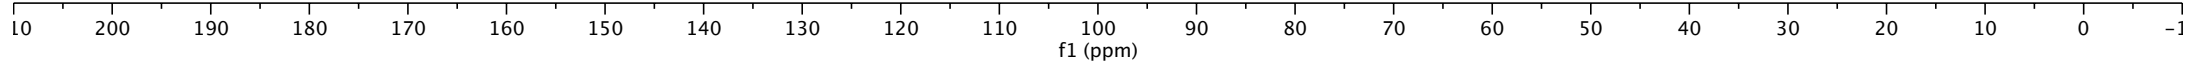

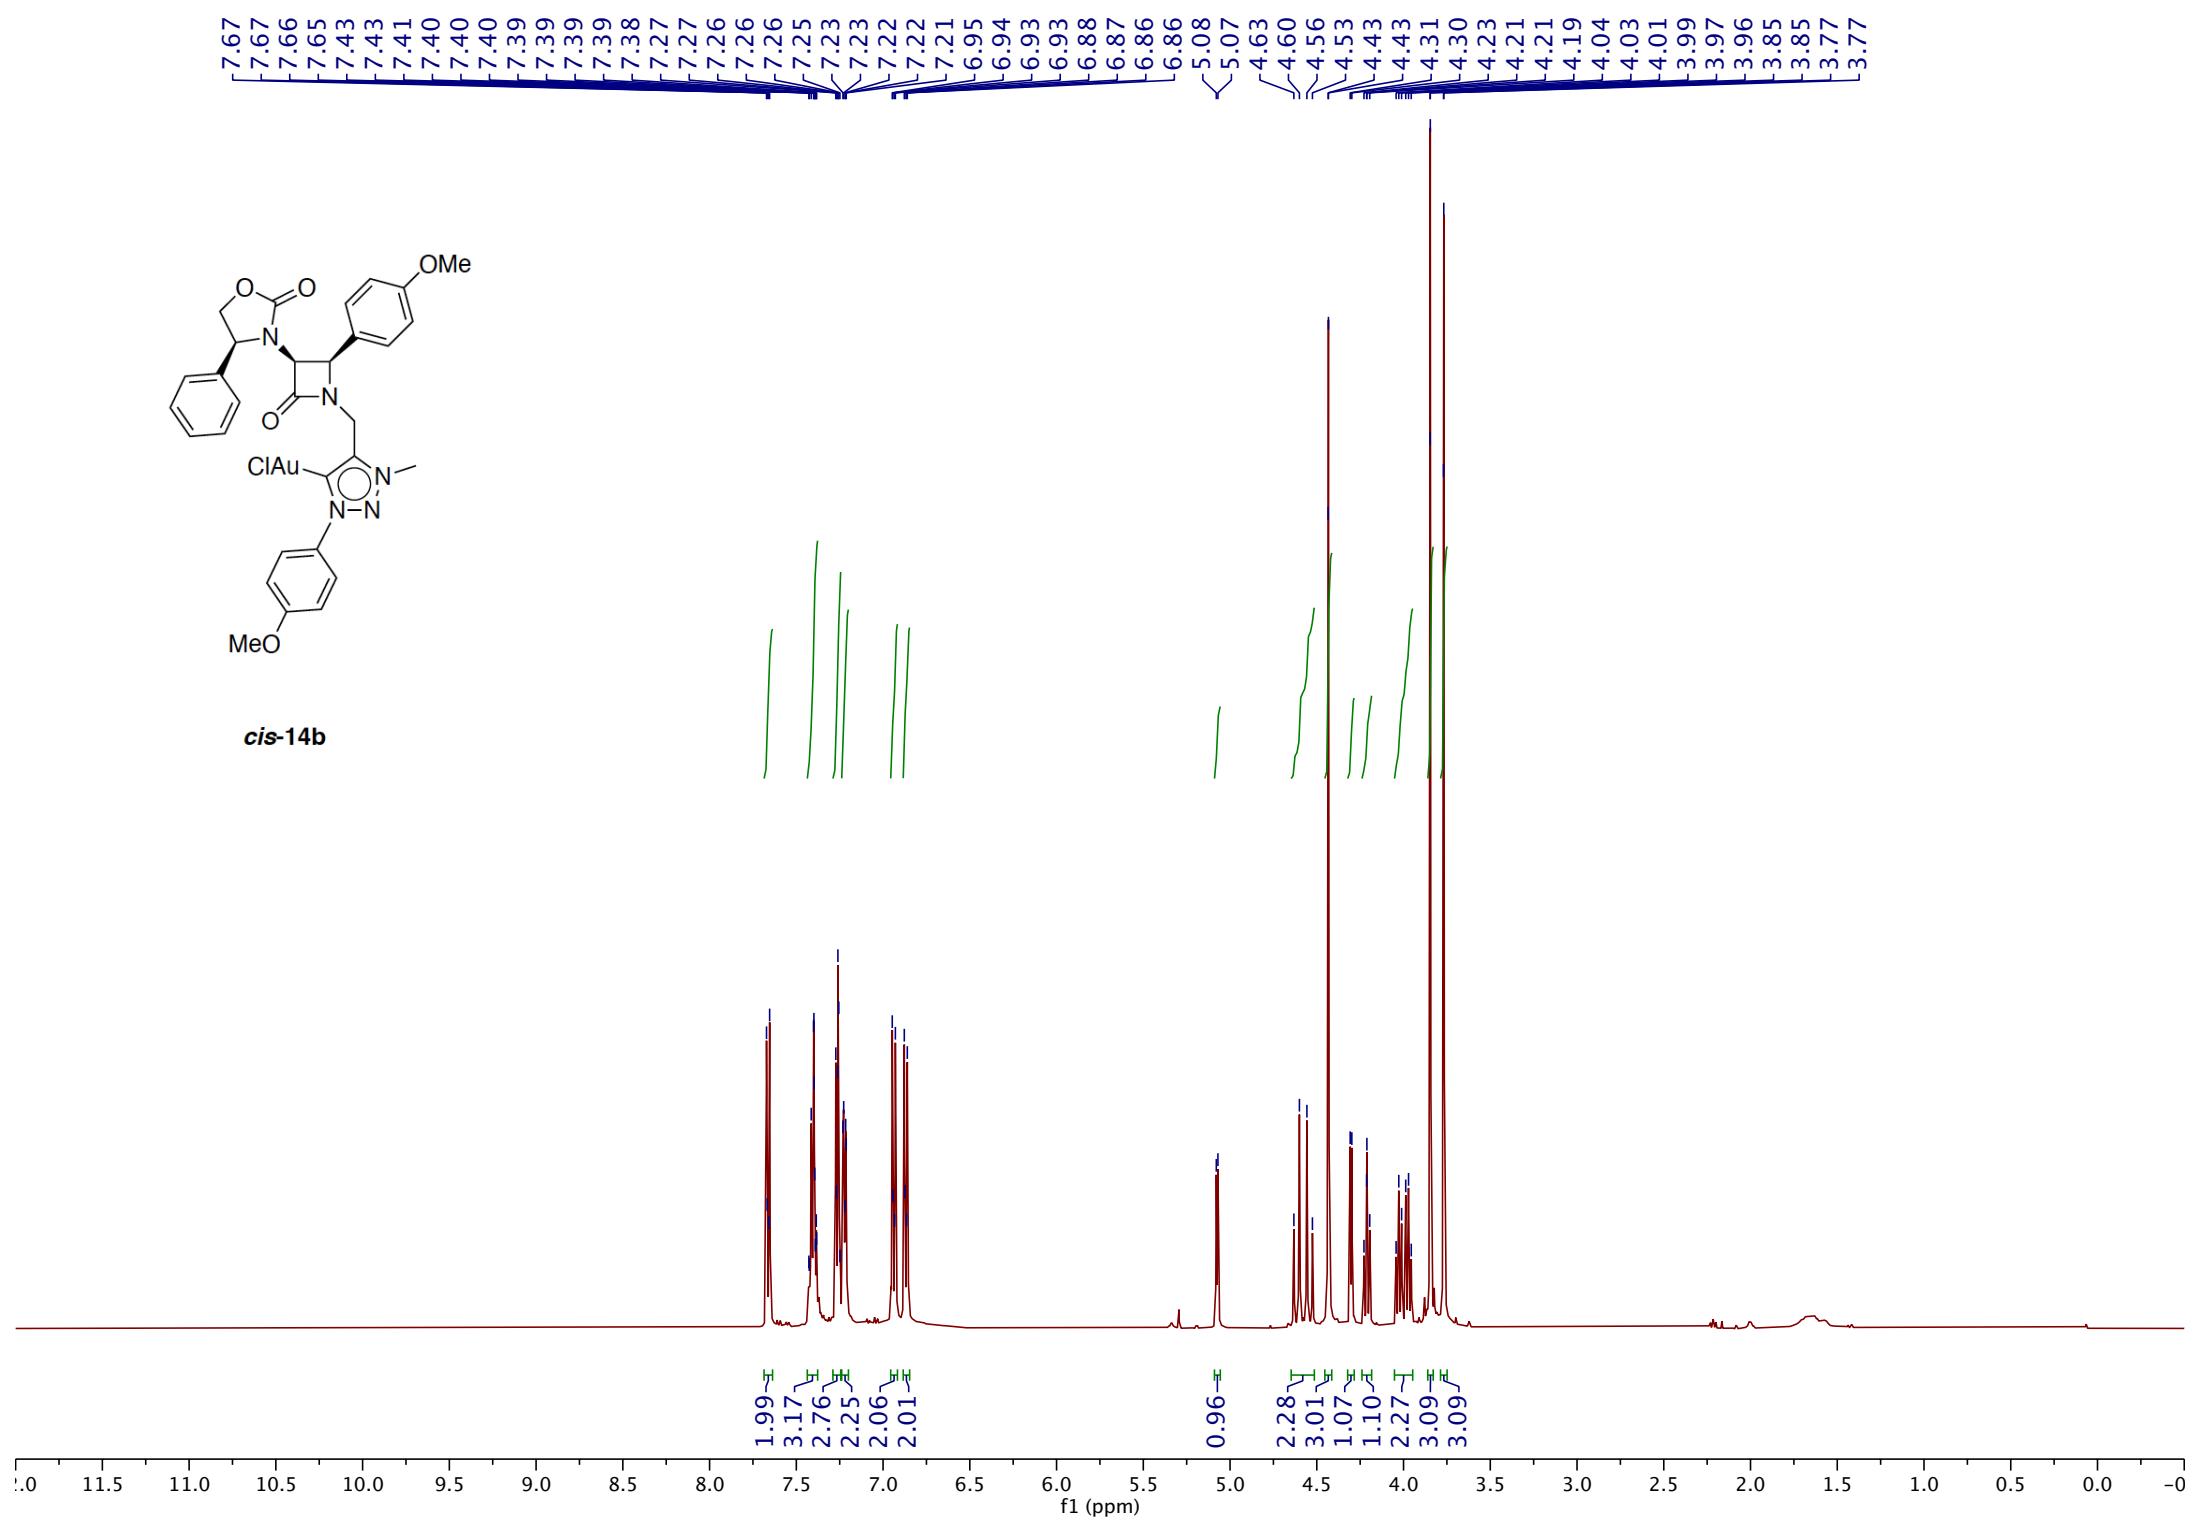



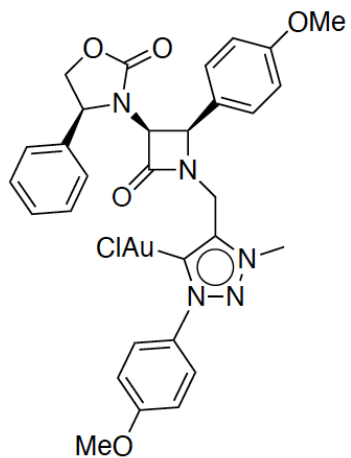

*cis*-14b

163.79  
161.06  
160.32  
158.72  
157.08

141.61  
135.72  
131.65  
129.97  
129.85  
129.79  
127.46  
125.24  
124.12  
114.59  
114.58

77.16 CDCl<sub>3</sub>

70.21  
63.96  
62.99  
60.06  
55.82  
55.43

37.75  
35.58  
29.83

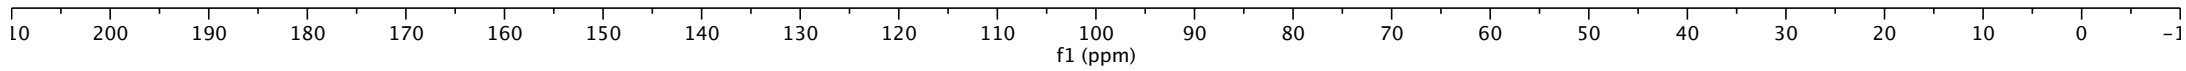

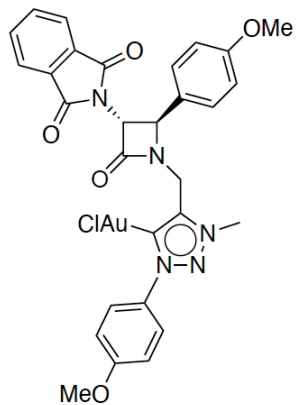

*trans*-14c

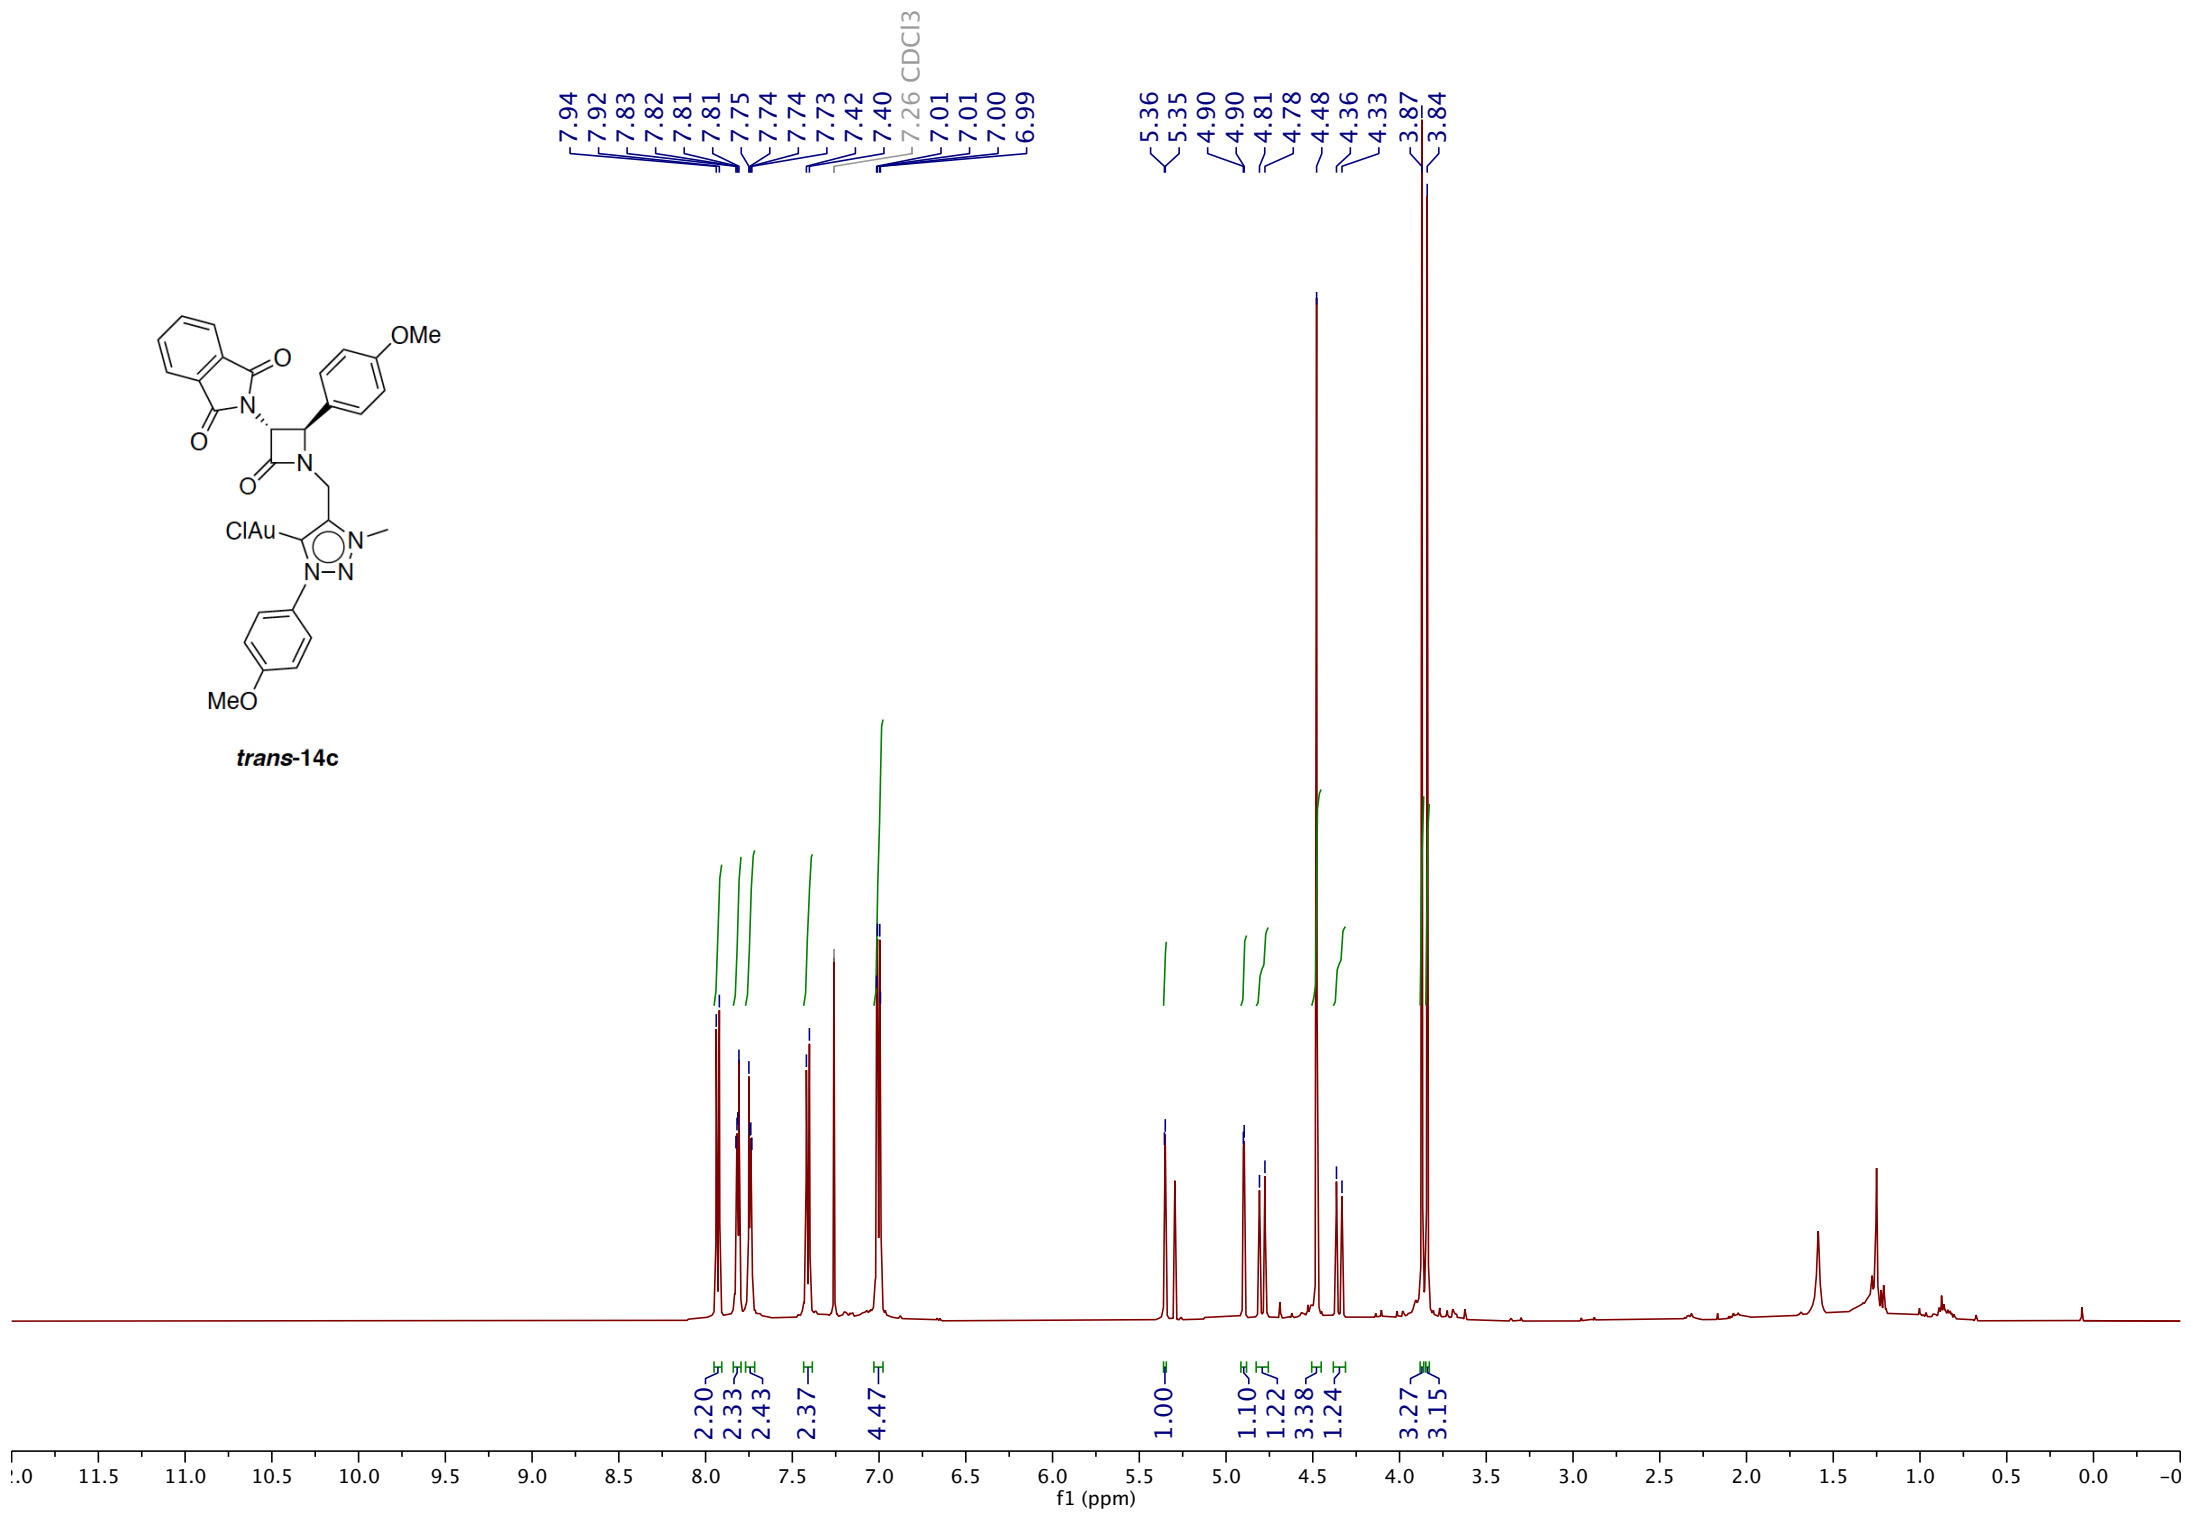

MGM822B-13c  
STANDARD PROTON PARAMETERS

Selective band center: 5.42 (ppm); width: 9.8 (Hz)

166.93  
165.36  
161.10  
160.91  
158.77

140.78  
134.73  
131.98  
131.70  
129.14  
125.43  
125.24  
123.92  
115.35  
114.66

77.16 CDCl<sub>3</sub>

62.10  
60.34  
55.86  
55.64

38.13  
34.65

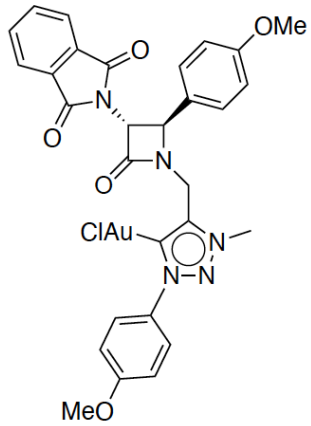

*trans*-14c

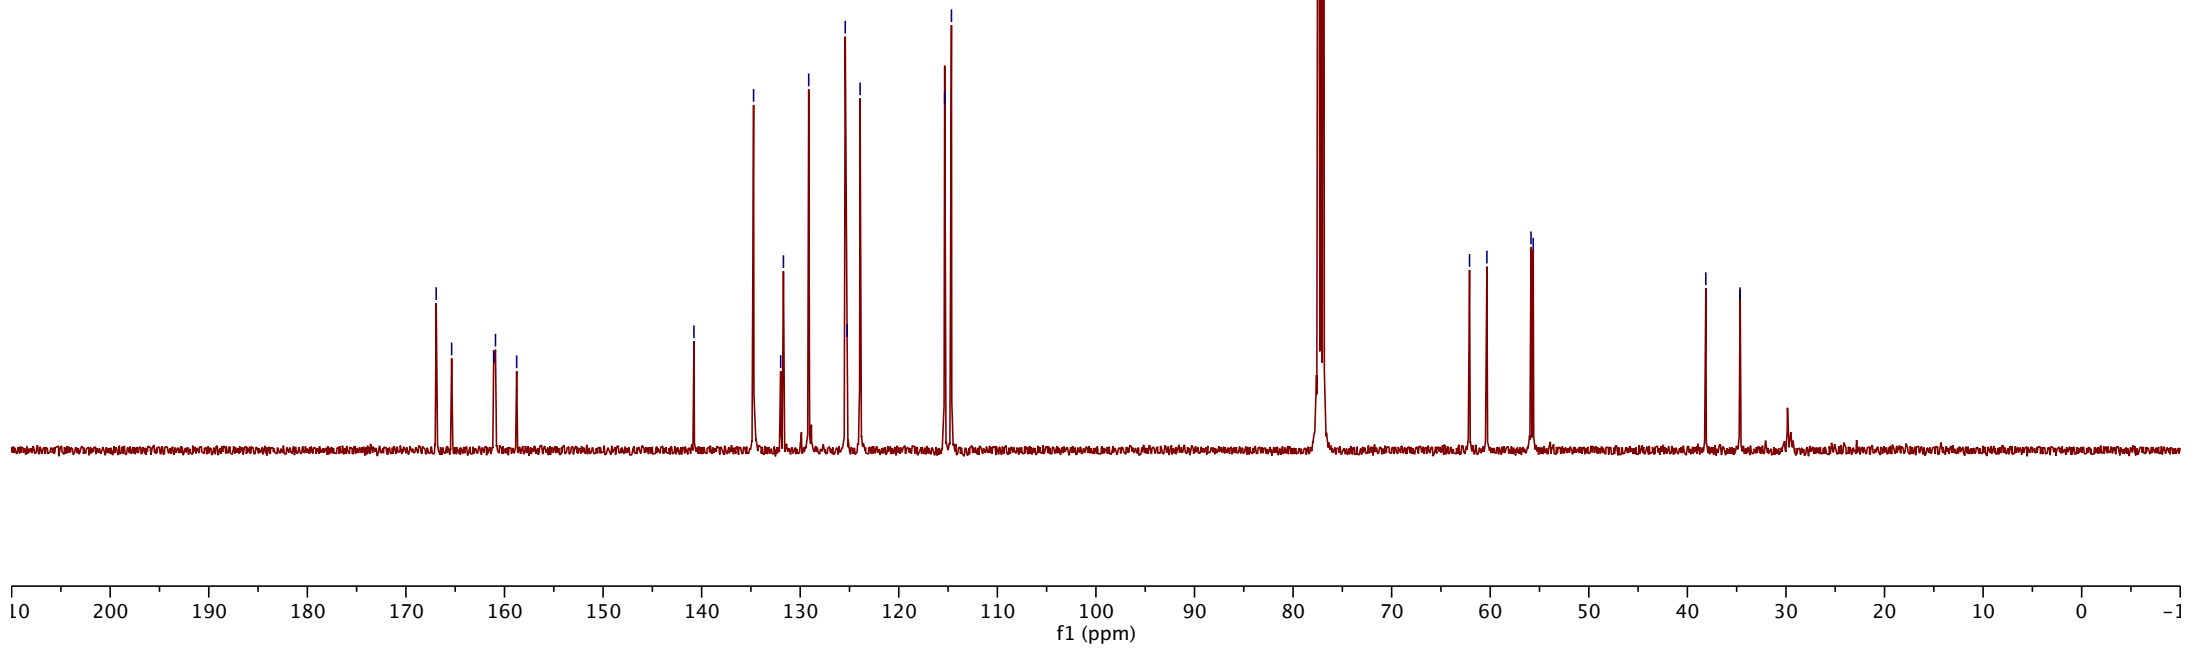

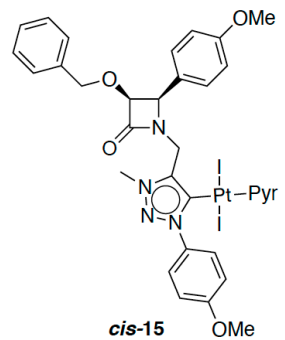

8.49  
8.49  
8.48  
8.47  
8.47  
8.21  
8.20  
8.19  
7.67  
7.66  
7.66  
7.65  
7.64  
7.64  
7.64  
7.63  
7.62  
7.62  
7.51  
7.50  
7.49  
7.26 CDCl<sub>3</sub>  
7.21  
7.20  
7.07  
7.04  
6.97  
6.97  
6.96  
6.96  
6.95  
6.94  
5.57  
5.57  
5.56  
4.94  
4.90  
4.89  
4.89  
4.88  
4.84  
4.80  
4.20  
4.19  
4.18  
4.16  
3.89  
3.89  
3.89

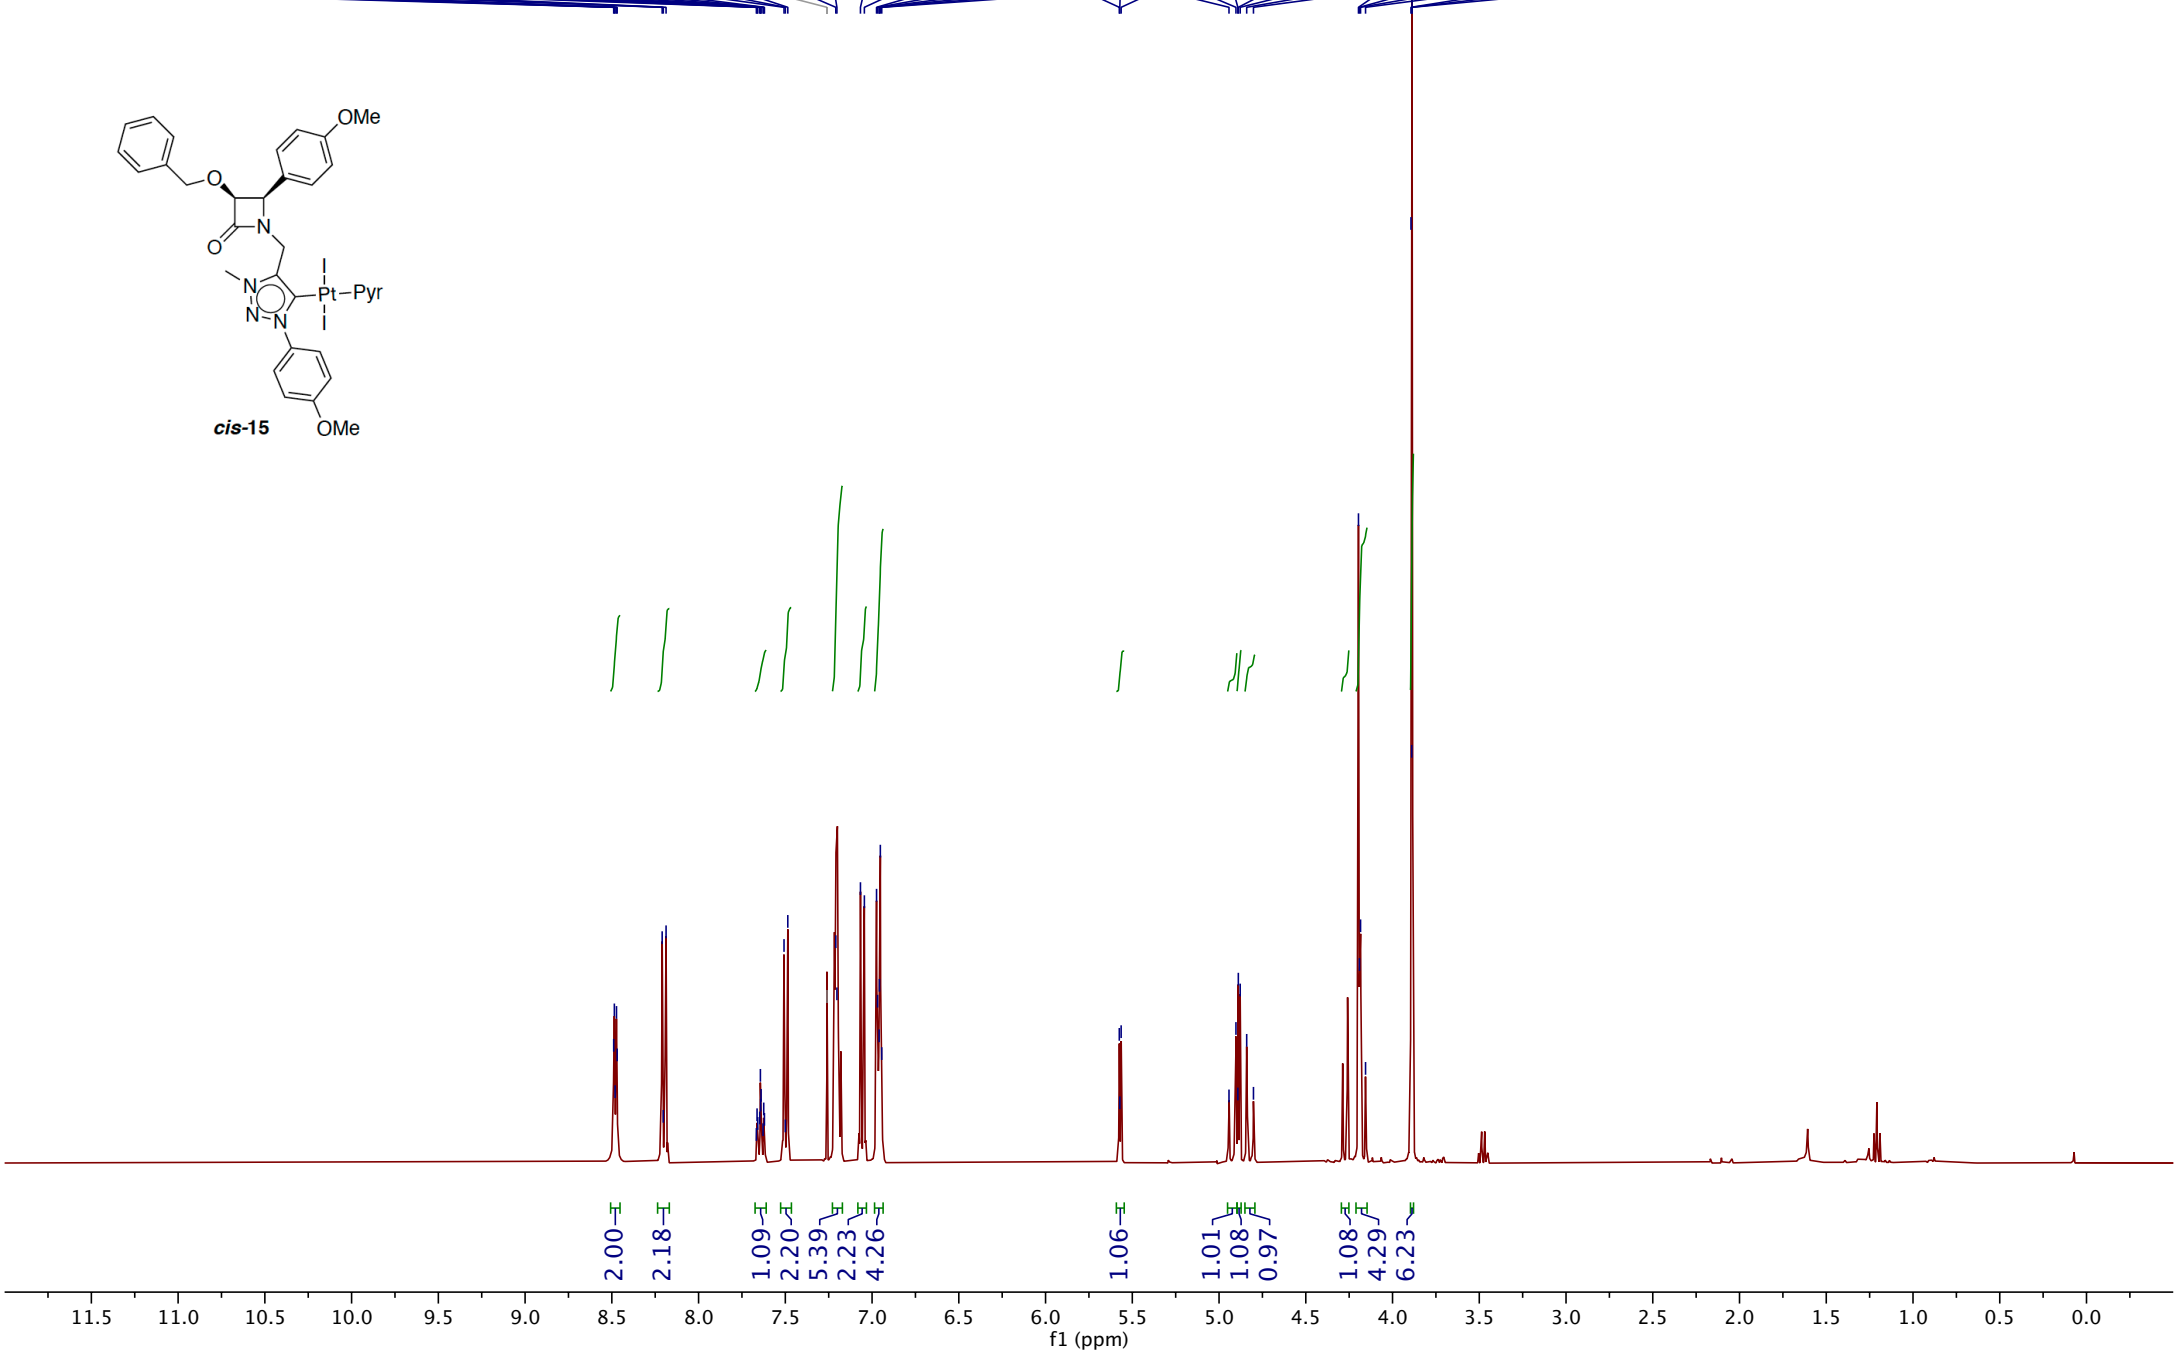

MGM877B  
single pulse decoupled gated NOE

— 167.52  
— 160.55  
— 159.94  
— 153.77  
— 140.26  
— 137.30  
— 136.51  
— 132.66  
— 130.71  
— 128.34  
— 128.29  
— 128.00  
— 126.70  
— 125.47  
— 124.82  
— 114.12  
— 113.82

— 84.20

— 72.37

— 61.70

— 55.67

— 55.52

— 37.50

— 33.91

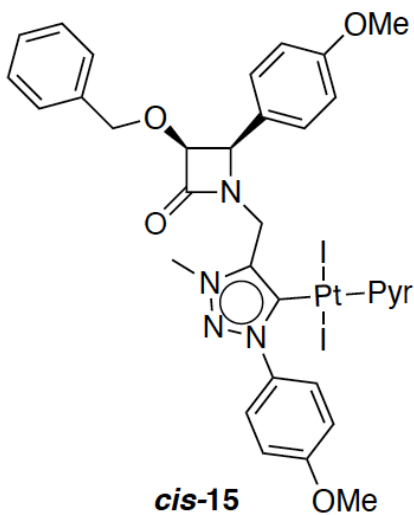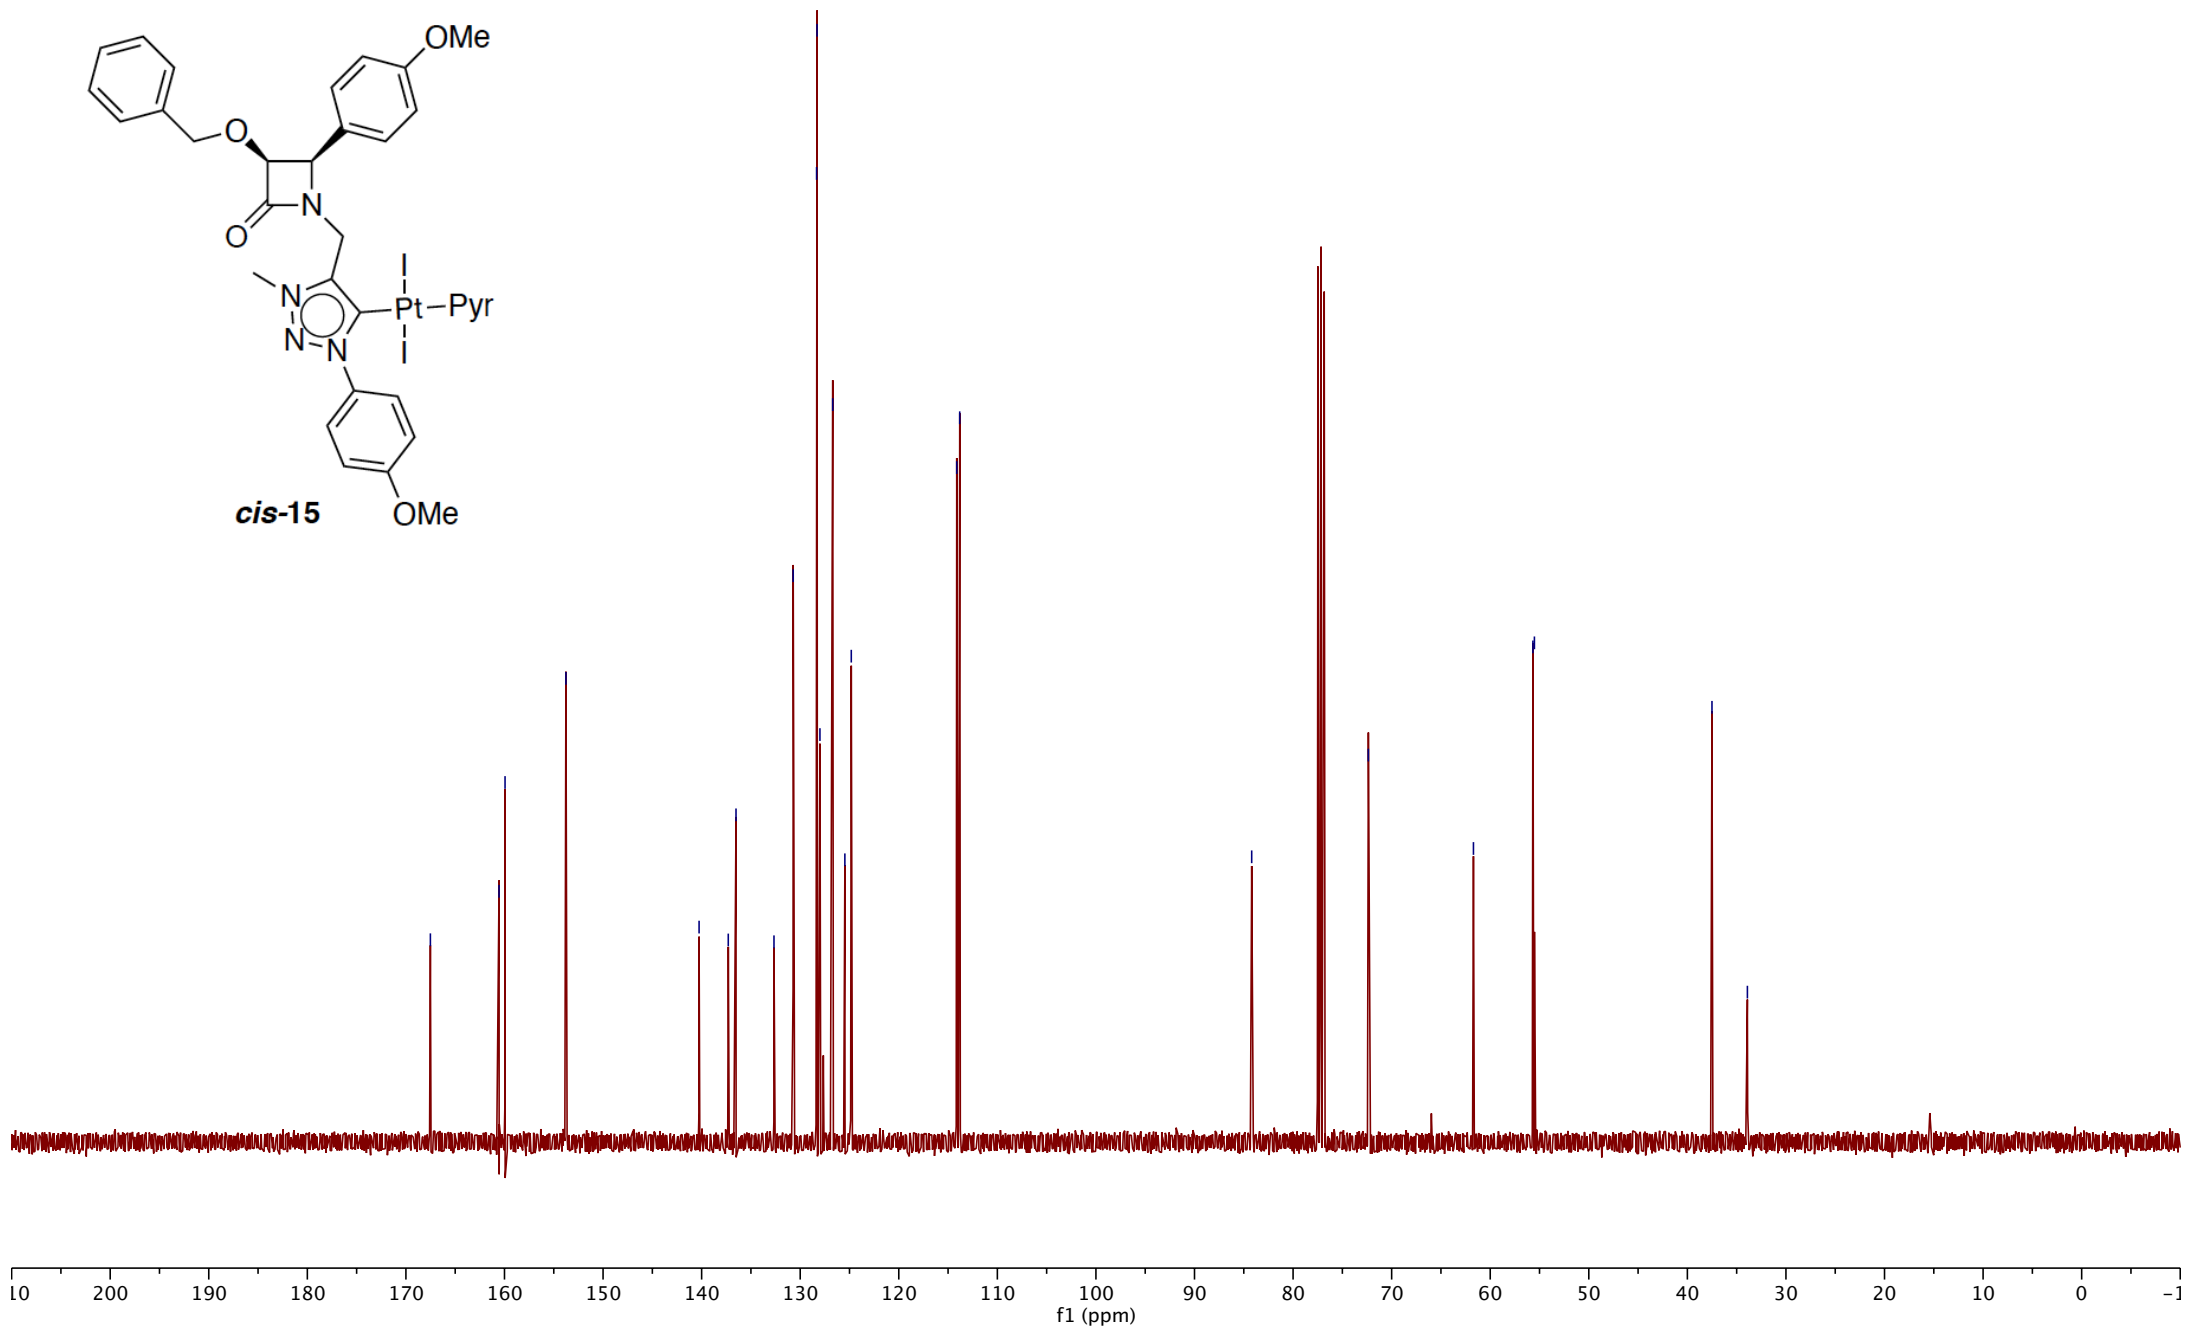

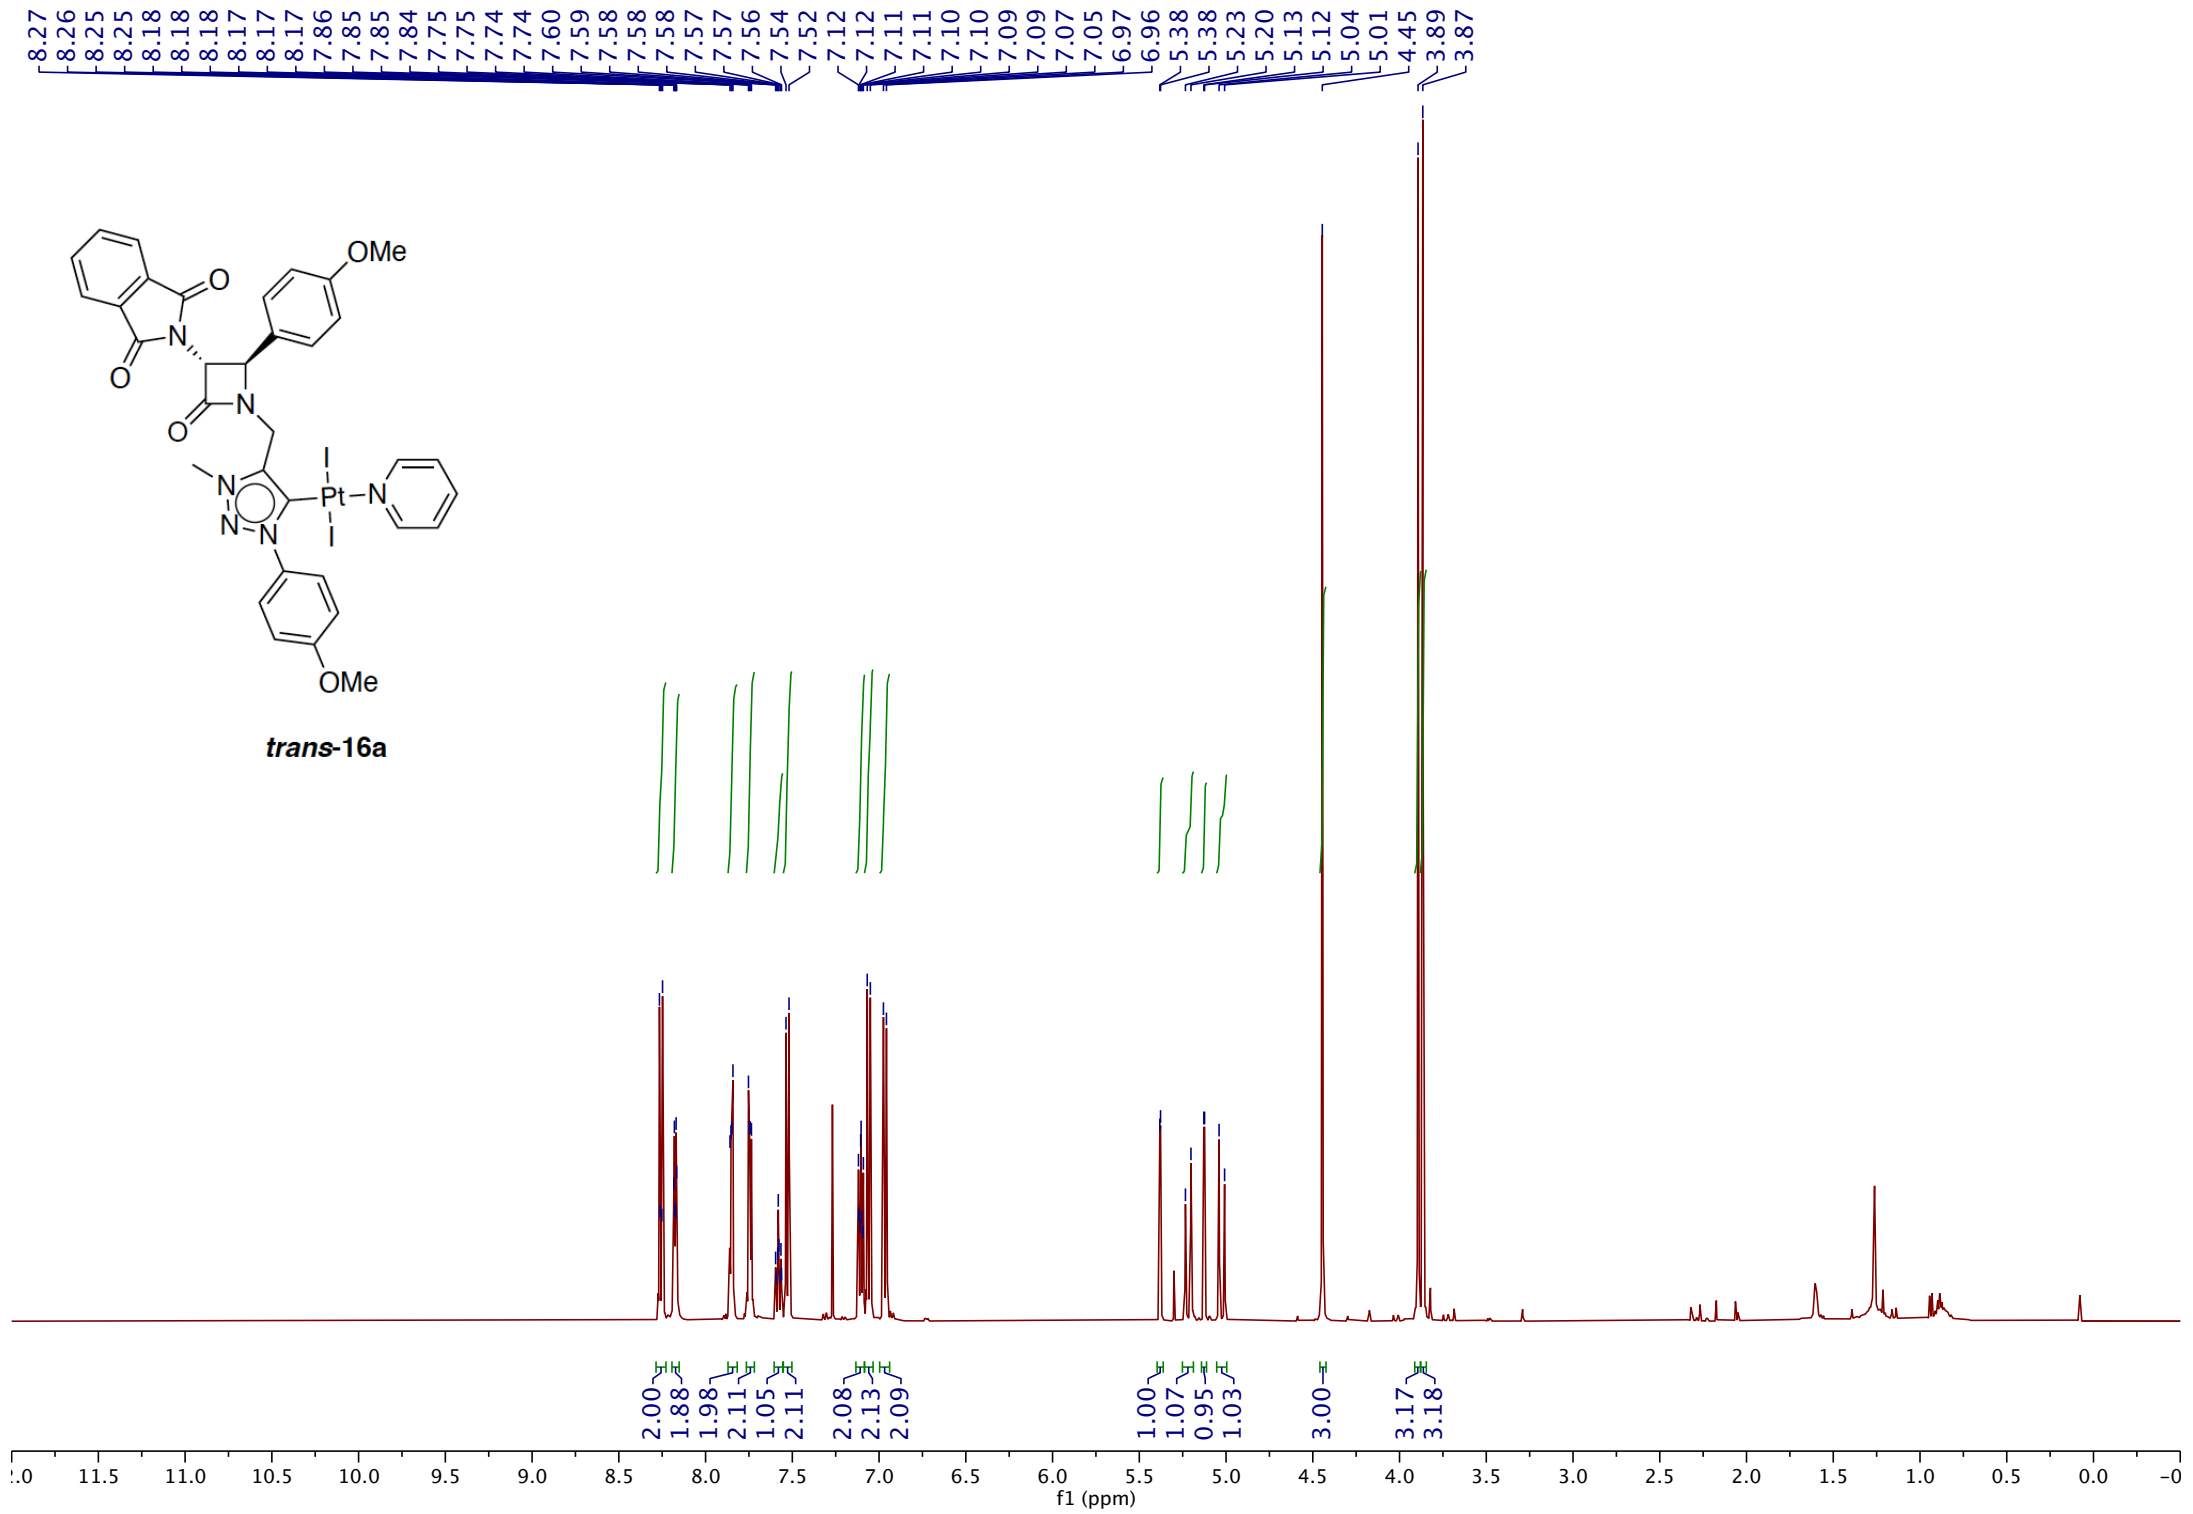

MGM837CB-13c  
STANDARD PROTON PARAMETERS

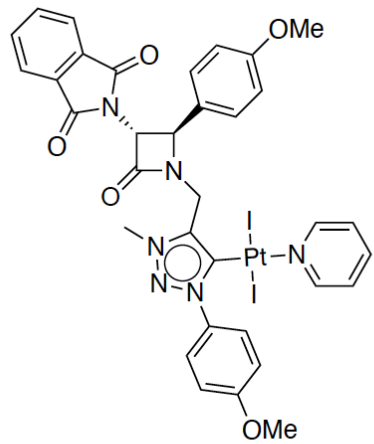

166.84  
165.53  
160.44  
159.94  
153.59  
139.59  
137.09  
134.56  
132.95  
131.82  
129.01  
127.65  
127.29  
126.80  
124.59  
123.92  
114.67  
113.71

77.16 CDCl<sub>3</sub>

63.65  
60.88  
55.65  
55.51

38.07  
35.09

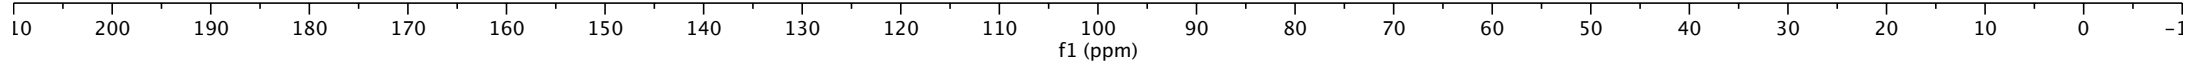

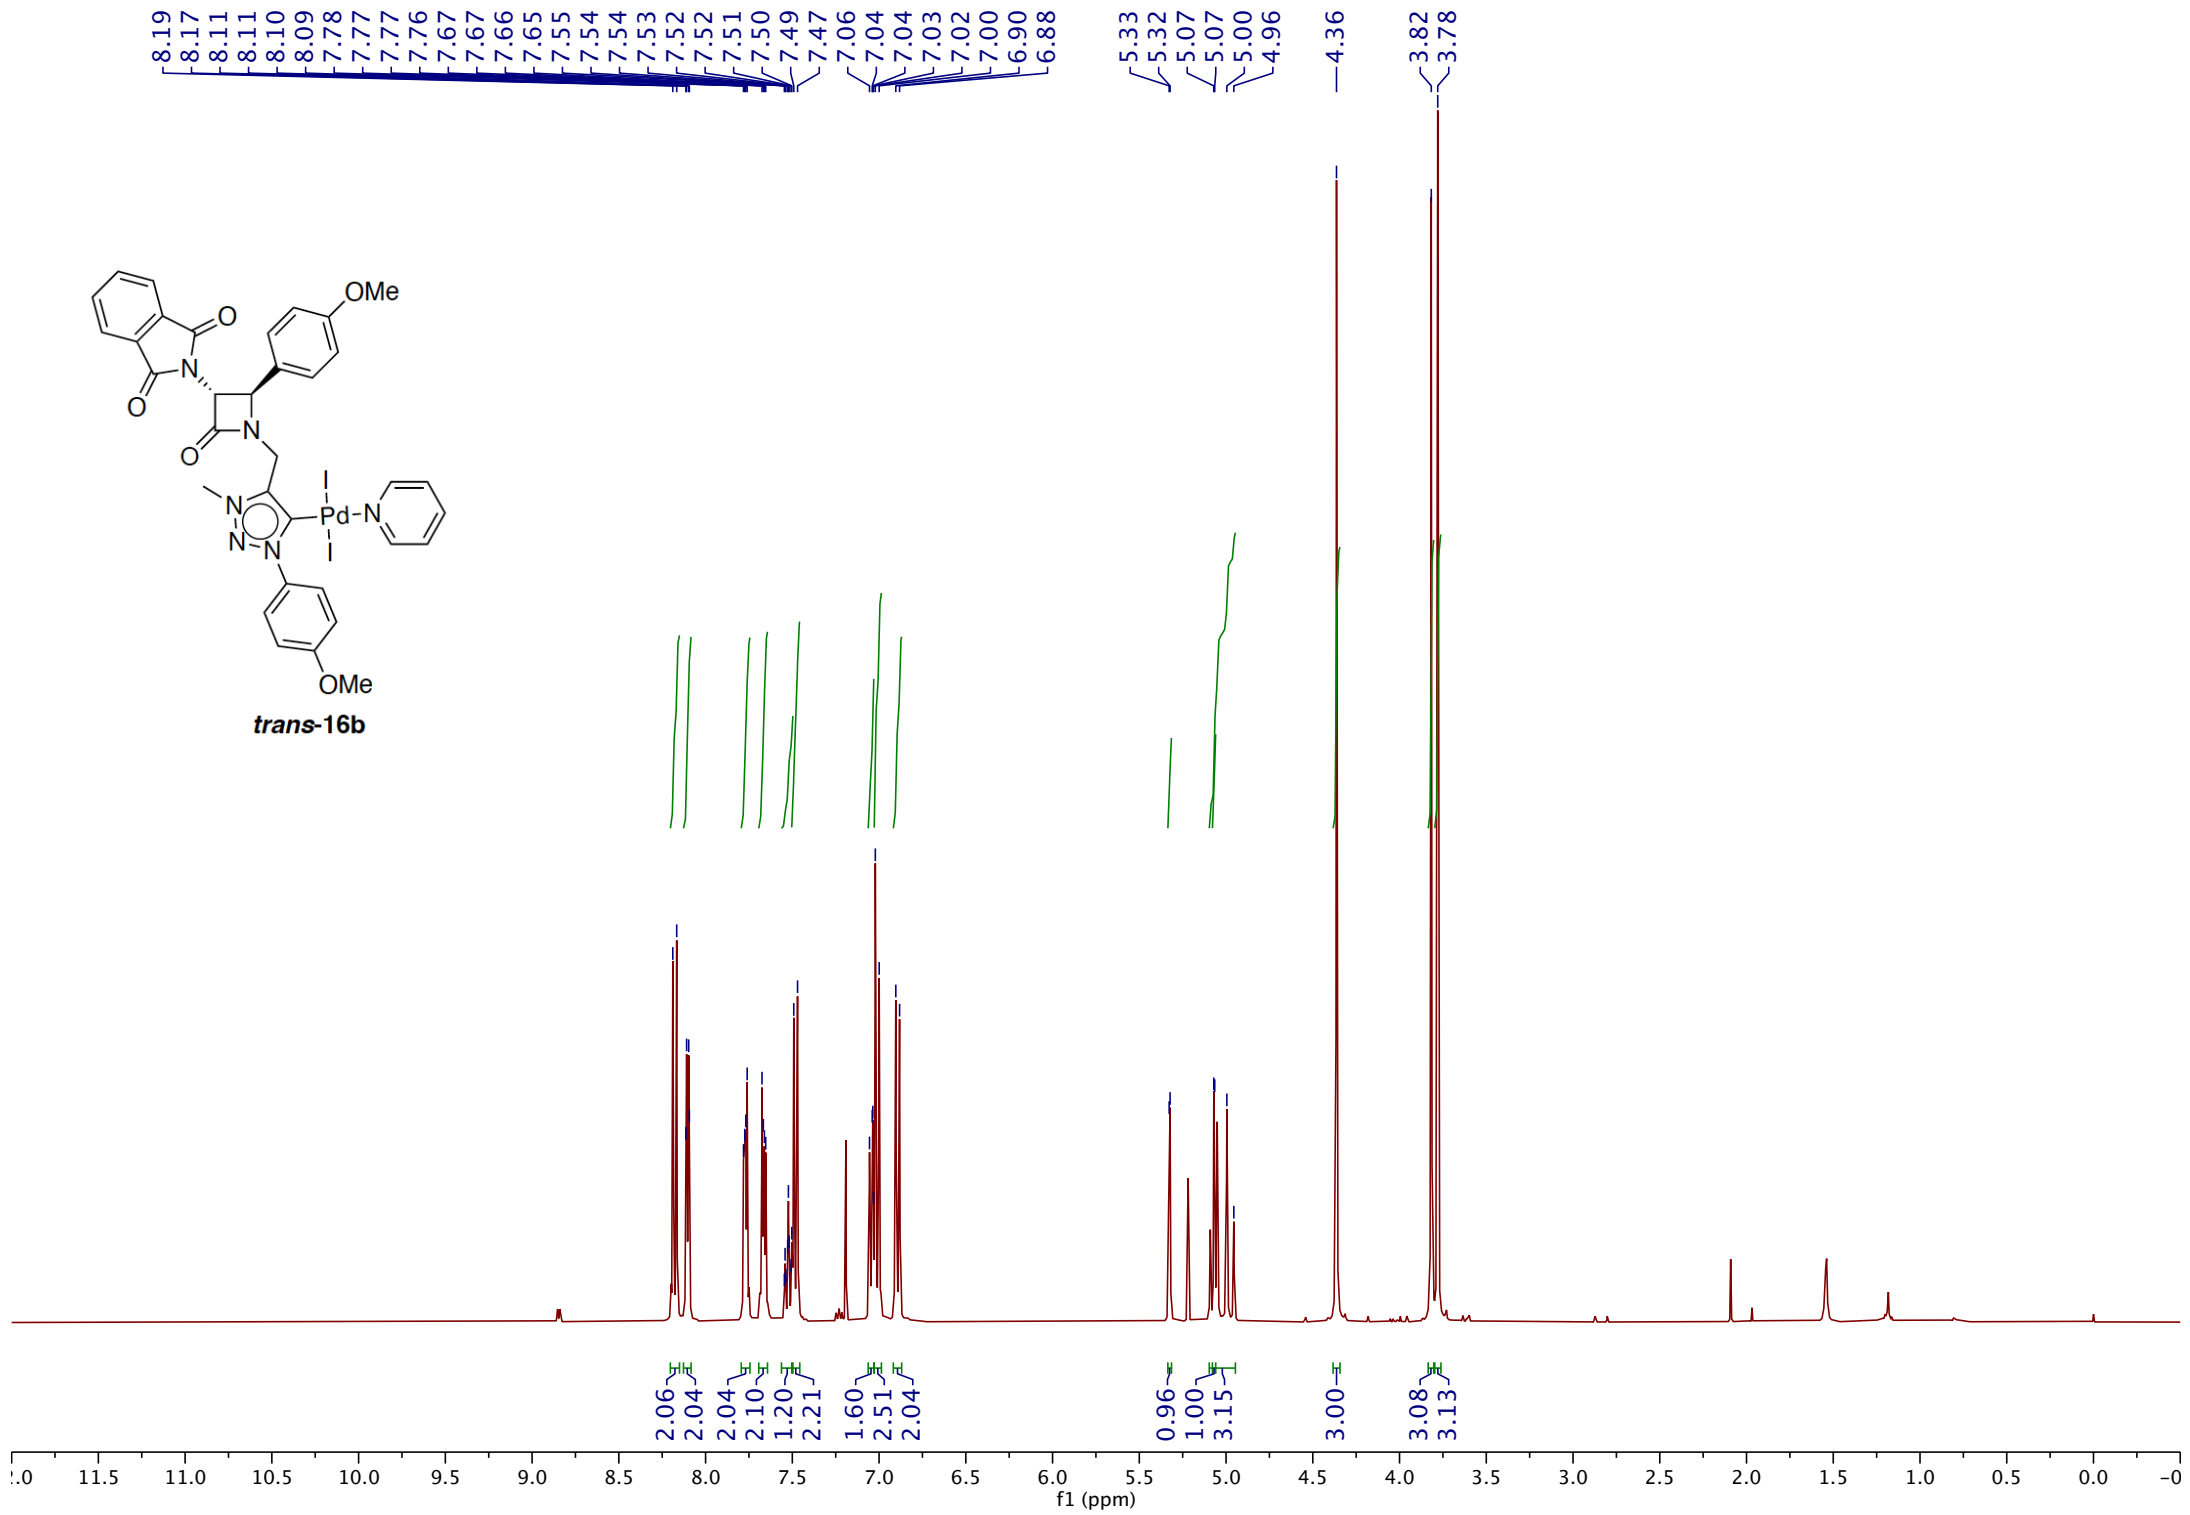



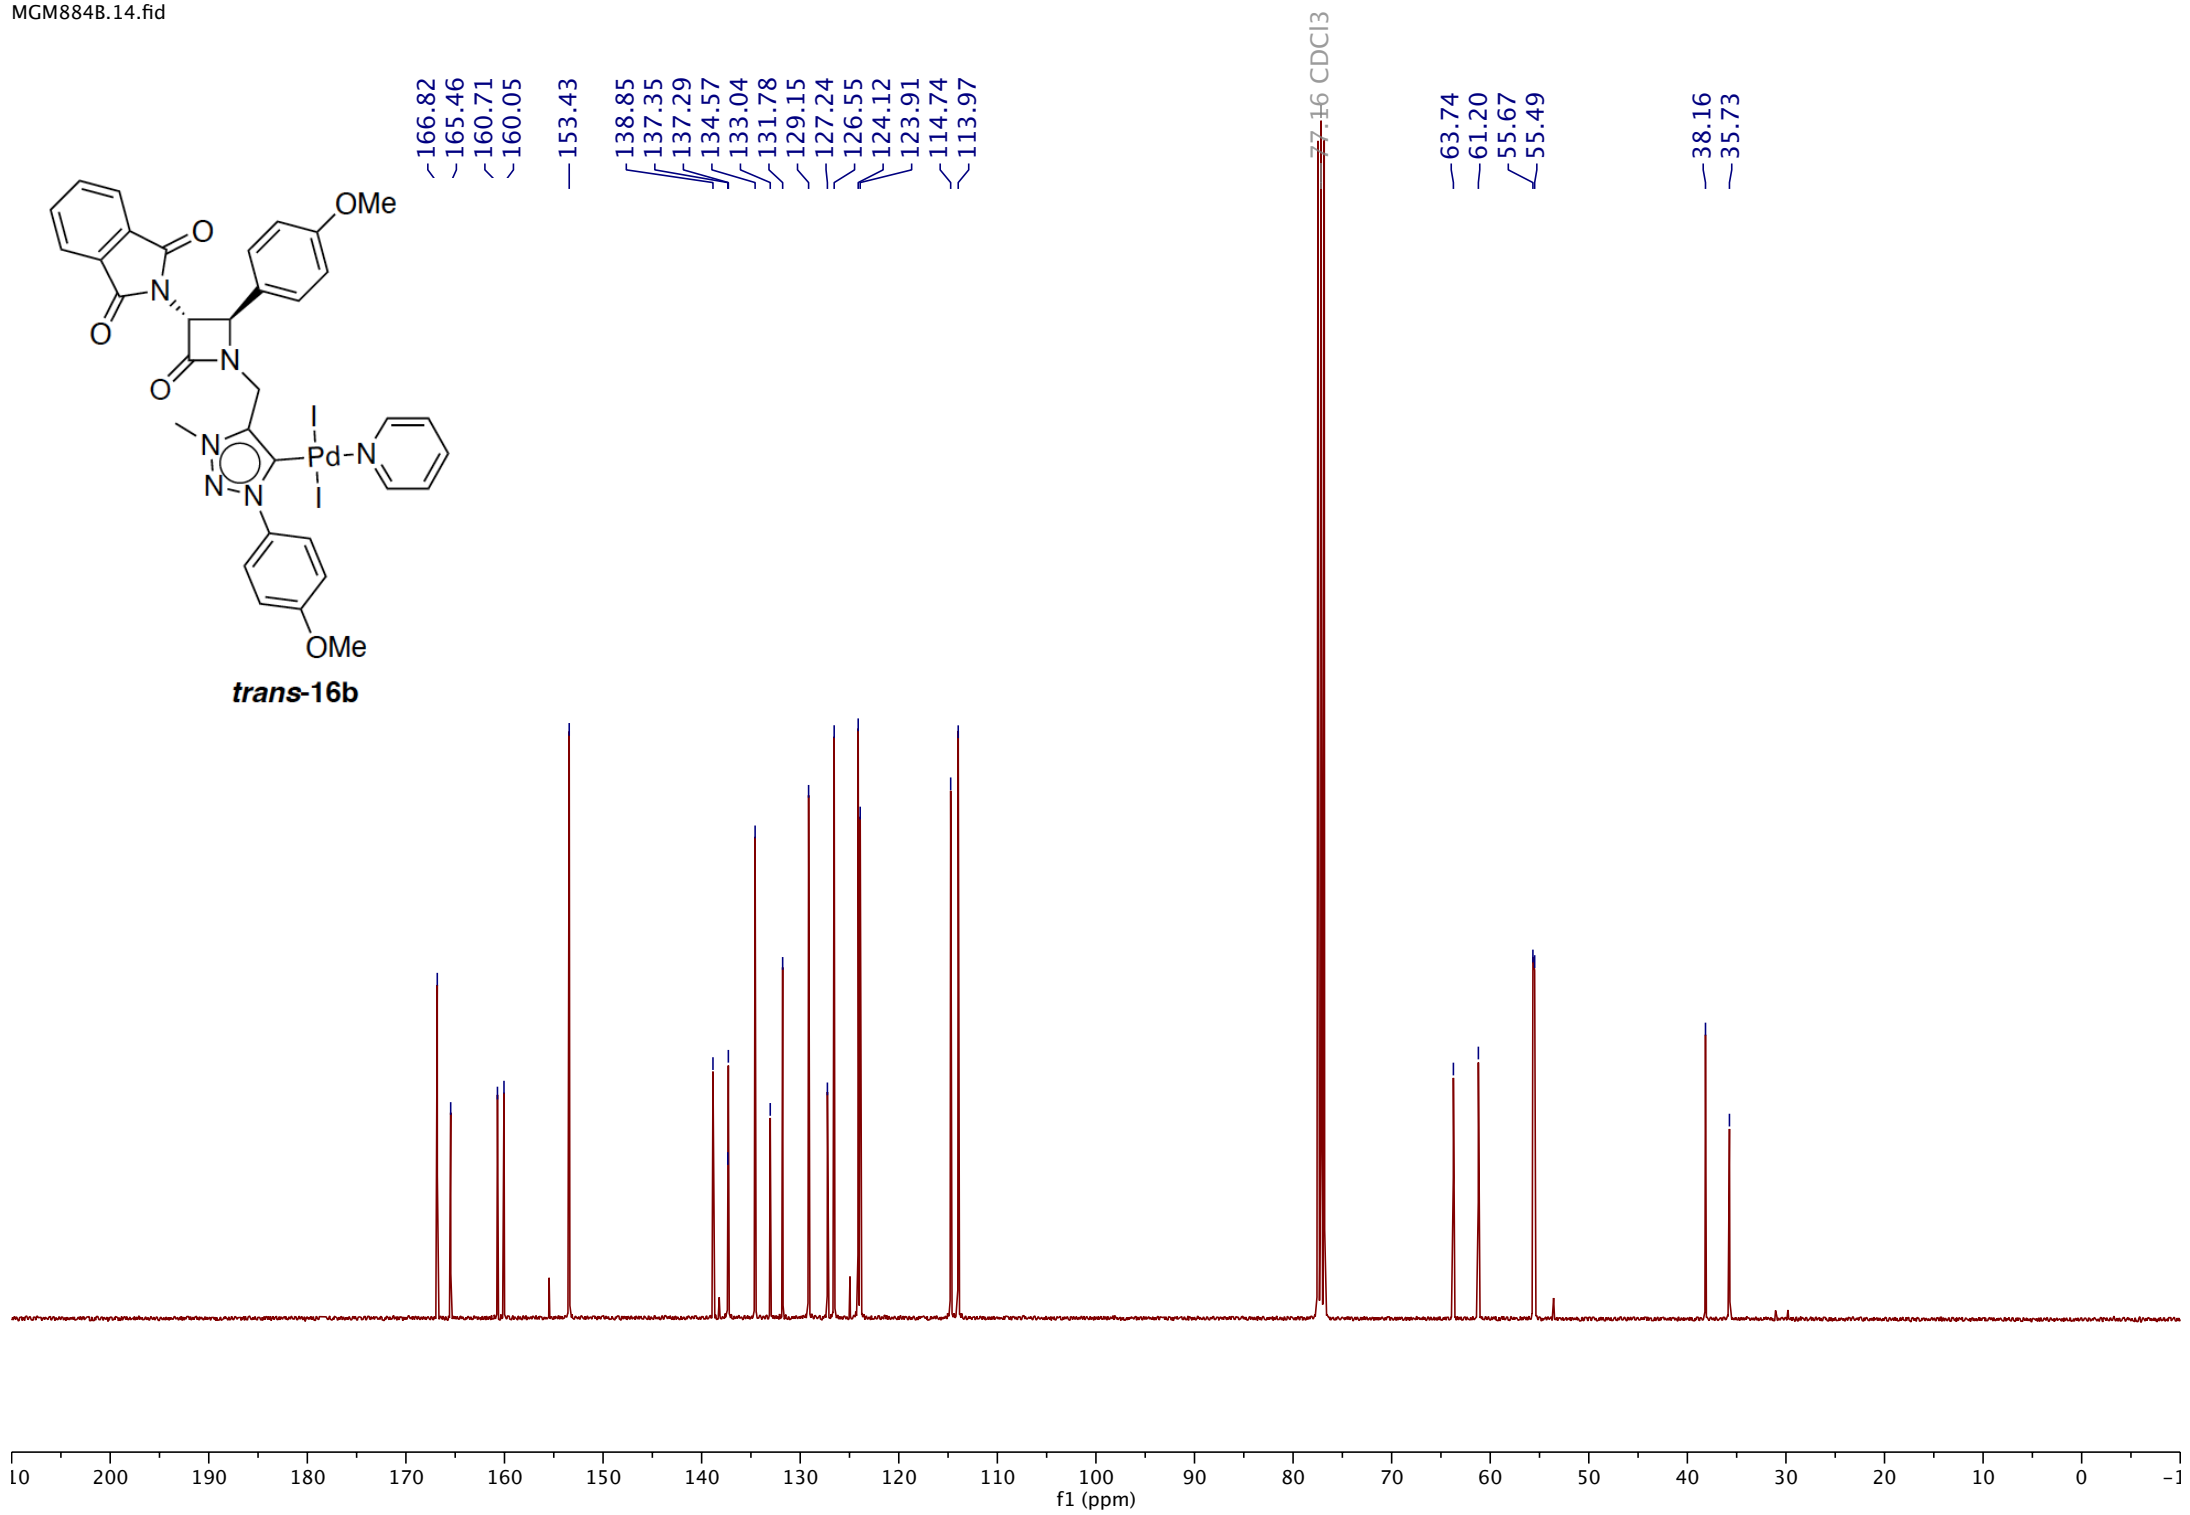

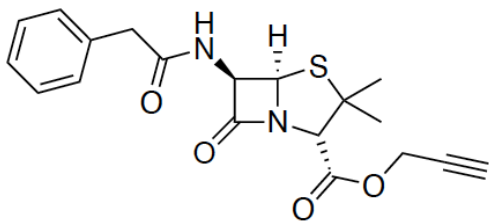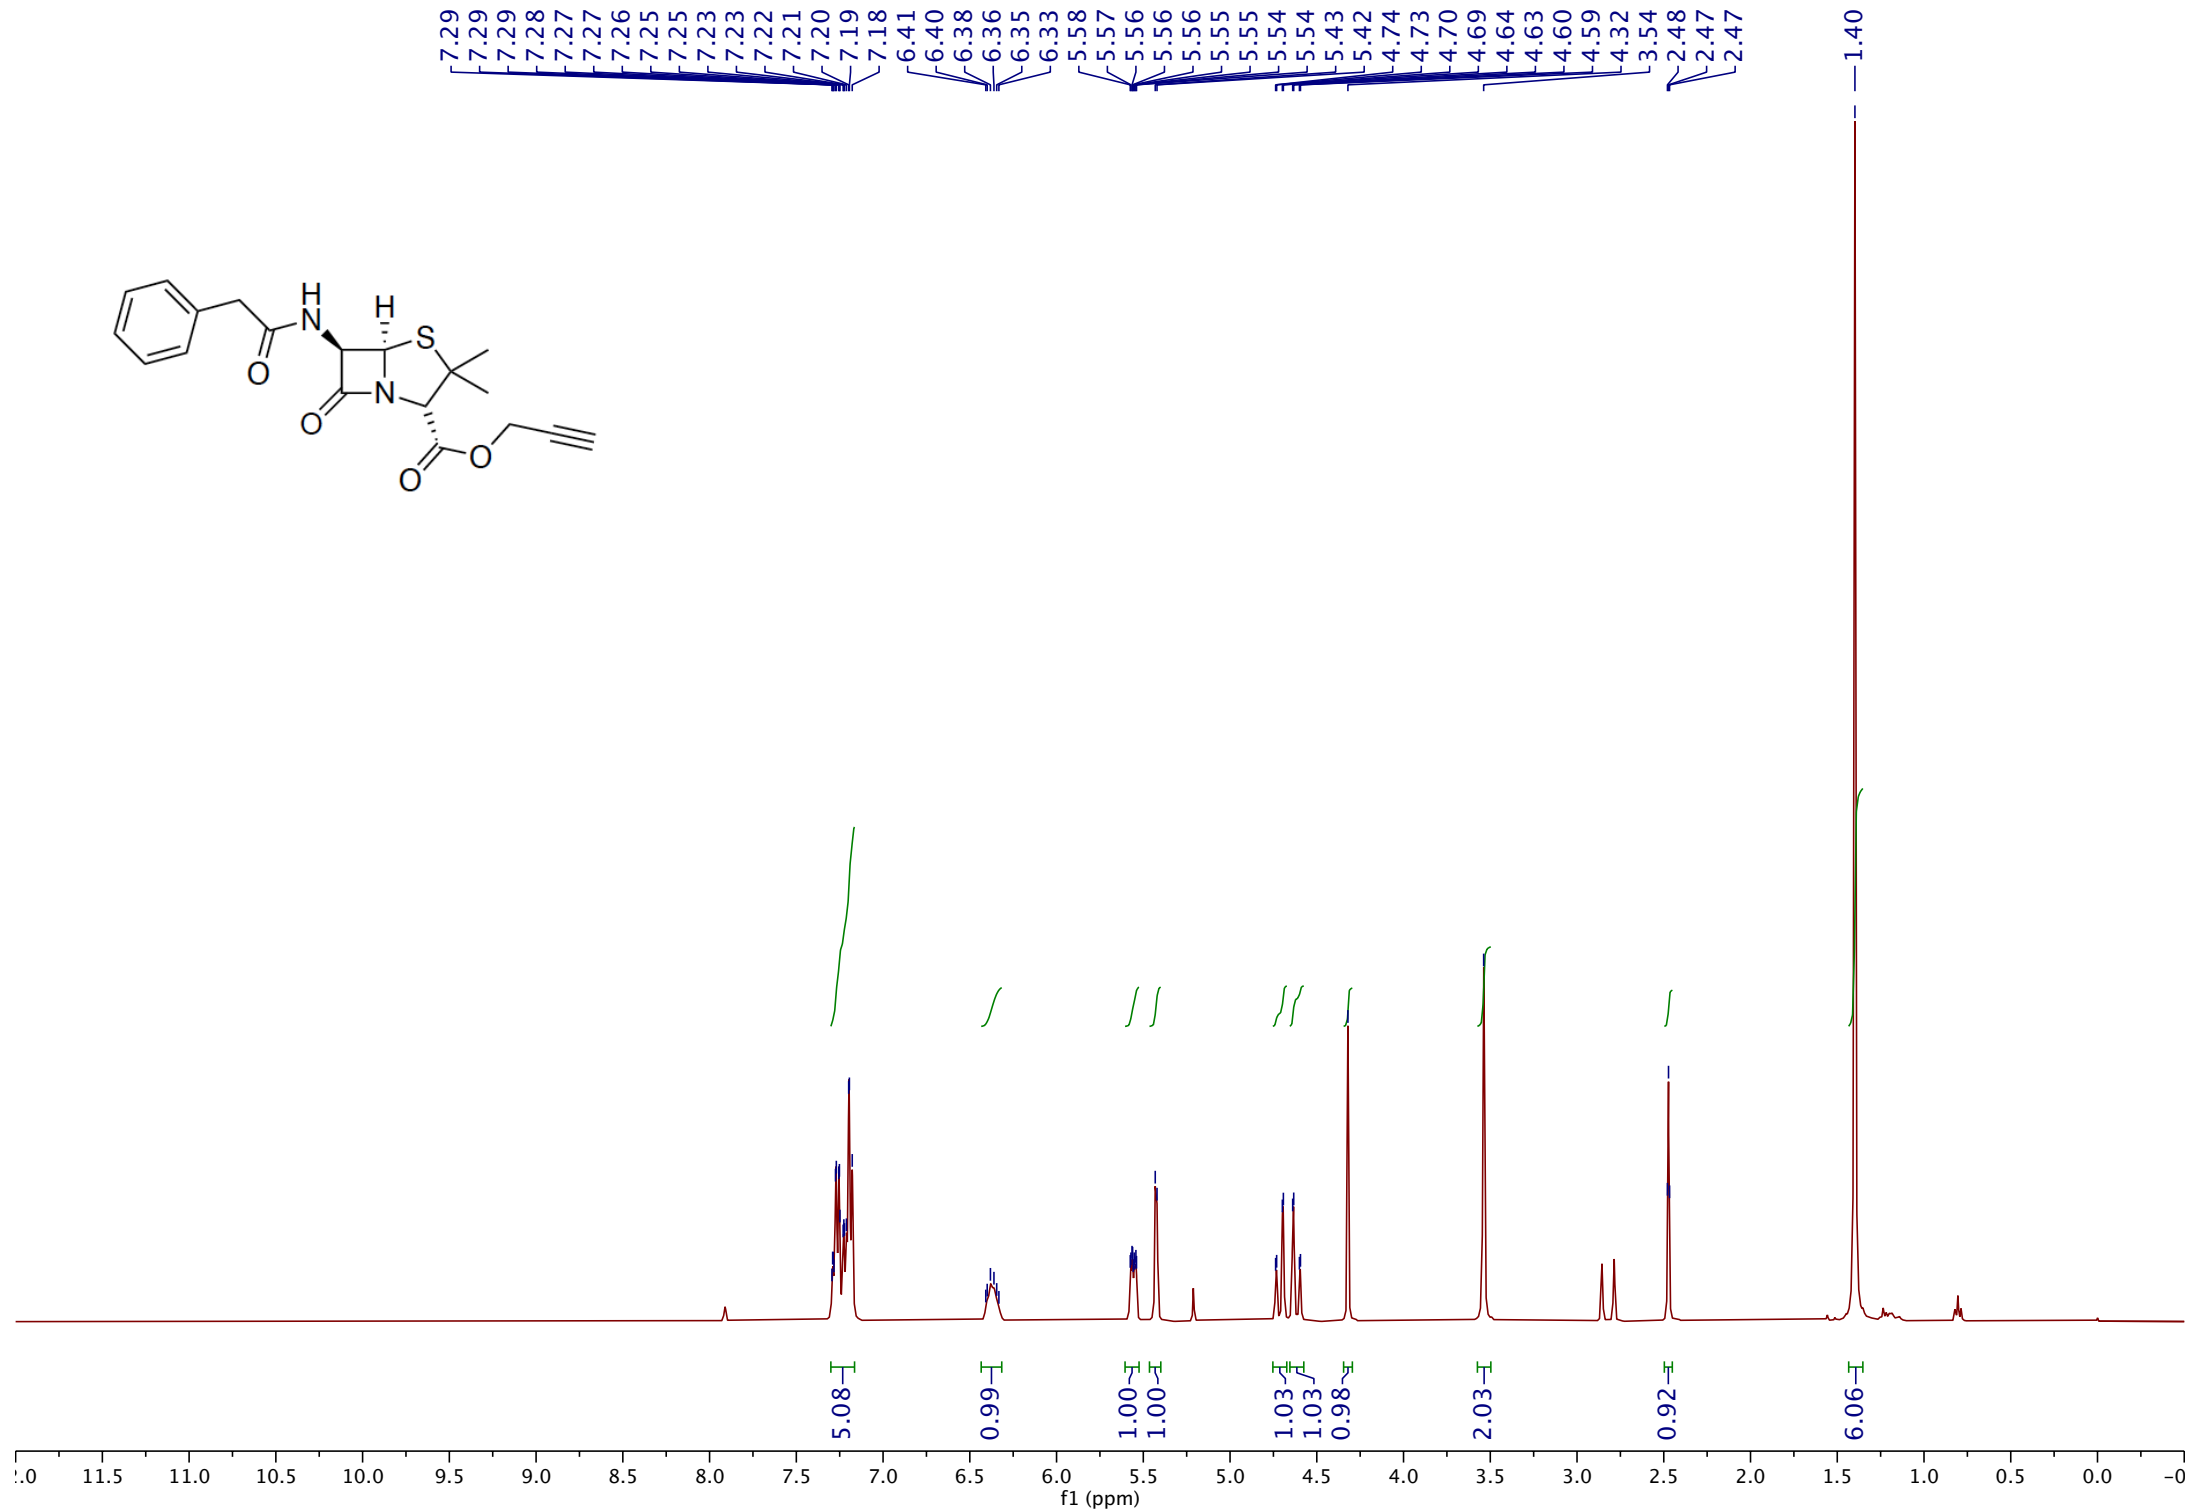

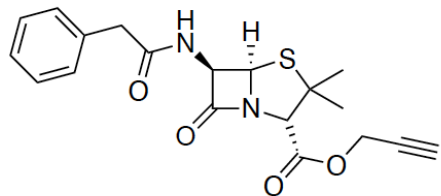

~173.45  
~170.41  
~166.80

~133.97  
~133.95  
~129.42  
~128.97  
~127.46

~77.16 CDCl<sub>3</sub>  
~75.98

~69.98  
~68.00  
~64.65

~58.79  
~52.74

~43.12

~31.64  
~26.72

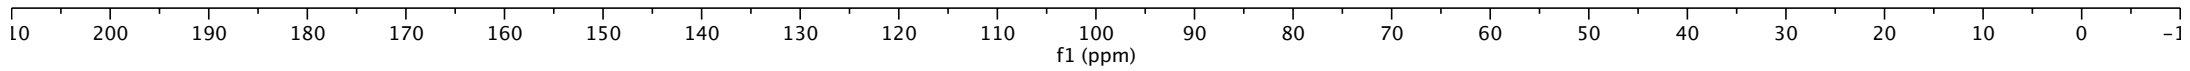

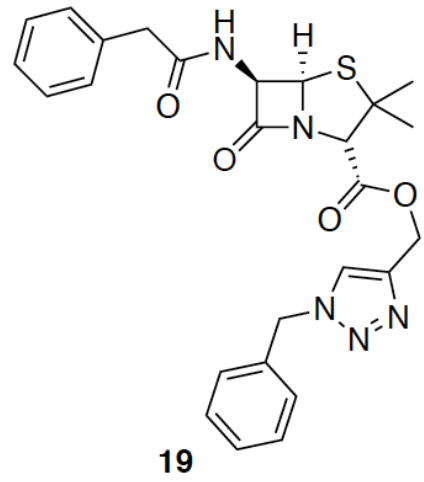

7.46  
7.31  
7.31  
7.30  
7.29  
7.29  
7.28  
7.28  
7.27  
7.27  
7.27  
7.26  
7.25  
7.24  
7.24  
7.23  
7.23  
7.21  
7.20  
7.19  
7.19  
7.18  
7.18  
7.17  
7.17  
7.17  
6.02  
5.57  
5.56  
5.56  
5.55  
5.54  
5.54  
5.53  
5.53  
5.45  
5.44  
5.38  
5.38  
5.37  
5.37  
5.19  
5.18  
4.26  
3.55  
3.55

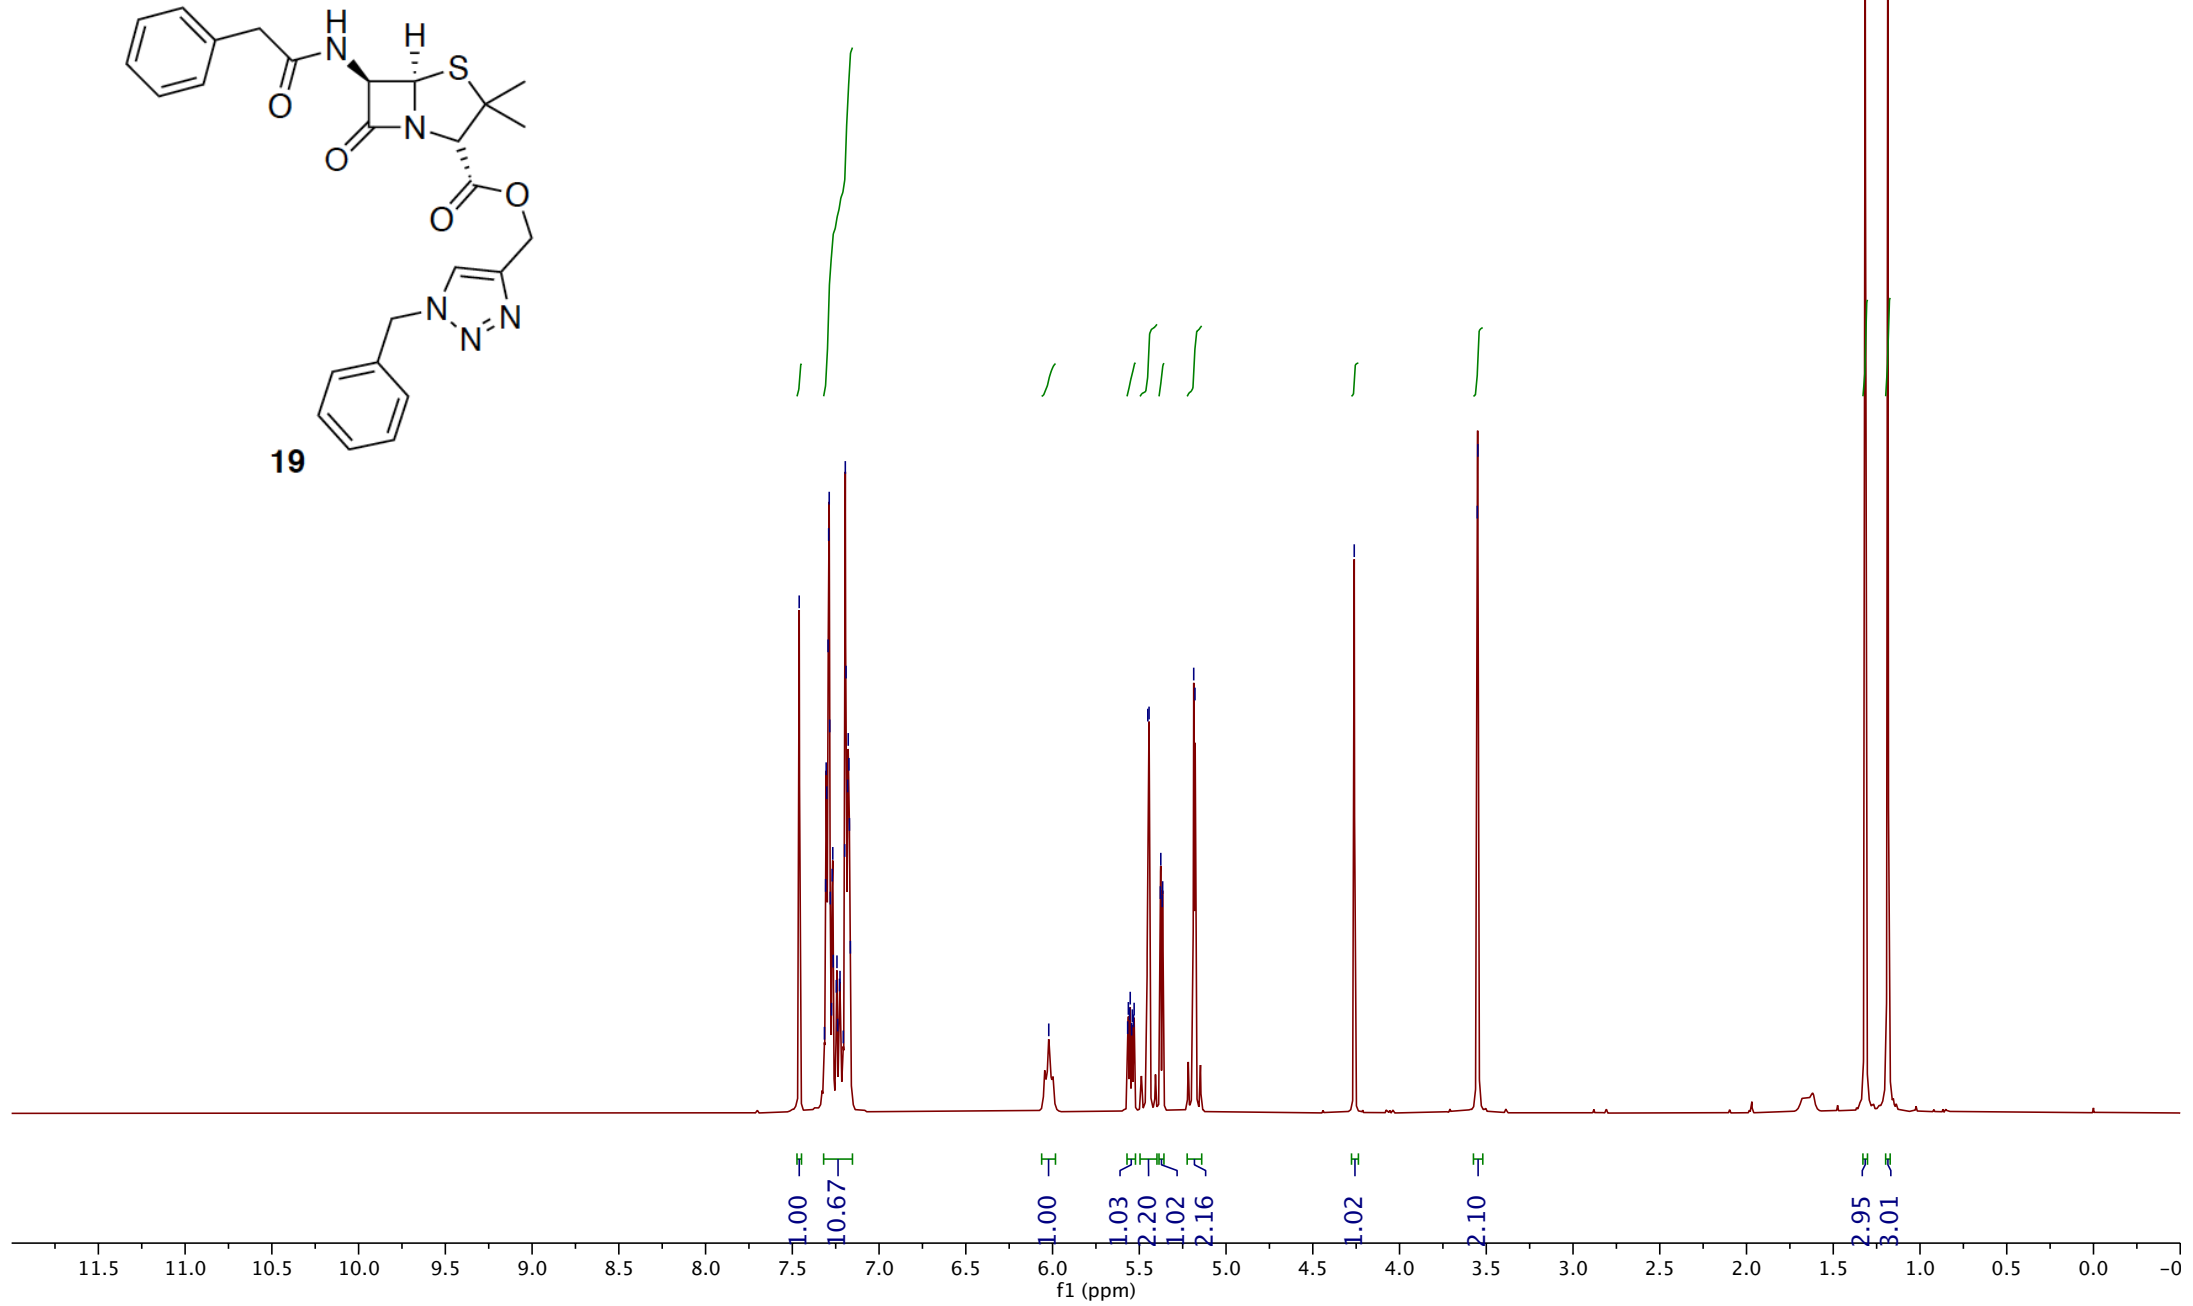

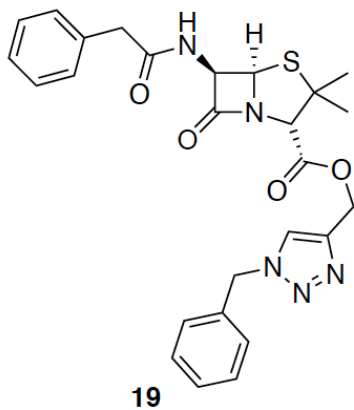

173.58  
170.41  
167.60

142.19  
134.38  
133.91  
129.64  
129.31  
129.24  
129.05  
128.19  
127.77  
124.20

77.16 CDCl<sub>3</sub>

70.21  
68.09  
64.70  
58.84  
58.53  
54.40  
43.49  
31.80  
26.77

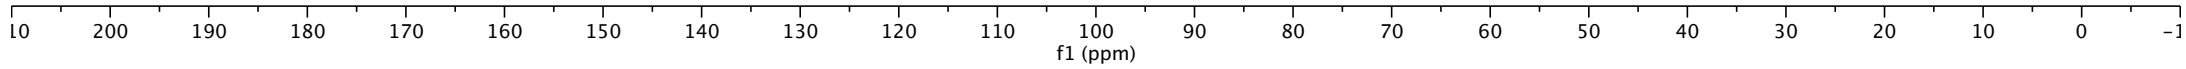

—7.26 CDCI3

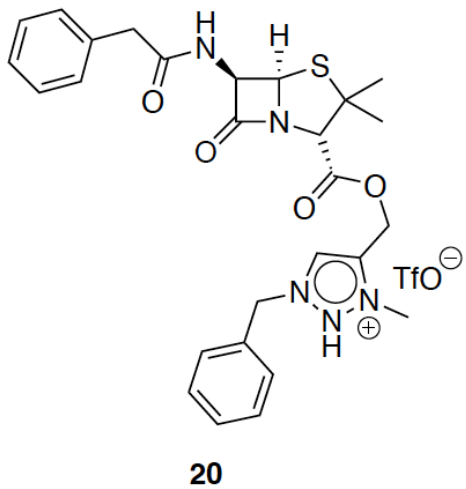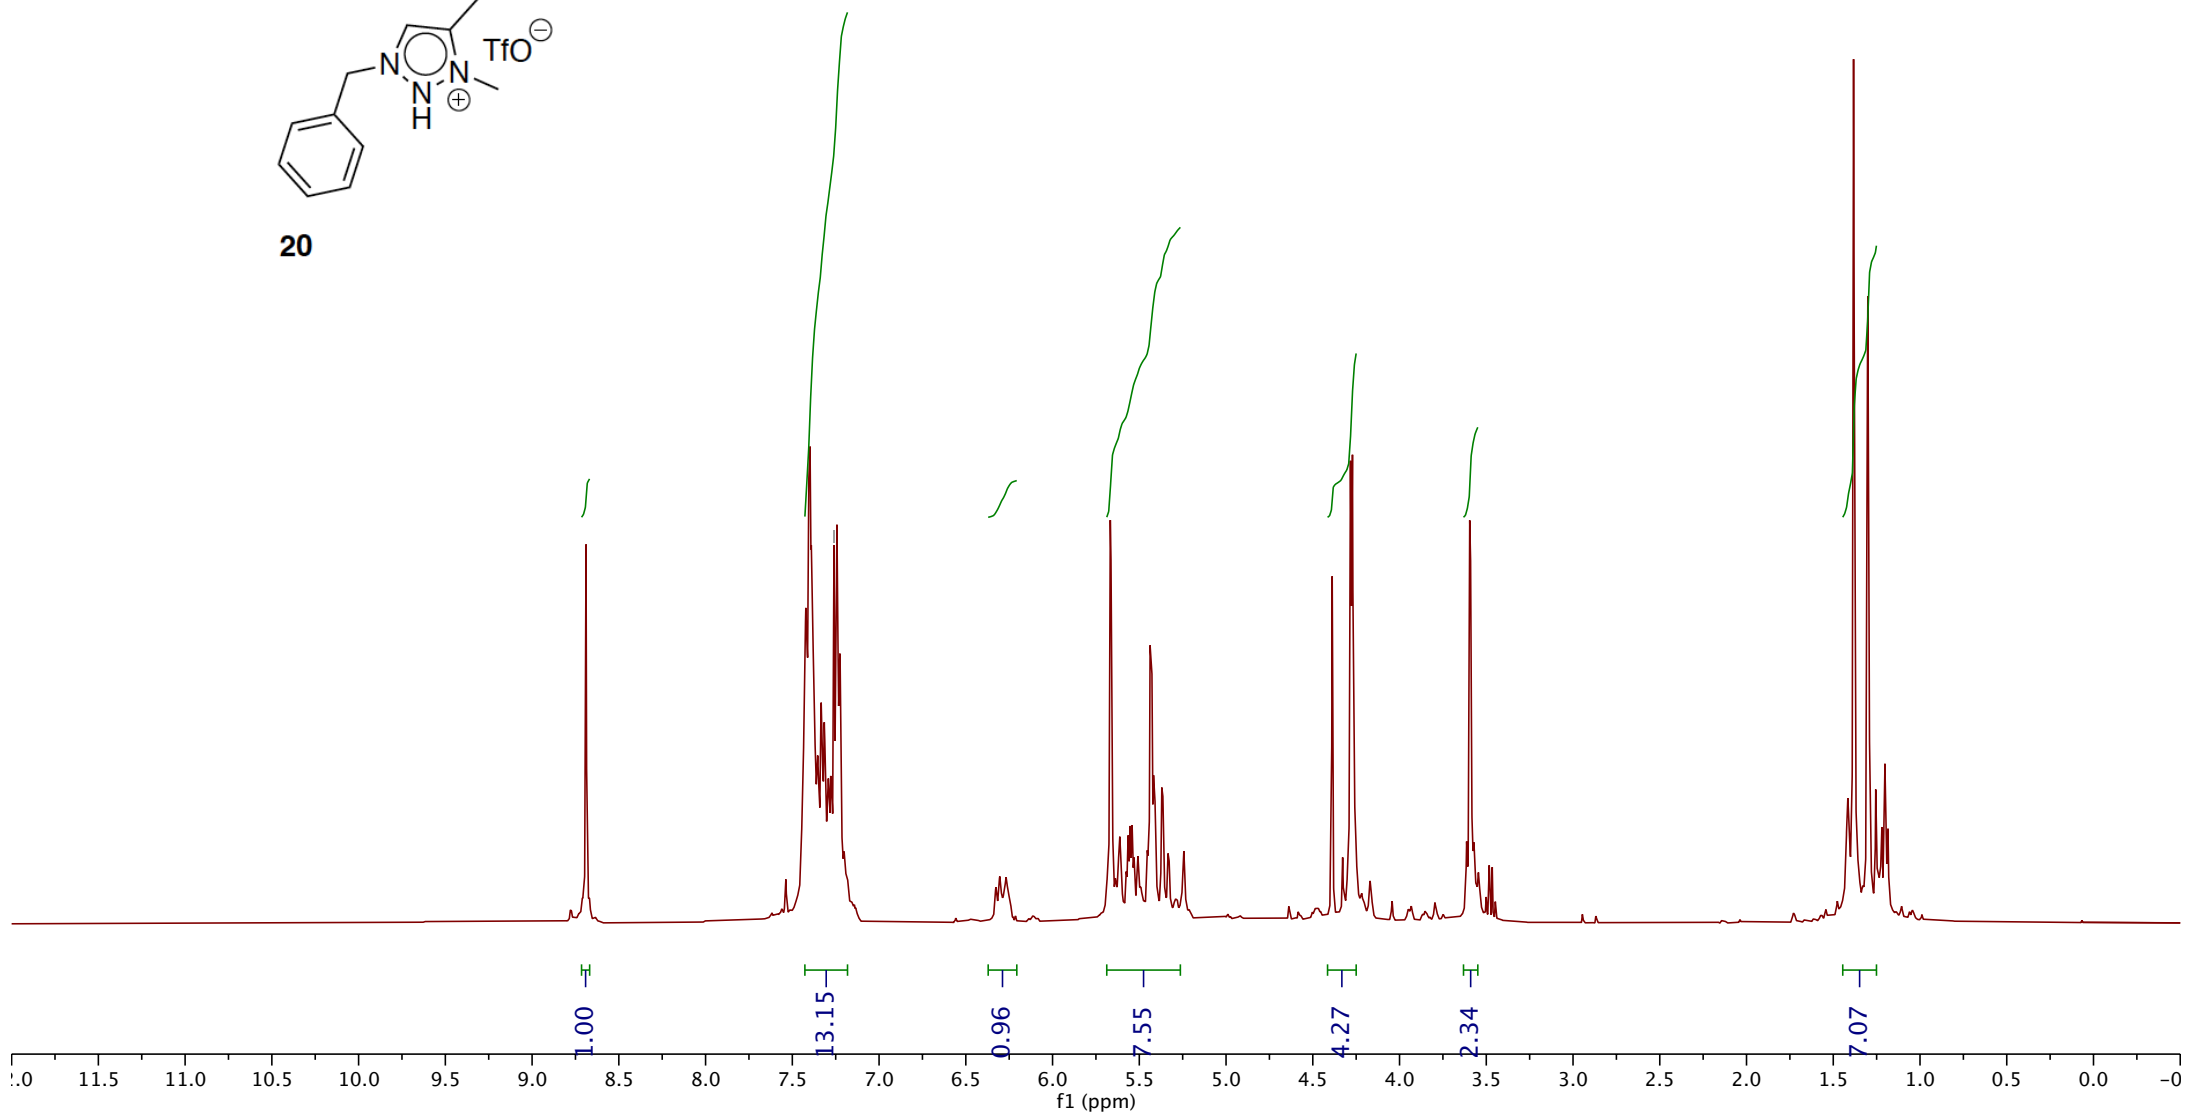

~173.35  
~170.46  
~167.01

138.63  
133.82  
130.82  
130.01  
129.46  
129.38  
129.34  
128.99  
127.53

~69.73  
~67.75  
~64.38  
~58.87  
~57.60  
~54.20

—43.11  
—38.55  
—31.68  
—26.35

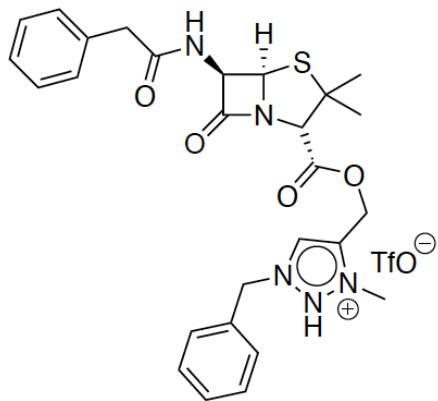

20

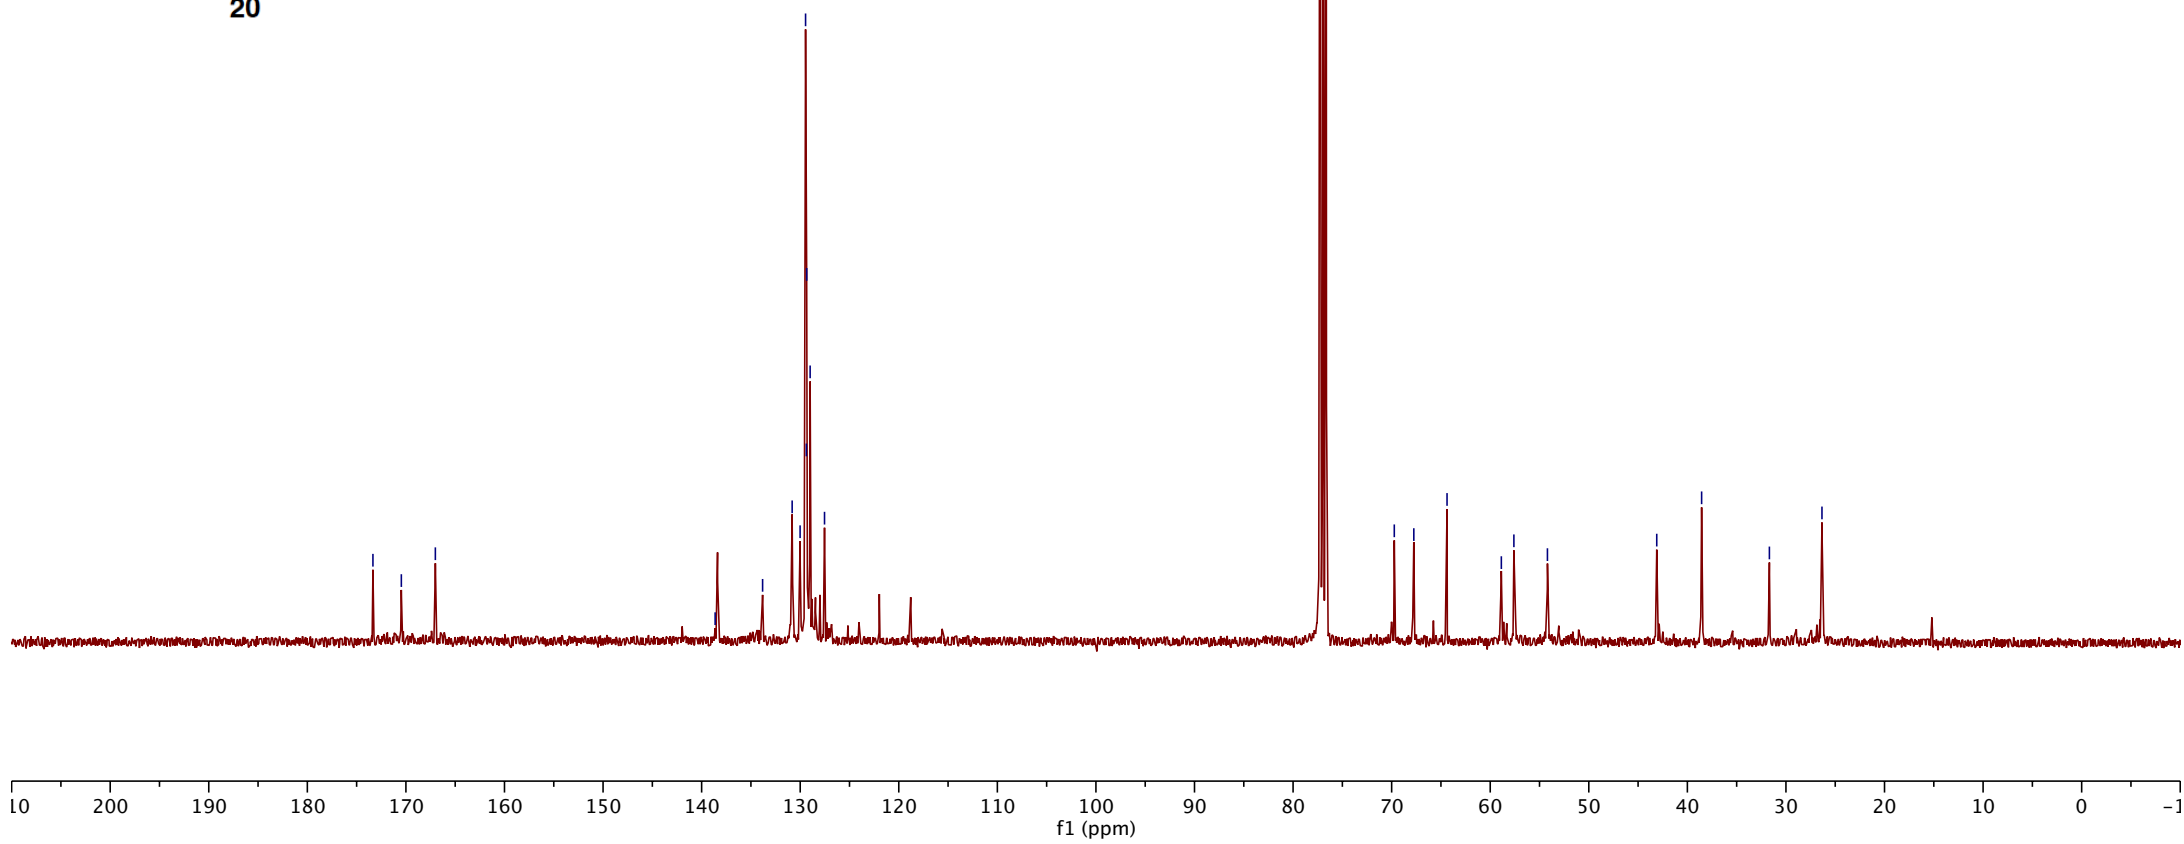

7.52  
7.51  
7.51  
7.50  
7.50  
7.37  
7.37  
7.36  
7.36  
7.35  
7.35  
7.35  
7.34  
7.33  
7.33  
7.32  
7.31  
7.31  
7.30  
7.29  
7.25  
7.25  
7.24  
7.24  
7.23  
7.23  
6.05  
6.03  
5.65  
5.64  
5.62  
5.61  
5.60  
5.43  
5.42  
5.26  
5.22  
5.21  
5.18  
4.33  
4.17  
—3.61

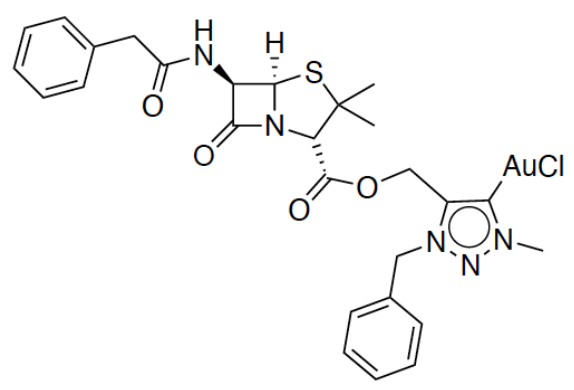

21

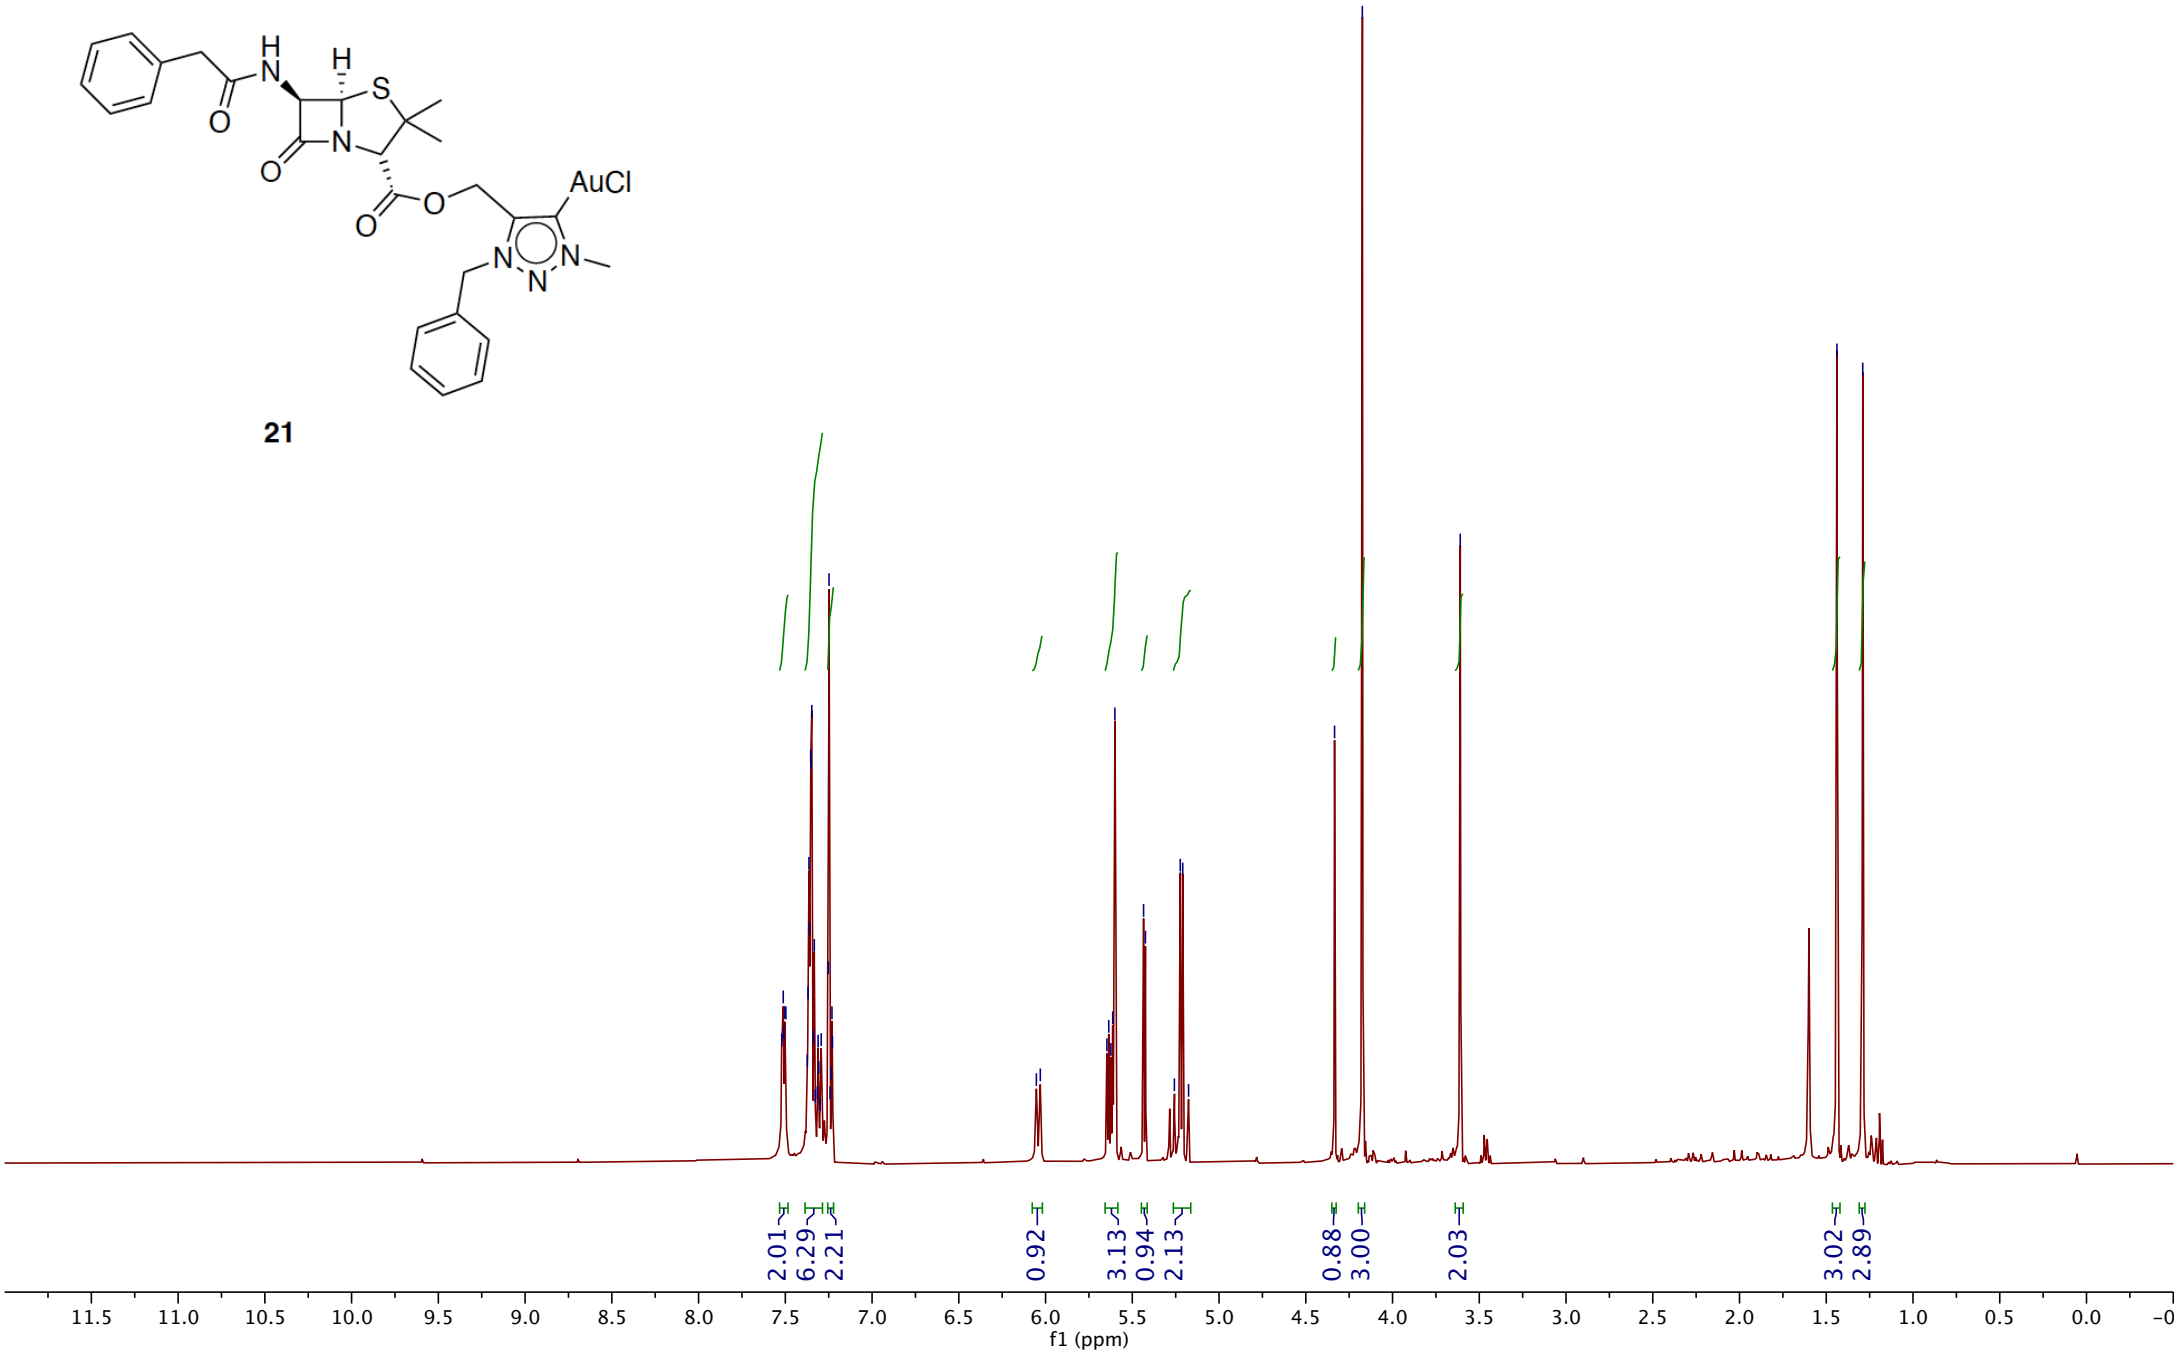

—1.44  
—1.29



MGM880B  
single pulse decoupled gated NOE

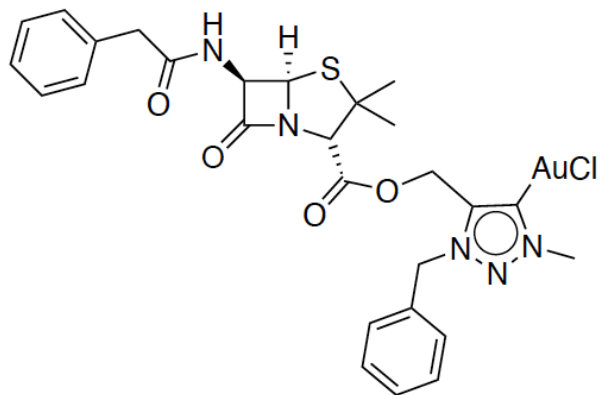

21

— 173.85  
— 170.45  
— 167.67  
— 161.45

— 140.98  
— 133.84  
— 133.26  
— 129.66  
— 129.53  
— 129.31  
— 129.26  
— 129.08  
— 127.86

77.16 CDCl<sub>3</sub>

— 70.15  
— 67.97  
— 64.76  
— 59.27  
— 58.79  
— 56.05

— 43.50

— 37.70

— 31.49

— 27.04

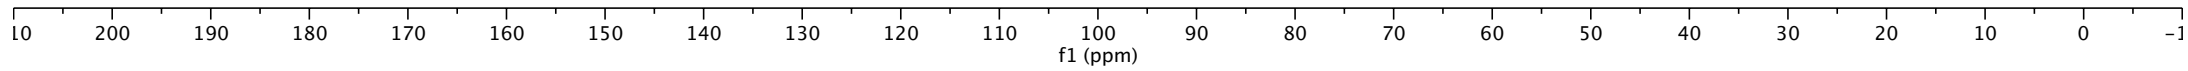

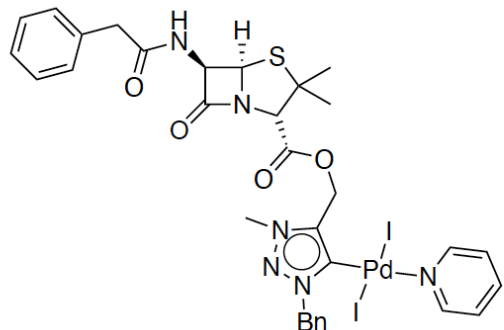

22

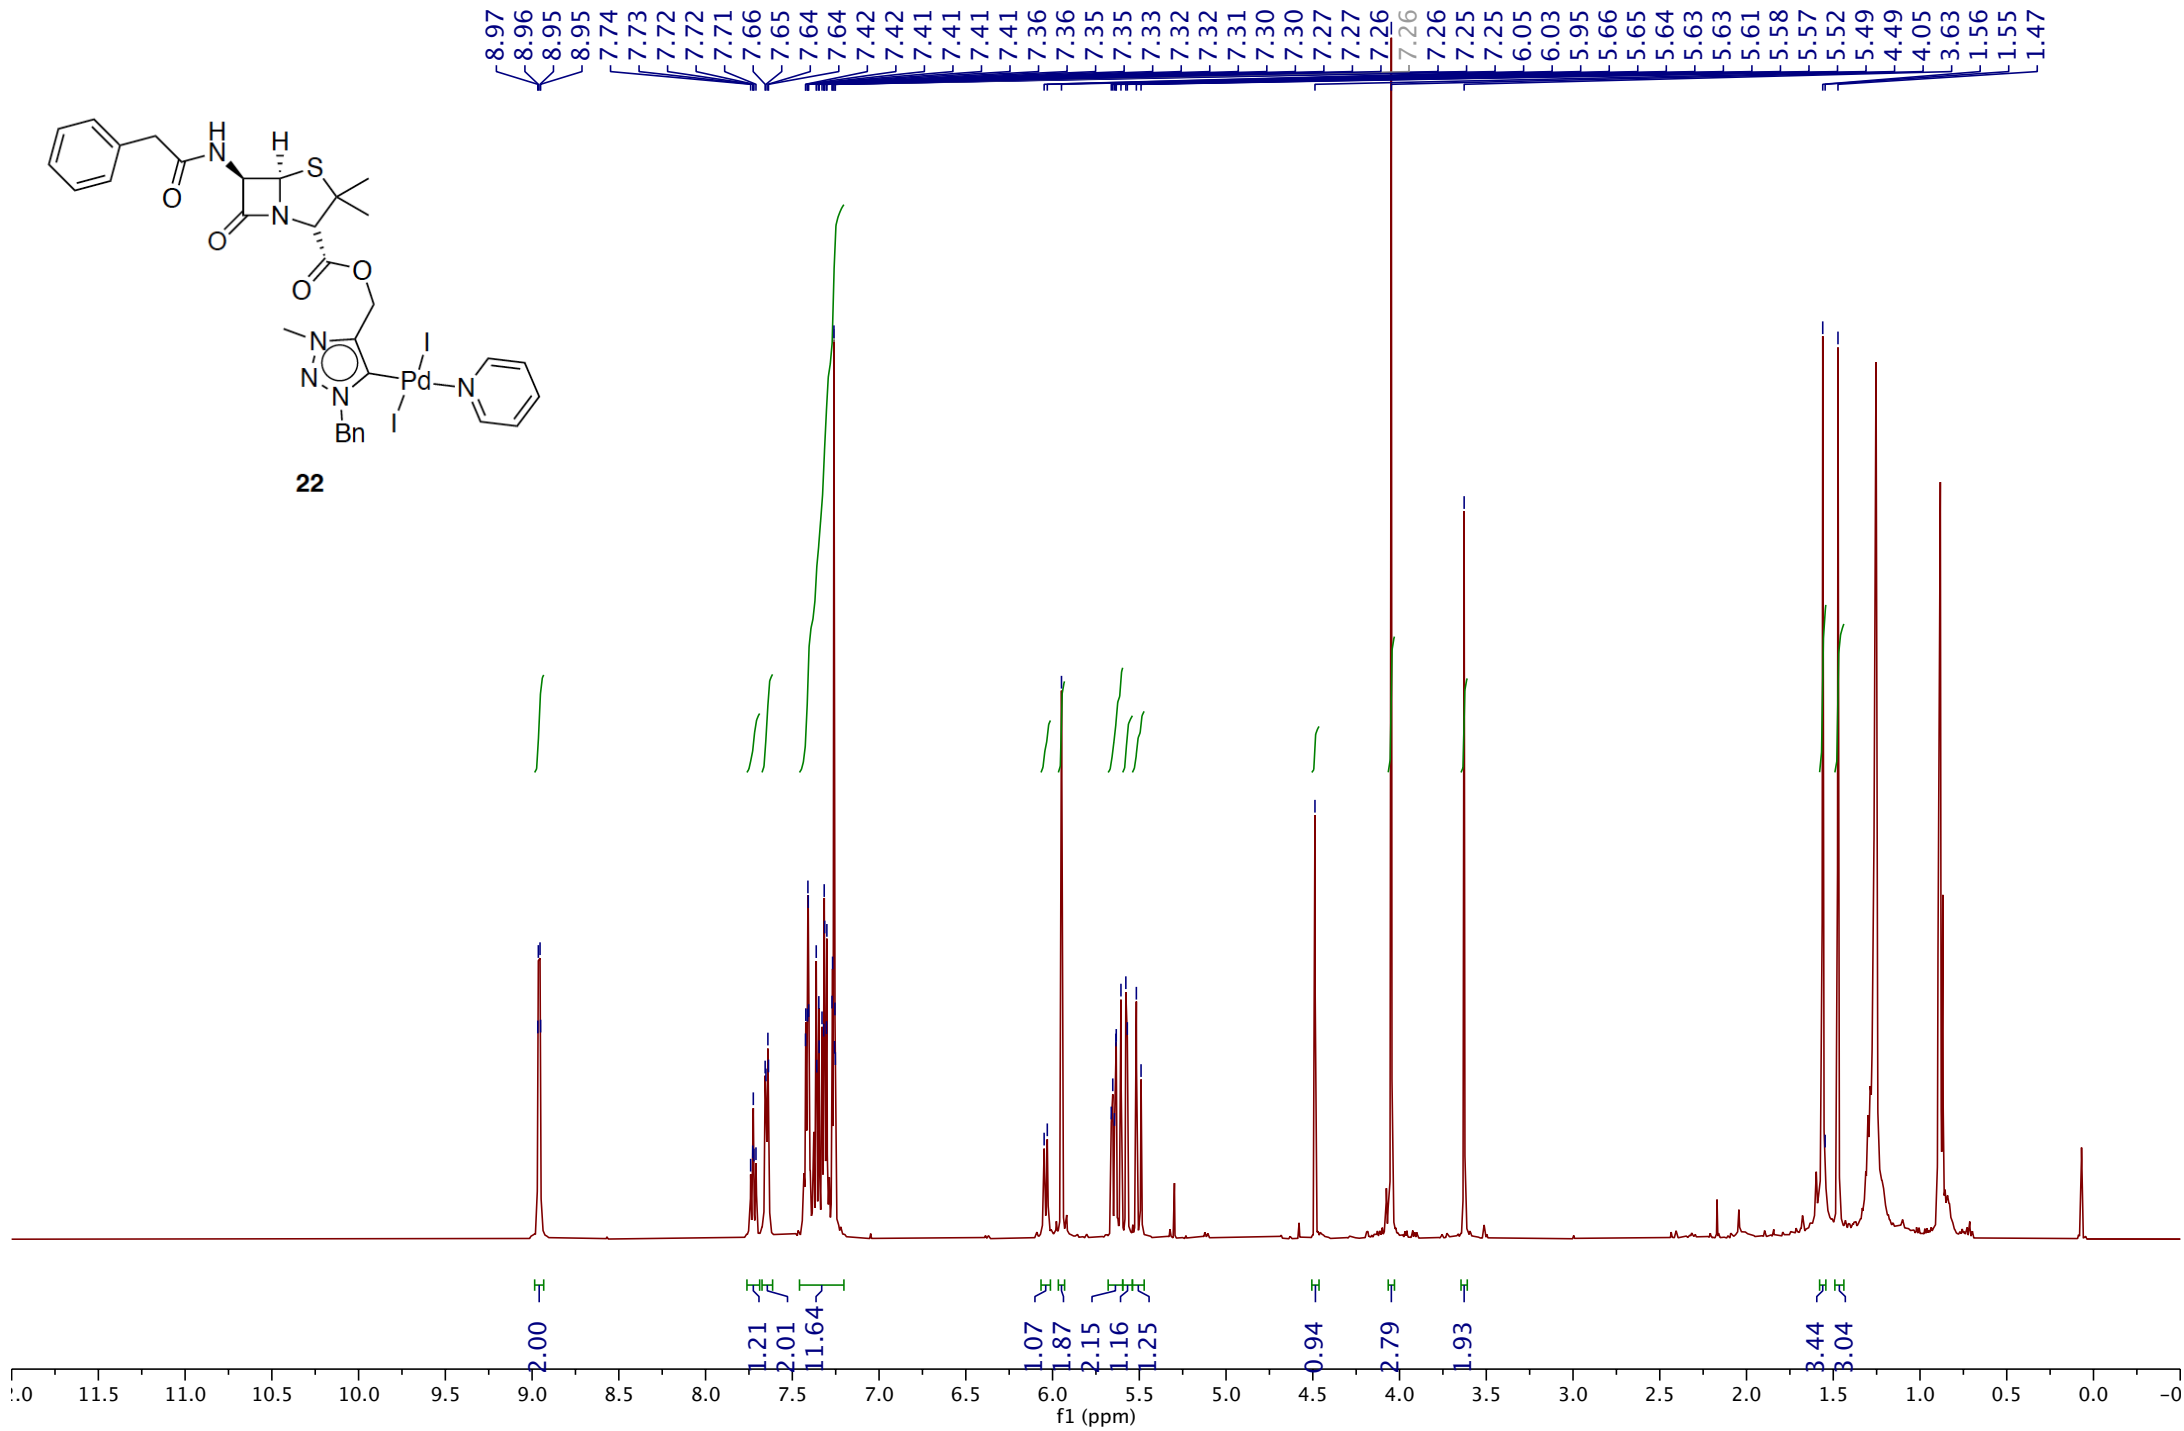

MGM947B-13c  
STANDARD PROTON PARAMETERS

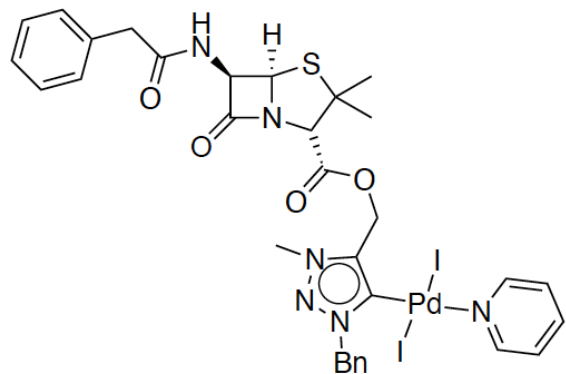

22

173.53  
170.37  
167.63

154.02

139.84  
137.89  
137.70  
133.92  
133.21  
130.32  
129.70  
129.29  
129.19  
128.96  
127.82  
124.59

77.41  
77.36  
77.16 CDCl<sub>3</sub>  
77.16  
76.91  
70.39  
68.23  
64.94  
60.11  
58.90  
57.25

43.57

37.53  
32.06  
31.73  
29.85  
27.60  
22.80

14.27

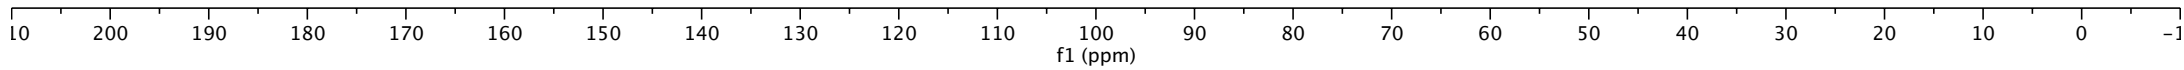

Supplement: d2ob00216g1.pdf [file d2ob00216g1.pdf]
